# Supplementary material for: Regioselective and stereoselective cleavages of P–S/C–S bonds by lithium and the formation of P-stereogenic functional phosphine derivatives
Source: Royal Society of Chemistry journal article supplement (doi:10.1039/d0qo00891e), 2020-10-12

**The Regio and Stereoselective Cleavages of P-S/C-S bonds by Lithium and the Formation of P-Stereogenic Functional Phosphine Derivatives**

Xiao-Ning Wang,<sup>†</sup> Hong-Xing Zheng,<sup>†</sup> Yu Zhang, Bing-Xia Yan, Zhan-Cai Li, Qiang Li\* and Chang-Qiu Zhao\*

College of Chemistry and Chemical Engineering, Liaocheng University, Liaocheng, Shandong 252059, China

**List of Contents**

|                                                                                                                     |           |
|---------------------------------------------------------------------------------------------------------------------|-----------|
| <b>Part 1. Preparations of optically pure starting material <i>S<sub>P</sub>-3</i> and <i>R<sub>P</sub>-3'</i>.</b> | <b>3</b>  |
| <b>Part 2. The alkylation of <i>S<sub>P</sub>-3</i> with alkyl halides.</b>                                         | <b>8</b>  |
| <b>Part 3. Cleavage of P-S bond of <i>S<sub>P</sub>-4b</i> bond with Grignard reagents.</b>                         | <b>16</b> |
| <b>Part 4. Exploring the mechanism of cleavage of P-S/C-S bonds.</b>                                                | <b>17</b> |
| <b>Part 5. The <i>P</i>-alkylation of <i>S<sub>P</sub>-4b</i> with alkyl halides and formaldehyde.</b>              | <b>24</b> |
| <b>Part 6. Crystallographic information 3, 3', 4e and 5</b>                                                         | <b>34</b> |
| <b>Part 7. Selected photocopies of <sup>1</sup>H, <sup>31</sup>P and <sup>13</sup>C NMR spectrum.</b>               | <b>38</b> |

**General Chemistry:**

$^1\text{H}$  NMR spectrum were recorded on a 400-MHz spectrometer. Chemical shift for  $^1\text{H}$  NMR spectrum (in parts per million) relative to internal tetramethylsilane ( $\text{Me}_4\text{Si}$ ,  $\delta = 0.00$  ppm) with  $\text{CDCl}_3$ .  $^{13}\text{C}$  NMR spectrum were recorded at 101 MHz. Chemical shifts for  $^{13}\text{C}$  NMR spectrum are reported (in parts per million) relative to  $\text{CDCl}_3$  ( $\delta = 77.0$  ppm).  $^{31}\text{P}$  NMR spectrum were recorded at 162 MHz, and chemical shifts reported (in parts per million) relative to external 85% phosphoric acid ( $\delta = 0.0$  ppm). TLC plates were visualized by UV. All products were further characterized by HRMS (high resolution mass spectrum) or Elemental Analysis. Copies of their  $^1\text{H}$ ,  $^{31}\text{P}$  and  $^{13}\text{C}$  NMR spectrum were provided. Melting points were determined on a Reichert Thermovar melting point apparatus and are uncorrected. The diastereoselective ratio were assign as the ratio of *R*-stereoisomer/*S*-stereoisomer.

**Reagent and solvents:**

All the solvents used were dried and freshly distilled prior to use. Toluene, chloroform and dichloromethane distilled under calcium hydride. THF, ether and hexane were distilled under sodium and benzophenone. Unless otherwise stated, the commercially available reagents were used without further purification. Some of the Grignard reagent was prepared according standard procedure in ca. 0.8 M solution in ether or THF. All reactions were carried out under  $\text{N}_2$  atmosphere in dry glassware using Schlenk-line techniques. Air and moisture sensitive liquids and solutions were transferred via syringe.

### Part 1. Preparations of optically pure starting material *S<sub>P</sub>*-3 and *R<sub>P</sub>*-3'.

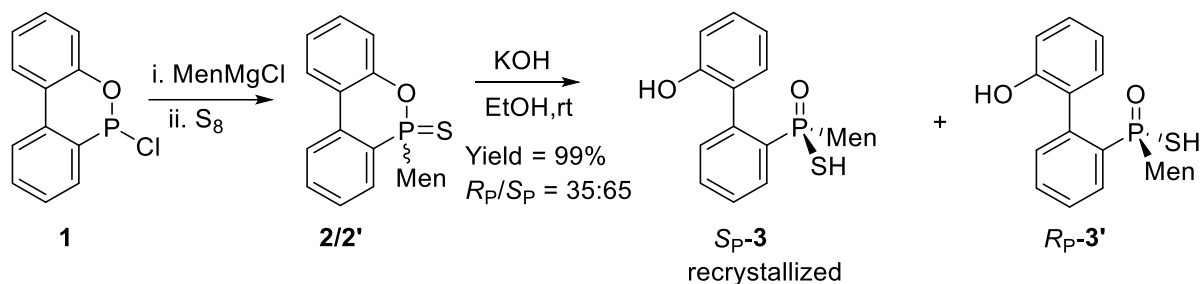

### The preparation of 6-(-)-menthyl-6*H*-dibenz[*c,e*][1,2]-oxaphosphinine 6-sulfide 2/2'.

To the solution of CDOP (5.00 g, 21.31 mmol) in THF (5 mL), the solution of (-)-menthyl magnesium chloride (prepared according standard procedure, 0.8 M solution in THF, 40 mL, 32 mmol) was added dropwise. The mixture was stirred at room temperature for 8 hours, and *S*<sub>8</sub> (0.75 g, 23.44 mmol) was added. After stirring for 5 hours at room temperature, the reaction was quenched with diluted hydrochloric acid (7%) and the solvent was removed. The mixture was extracted with dichloromethane (3×10 mL), washed with water (3×10 mL), dried over magnesium sulfate. After removing solvent, the residue was purified with column chromatography on silica gel (petroleum ether/ ethyl acetate = 3/1) to afford 2/2' (7.0 g, 90%, 50:50 drp).

### *R<sub>P</sub>*/*S<sub>P</sub>*-6-(-)-Menthyl-6*H*-dibenzo[*c,e*][1,2]-oxaphosphinine 6-sulfide (2/2')

The pure 2/2' was obtained as a white solid, m.p. 79.0 – 81.2 °C; <sup>31</sup>P NMR (202 MHz, CDCl<sub>3</sub>) δ = 96.85 (s), 93.51 (s); <sup>1</sup>H NMR (500 MHz, CDCl<sub>3</sub>) δ = 8.16 – 8.07 (m, 1H), 7.99 (ddd, *J*=13.7, 7.6, 0.9, 1H), 7.90 (ddd, *J*=7.4, 5.0, 1.3, 1H), 7.83 (dd, *J*=7.9, 4.7, 1H), 7.78 (dd, *J*=7.8, 4.7, 1H), 7.64 (q, *J*=7.5, 1H), 7.54 – 7.47 (m, 1H), 7.43 – 7.33 (m, 1H), 7.28 (d, *J*=7.9, 1H), 7.25 (s, 1H), 7.24 – 7.12 (m, 1H), 2.80 – 2.67 (m, 1H), 2.21 – 2.06 (m, 1H), 2.06 – 1.93 (m, 2H), 1.93 – 1.82 (m, 1H), 1.77 – 1.58 (m, 3H), 1.44 (ddd, *J*=25.1, 12.4, 8.0, 1H), 1.04 (t, *J*=6.7, 3H), 0.90 (dd, *J*=11.1, 6.1, 3H), 0.83 (d, *J*=11.9, 1H), 0.79 (d, *J*=6.8, 2H), 0.72 (d, *J*=5.9, 2H), 0.67 (d, *J*=6.9, 1H); <sup>13</sup>C {<sup>1</sup>H} NMR (126 MHz, CDCl<sub>3</sub>) δ = 149.8 (dd, *J*=21.7), 134.5 (dd, *J*=87.2), 133.5 (d, *J*=11.3), 133.0 – 131.9 (m), 130.6 (d, *J*=48.1), 129.1 (d, *J*=89.2), 128.4 (dd, *J*=29.3), 126.3 (d, *J*=92.0), 125.1 (d, *J*=19.3), 124.6 (d, *J*=13.0), 123.8 (t, *J*=8.8), 121.1 (d, *J*=5.6), 120.5 (d, *J*=5.6), 44.0 (s), 42.7 (d, *J*=2.7), 41.0 (dd, *J*=188.8), 35.4 (s), 34.3 (dd, *J*=42.1), 32.7 (dd, *J*=19.9), 28.5 (dd, *J*=25.8), 24.0 (dd, *J*=15.1), 22.5 (d, *J*=20.4), 21.5 (d, *J*=47.8), 16.9 (s), 14.1 (s). HRMS (ESI<sup>+</sup>) Calcd. for C<sub>22</sub>H<sub>27</sub>OPS [M+Na<sup>+</sup>]: 393.1418, Found: 393.1448.

**The preparation of *S<sub>P</sub>*-(2'-hydroxy-[1,1'-biphenyl]-2-yl)((-)-menthyl) phosphinothioic *S*-acid (*S<sub>P</sub>*-3).**

To the solution of **2/2'** (5.00 g, 13.50 mmol, 50:50 drp) in ethanol (10 mL) and water (1 mL), potassium hydroxide (1.78 g, 27.01 mmol) was added, and the solution was stirred at 50 °C for 5 hours. After the reaction is completed, the ethanol was removed and the solution was twice washed with petroleum ether (2×10 mL), diluted hydrochloric acid (7%) was added to adjust PH to 8-9. The mixture was extracted with dichloromethane (3×10 mL), washed with water (3×10 mL), dried over magnesium sulfate. After removing solvent **3/3'** (5.18 g, 99%, 65:35 drp) was afforded. The crude product was recrystallized from dichloromethane: petroleum ether = 2:1 at -40 °C to afford *S<sub>P</sub>*-3 (1.45 g, 28%, <1:99 drp).

***S<sub>P</sub>*-(2'-Hydroxy-[1,1'-biphenyl]-2-yl)((-)-menthyl) phosphinothioic *S*-acid (*S<sub>P</sub>*-3)**

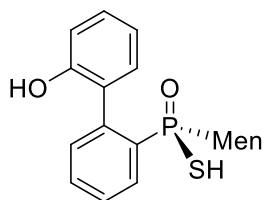

The optically pure *S<sub>P</sub>*-3 was obtained as a white solid, m.p. 166.9 – 169.8 °C; <sup>31</sup>P NMR (202 MHz, MeOD) δ = 82.74 (s); <sup>1</sup>H NMR (500 MHz, MeOD) δ = 8.60 – 8.50 (m, 1H), 7.31 (p, *J*=7.3, 2H), 7.23 – 7.14 (m, 1H), 7.00 – 6.95 (m, 1H), 6.94 – 6.89 (m, 2H), 6.86 (d, *J*=8.0, 1H), 2.61 – 2.49 (m, 1H), 1.58 (td, *J*=11.0, 5.5, 1H), 1.47 – 1.34 (m, 2H), 1.19 (s, 1H), 0.90 (ddd, *J*=20.6, 11.1, 3.1, 1H), 0.72 (d, *J*=6.9, 4H), 0.66 – 0.48 (m, 6H), 0.36 (d, *J*=6.7, 3H); <sup>13</sup>C {<sup>1</sup>H} NMR (126 MHz, MeOD) δ = 153.7 (s), 140.3 (d, *J*=7.5), 138.7 (d, *J*=88.3), 135.6 (d, *J*=1.6), 132.8 (d, *J*=11.7), 131.1 (d, *J*=9.4), 130.8 (s), 129.3 (d, *J*=1.6), 128.7 (s), 126.2 (d, *J*=11.6), 121.3 (s), 121.0 (s), 43.5 (d, *J*=2.7), 42.8 (d, *J*=73.7), 36.9 (s), 34.6 (s), 32.6 (d, *J*=16.1), 27.4 (d, *J*=2.6), 24.06 (d, *J*=13.9), 21.7 (s), 20.7 (s), 14.5 (s). HRMS (ESI<sup>+</sup>) Calcd. for C<sub>22</sub>H<sub>29</sub>O<sub>2</sub>PS [M+H<sup>+</sup>]: 388.1626, Found: 388.1590.

### The cyclization of *S<sub>P</sub>-3* to form *R<sub>P</sub>-5*.

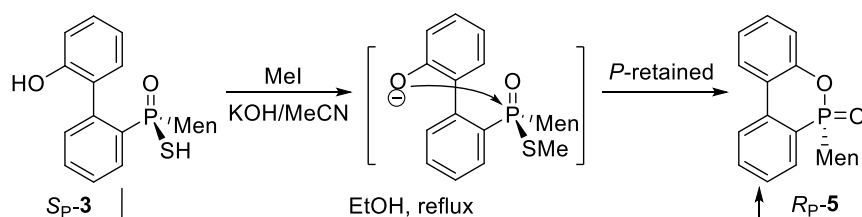

### Cyclization of *S<sub>P</sub>-3* with methyl iodide in the presence of base.

To the suspension of *S<sub>P</sub>-3* (80.0 mg, 0.205 mmol) and potassium hydroxide (14.9 mg, 0.225 mmol) in acetonitrile (1 mL), was added methyl iodide (51.2  $\mu$ L, 0.822 mmol) and the mixture was stirred at room temperature for 5 hours. After the reaction was completed, as monitored with TLC, saturated solution of ammonium chloride (10 mL) was added. The mixture was extracted with dichloromethane (3 $\times$ 10 mL), washed with water (3 $\times$ 10 mL), dried over magnesium sulfate. After removing the solvents, the residue was purified with preparative TLC (silica gel, petroleum ether/ethyl acetate = 1/1 as eluent) to afford *R<sub>P</sub>-5* (48.1 mg, 80%, >99:1 drp).

### Thermal cyclization of *S<sub>P</sub>-3*.

The solution of *S<sub>P</sub>-3* (200.0 mg, 0.513 mmol) in ethanol (10 mL) was heated with reflux at 80  $^{\circ}$ C for 8 hours. After the reaction was completed, the solvent was removed, the residue was purified with preparative TLC (silica gel, petroleum ether/ethyl acetate = 1/1 as eluent) to afford *R<sub>P</sub>-5* (175.8 mg, 99%, >99:1 drp).

### *R<sub>P</sub>-6*-((-)-Menthyl)dibenzo[c,e][1,2]-oxaphosphinine 6-oxide (*R<sub>P</sub>-5*)

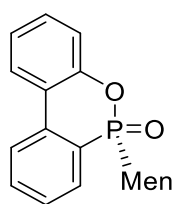

The pure *R<sub>P</sub>-5* was obtained as white solid, m.p. 126.8 – 129.0  $^{\circ}$ C;  $^{31}\text{P}$  NMR (202 MHz,  $\text{CDCl}_3$ )  $\delta$  = 43.21 (s);  $^1\text{H}$  NMR (500 MHz,  $\text{CDCl}_3$ )  $\delta$  = 7.88 (dd,  $J$ =15.6, 5.7, 3H), 7.67 (s, 1H), 7.50 (s, 1H), 7.36 (s, 1H), 7.24 (d,  $J$ =7.5, 1H), 7.17 (d,  $J$ =8.1, 1H), 2.72 – 2.50 (m, 1H), 1.95 – 1.77 (m, 2H), 1.79 – 1.69 (m, 1H), 1.65 (d,  $J$ =12.0, 1H), 1.43 (d,  $J$ =6.3, 1H), 1.08 (dd,  $J$ =14.6, 8.3, 2H), 1.01 (t,  $J$ =8.9, 3H), 0.97 – 0.83 (m, 2H), 0.75 (t,  $J$ =6.9, 6H);  $^{13}\text{C}$  { $^1\text{H}$ } NMR (126 MHz,  $\text{CDCl}_3$ )  $\delta$  = 149.4 (d,  $J$ =8.1), 135.7 (d,  $J$ =7.1), 133.0 (d,  $J$ =2.2), 131.8 (d,  $J$ =8.4), 130.5 (s), 128.1 (d,  $J$ =12.2), 124.9 (s), 124.8 (s), 124.3 (s), 123.8 (d,  $J$ =9.6), 122.6 (d,  $J$ =10.7), 120.7 (d,  $J$ =6.0), 42.6 (d,  $J$ =4.1), 38.9 (d,  $J$ =91.2), 35.3 (s), 34.2 (d,  $J$ =1.3), 32.8 (d,  $J$ =16.2), 29.0 (d,  $J$ =2.3), 24.3 (d,  $J$ =14.5), 22.4 (s), 21.8 (s), 16.4 (s). HRMS (ESI $^{+}$ ) Calcd. for  $\text{C}_{22}\text{H}_{27}\text{O}_2\text{P}$  [ $\text{M}+\text{Na}^{+}$ ]: 377.1646, Found: 377.1655.

### Preparation of optically pure $R_P-3'$ .

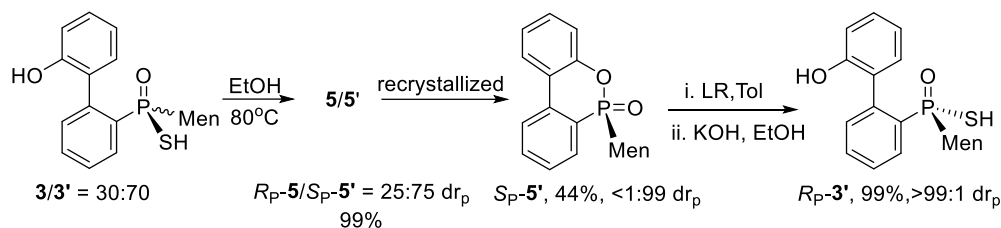

### The preparation of $S_P-6$ -((-)-menthyl)dibenzo[*c,e*][1,2]-oxaphosphinine 6-oxide $S_P-5'$ .

The solution of  $3/3'$  (300.0 mg, 0.771 mmol, 30:70 dr<sub>p</sub>) in ethanol (15 mL) was heated with reflux at 80 °C for 8 hours. After removing solvent,  $5/5'$  was afforded (267.4 mg, 99%, 25:75 dr<sub>p</sub>). The crude product was recrystallized from dichloromethane: petroleum ether = 1:1 at room temperature to afford  $S_P-5'$  (117.6 mg, 44%, <1:99 dr<sub>p</sub>).

### $S_P-6$ -((-)-Menthyl)dibenzo[*c,e*][1,2]-oxaphosphinine 6-oxide ( $S_P-5'$ ).

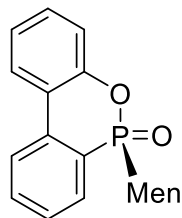

The pure  $S_P-5'$  was obtained as white solid, m.p. 126.2 – 128.3 °C;  $^{31}\text{P}$  NMR (202 MHz,  $\text{CDCl}_3$ )  $\delta = 40.34$  (s);  $^1\text{H}$  NMR (500 MHz,  $\text{CDCl}_3$ )  $\delta = 7.98 - 7.85$  (m, 3H), 7.67 (t,  $J=7.6$  Hz, 1H), 7.50 (tt,  $J= 8.9, 4.3$  Hz, 1H), 7.38 (t,  $J= 7.6$  Hz, 1H), 7.22 (dd,  $J=11.5, 8.1$  Hz, 2H), 2.43 – 2.33 (m, 1H), 2.11 (td,  $J= 13.8, 2.9$  Hz, 1H), 1.83 (d,  $J=3.1$  Hz, 1H), 1.77 – 1.67 (m, 3H), 1.63 (s, 3H), 1.24 (dd,  $J=10.9, 4.2$  Hz, 1H), 1.12 – 0.93 (m, 3H), 0.86 (d,  $J=6.8$  Hz, 3H), 0.62 (d,  $J=6.8$  Hz, 3H);  $^{13}\text{C}$  { $^1\text{H}$ } NMR (126 MHz,  $\text{CDCl}_3$ )  $\delta = 149.4$  (s), 135.6 (d,  $J=1.9$ ), 132.7 (s), 130.5 (s), 130.4 (s), 128.3 (d,  $J=13.0$ ), 126.1 – 125.8 (m), 124.9 (s), 124.3 (s), 123.7 (d,  $J=9.3$ ), 122.5 (s), 120.4 (d,  $J=6.0$ ), 43.4 (d,  $J=3.5$ ), 40.8 (d,  $J=94.2$ ), 35.7 (s), 34.4 (s), 33.1 (d,  $J=14.9$ ), 28.8 (s), 24.7 (d,  $J=14.9$ ), 22.4 (s), 21.5 (s), 15.2 (s). HRMS (ESI<sup>+</sup>) Calcd. for  $\text{C}_{22}\text{H}_{27}\text{O}_2\text{P}$  [M+Na<sup>+</sup>]: 377.1646, Found: 377.1653.

### The preparation of $R_P$ -(2'-Hydroxy-[1,1'-biphenyl]-2-yl)((-)-menthyl) phosphinothioic *S*-acid ( $R_P-3'$ ).

Under nitrogen atmosphere,  $S_P-5'$  (80 mg, 0.226 mmol) was dissolved in toluene (1 mL). Lawson's reagent (100.5 mg, 0.248 mmol) was added dropwise and the solution was heated at 100 °C with stirring for 3 hours. After removing toluene in vacuo, potassium hydroxide (29.8 mg, 0.452 mmol) and ethanol (5 mL) were added, and the solution was stirred at 50 °C for 5 hours. After the reaction was completed, the ethanol was removed. Diluted hydrochloric acid (7%) were added to adjust PH to 6-7. The mixture was extracted with dichloromethane (3×10 mL), washed with water (3×10 mL), dried over magnesium sulfate. After removing solvent, the residue was

purified with preparative TLC (silica gel, ethyl acetate as eluent) to afford **R<sub>P</sub>-3'** (78.4 mg, 99%, >99:1 dr<sub>P</sub>).

**R<sub>P</sub>-(2'-Hydroxy-[1,1'-biphenyl]-2-yl)((-)-menthyl) phosphinothioic S-acid (R<sub>P</sub>-3')**

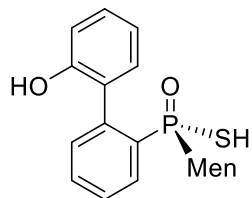

The optically pure **R<sub>P</sub>-3'** was obtained as a white solid; <sup>31</sup>P NMR (202 MHz, DMSO) δ = 78.81 (s); <sup>1</sup>H NMR (500 MHz, DMSO) δ = 12.27 (d, *J*=23.8 Hz, 1H), 8.65 – 8.52 (m, 1H), 7.42 – 7.28 (m, 2H), 7.25 – 7.13 (m, 1H), 6.94 (d, *J*=3.0 Hz, 1H), 6.87 (d, *J*=3.9 Hz, 2H), 6.78 (d, *J*=7.9 Hz, 1H), 5.75 (s, 1H), 2.73 – 2.59 (m, 1H), 1.56 (s, 1H), 1.41 (s, 2H), 1.06 (dd, *J*=22.5, 11.3 Hz, 1H), 0.82 (d, *J*=9.7 Hz, 1H), 0.72 (d, *J*=6.9 Hz, 4H), 0.61 – 0.52 (m, 5H), 0.36 (d, *J*=6.6 Hz, 3H); <sup>13</sup>C {<sup>1</sup>H} NMR (126 MHz, DMSO) δ = 156.2 (s), 141.1 (d, *J*=7.6), 140.7 – 140.0 (m), 136.0 (s), 133.2 (d, *J*=11.8), 131.3 (d, *J*=8.5), 130.9 (s), 129.2 (s), 128.9 (s), 126.3 (d, *J*=11.7), 121.7 (s), 119.9 (s), 43.36 (s), 42.9 (d, *J*=74.5), 37.3 (s), 34.9 (s), 32.6 (d, *J*=15.7), 27.1 (s), 24.4 (d, *J*=13.5), 23.3 (s), 22.3 (s), 15.7 (s).

## Part 2. The alkylation of *S*<sub>P</sub>-3 with alkyl halides.

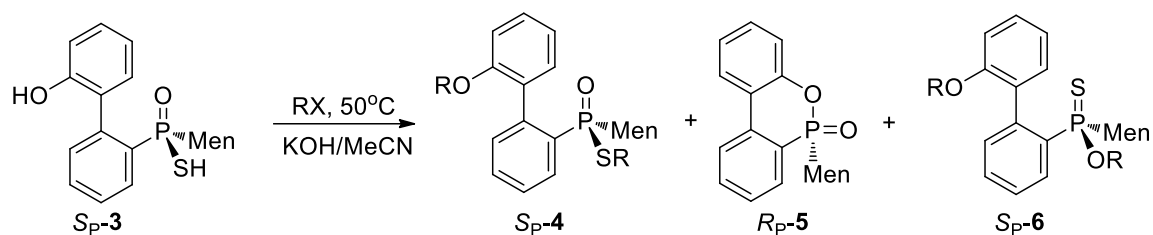

### The preparation of optically pure *S*<sub>P</sub>-4.

#### Typical procedure:

To the suspension of *S*<sub>P</sub>-3 (80.0 mg, 0.205 mmol) and potassium hydroxide (14.9 mg, 0.225 mmol) in acetonitrile (1 mL), was added bromoethane (61.3 μL, 0.822 mmol) and the mixture was stirred at 50 °C for 10 hours. After the reaction was completed, as monitored with TLC, saturated solution of ammonium chloride (10 mL) was added. The mixture was extracted with dichloromethane (3×10 mL), washed with water (3×10 mL), dried over magnesium sulfate. After removing the solvents, the residue was purified with preparative TLC (silica gel, petroleum ether/ethyl acetate = 3/1 as eluent) to afford *S*<sub>P</sub>-4b (76.3 mg, 83%, <1:99 dr<sub>P</sub> and 80:20 dr<sub>A</sub>).

#### *S*<sub>P</sub>-*S*-Ethyl-(2'-ethoxy-[1,1'-biphenyl]-2-yl) ((-)-menthyl) phosphinothioate (*S*<sub>P</sub>-4b)

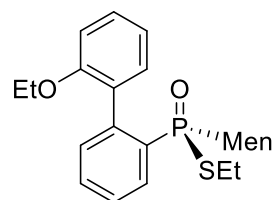

The crude *S*<sub>P</sub>-4b was obtained from bromoethane, and the pure compound was obtained as a colorless oil (76.3 mg, 83%, <1:99 dr<sub>P</sub> and 80:20 dr<sub>A</sub>) from preparative TLC (silica gel, petroleum ether/ethyl acetate = 3/1 as eluent); <sup>31</sup>P NMR (202 MHz, CDCl<sub>3</sub>) δ = 65.84 (s,

80%), 60.42 (s, 20%); <sup>1</sup>H NMR (500 MHz, CDCl<sub>3</sub>) δ = 8.21 (ddd, *J*=14.4, 7.6, 1.0, 0.8H), 8.15 – 8.03 (m, 0.2H), 7.62 (dd, *J*=7.5, 1.6, 0.8H), 7.50 – 7.37 (m, 2H), 7.31 (dt, *J*=12.8, 3.4, 2H), 7.14 (dd, *J*=7.3, 1.5, 0.2H), 7.01 (t, *J*=7.4, 1H), 6.91 (d, *J*=8.2, 1H), 4.07 – 3.86 (m, 2H), 3.03 – 2.90 (m, 1.6H), 2.88 – 2.73 (m, 0.4H), 2.65 – 2.53 (m, 0.8H), 2.52 – 2.41 (m, 0.2H), 1.94 (d, *J*=10.6, 0.2H), 1.58 (ddt, *J*=22.9, 20.3, 6.9, 4H), 1.39 (t, *J*=7.4, 2H), 1.28 (t, *J*=7.4, 1H), 1.25 – 1.12 (m, 4H), 1.09 – 0.87 (m, 1H), 0.76 (ddd, *J*=28.4, 16.2, 5.7, 8H), 0.51 (dd, *J*=11.8, 7.3, 0.8H), 0.33 (d, *J*=6.8, 3H); <sup>13</sup>C {<sup>1</sup>H} NMR (126 MHz, CDCl<sub>3</sub>) δ = 156.5 (d, *J*=108.1), 142.6 – 141.2 (m), 134.0 (d, *J*=18.8), 133.0 – 132.8 (m), 132.8 (d, *J*=10.3), 131.1 (s), 130.2 (d, *J*=2.6), 129.3 (d, *J*=5.0), 129.1 (d, *J*=3.3), 126.5 (d, *J*=12.0), 119.4 (d, *J*=85.0), 111.4 (d, *J*=126.7), 63.7 (d, *J*=43.6), 44.2 (dd, *J*=11.9, 3.7), 42.9 (d, *J*=66.8), 35.3 (s), 34.4 (d, *J*=1.1), 33.0 (d, *J*=16.6), 27.8 (d, *J*=2.0), 24.5 (d, *J*=14.7), 22.9 (d, *J*=2.0), 22.5 (s), 21.5 (d, *J*=8.2), 17.1 (d, *J*=3.7), 14.9 (d, *J*=3.2), 14.7 (d,



$J=12.7$ ). **HRMS (ESI<sup>+</sup>)** Calcd. for C<sub>26</sub>H<sub>37</sub>O<sub>2</sub>PS [M+Na<sup>+</sup>]: 467.2150, Found: 467.2169.

**S<sub>P</sub>-S-Butyl-(2'-butoxy-[1,1'-biphenyl]-2-yl) ((-)-menthyl) phosphinothioate (S<sub>P</sub>-4c)**

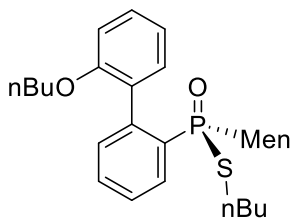

The crude **S<sub>P</sub>-4c** was obtained from 1-bromobutane, and the pure compound was obtained as a colorless oil (37.7 mg, 58%, <1:99 dr<sub>P</sub> and 80:20 dr<sub>A</sub>) from preparative TLC (silica gel, petroleum ether/ethyl acetate = 3/1 as eluent); <sup>31</sup>P NMR (202 MHz, CDCl<sub>3</sub>) δ = 66.10 (s, 80%), 60.54 (s, 20%); <sup>1</sup>H NMR (500 MHz, CDCl<sub>3</sub>) δ = 8.26 – 8.13 (m, 0.8H), 8.09 (dd,  $J=13.1$ , 7.6, 0.2H), 7.63 (dd,  $J=7.5$ , 1.5, 0.8H), 7.51 – 7.38 (m, 2H), 7.33 (d,  $J=1.6$ , 2H), 7.15 (dd,  $J=7.3$ , 1.4, 0.2H), 7.01 (d,  $J=7.4$ , 1H), 6.91 (d,  $J=8.2$ , 1H), 3.89 (ddd,  $J=14.3$ , 7.2, 5.3, 2H), 3.03 – 2.89 (m, 1.6H), 2.76 (ddt,  $J=19.3$ , 14.8, 5.9, 0.4H), 2.63 – 2.53 (m, 0.8H), 2.53 – 2.45 (m, 0.2H), 1.98 (d,  $J=10.6$ , 0.2H), 1.70 (dt,  $J=15.1$ , 7.4, 2H), 1.66 – 1.50 (m, 6H), 1.50 – 1.41 (m, 2H), 1.40 – 1.19 (m, 3H), 1.16 (s, 1H), 0.92 (t,  $J=7.4$ , 3H), 0.88 – 0.83 (m, 3H), 0.83 – 0.77 (m, 4H), 0.77 – 0.72 (m, 2H), 0.69 (t,  $J=6.2$ , 3H), 0.53 (d,  $J=7.3, 0.8H$ ), 0.34 (t,  $J=6.3$ , 3H); <sup>13</sup>C {<sup>1</sup>H} NMR (126 MHz, CDCl<sub>3</sub>) δ = 156.6 (d,  $J=93.6$ ), 141.5 (d,  $J=9.6$ ), 134.0 (d,  $J=11.6$ ), 133.3 (s), 133.0 (d,  $J=11.0$ ), 132.7 (d,  $J=10.3$ ), 131.1 – 130.4 (m), 130.1 (d,  $J=2.5$ ), 129.5 – 128.9 (m), 126.5 (t,  $J=11.1$ ), 119.4 (d,  $J=94.4$ ), 111.4 (d,  $J=122.3$ ), 67.8 (d,  $J=26.3$ ), 44.3 (d,  $J=3.7$ ), 43.0 (d,  $J=66.6$ ), 35.4 (s), 34.4 (d,  $J=1.4$ ), 33.6 (d,  $J=3.5$ ), 33.0 (d,  $J=16.6$ ), 31.2 (s), 28.1 (d,  $J=2.3$ ), 27.8 (d,  $J=2.3$ ), 24.6 (d,  $J=14.7$ ), 22.5 (s), 21.9 (d,  $J=3.4$ ), 21.5 (d,  $J=9.3$ ), 19.1 (d,  $J=3.5$ ), 15.0 (d,  $J=6.4$ ), 13.8 (d,  $J=7.8$ ), 13.6 (d,  $J=6.7$ ). **HRMS (ESI<sup>+</sup>)** Calcd. for C<sub>30</sub>H<sub>45</sub>O<sub>2</sub>PS [M+Na<sup>+</sup>]: 523.2776, Found: 523.2792.

**S<sub>P</sub>-S-Isobutyl-(2'-isobutoxy-[1,1'-biphenyl]-2-yl) ((-)-menthyl) phosphinothioate (S<sub>P</sub>-4d)**

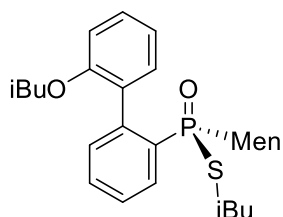

The crude **S<sub>P</sub>-4d** was obtained from bromoisobutane, and the pure compound was obtained as white solid (39.8 mg, 62%, <1:99 dr<sub>P</sub> and 80:20 dr<sub>A</sub>) from preparative TLC (silica gel, petroleum ether/ethyl acetate = 3/1 as eluent); m.p. 93.6 – 95.0 °C; <sup>31</sup>P NMR (202 MHz, CDCl<sub>3</sub>) δ = 66.38 (s, 80%), 61.29 (s, 20%); <sup>1</sup>H NMR (500 MHz, CDCl<sub>3</sub>) δ = 8.21 (dd,  $J=14.4$ , 7.6, 0.8H), 8.08 (dd,  $J=13.3$ , 7.8, 0.2H), 7.67 (dd,  $J=7.5$ , 1.4, 0.8H), 7.44 (dt,  $J=25.3$ , 7.5, 2H), 7.36 – 7.28 (m, 2H), 7.14 (d,  $J=7.3$ , 0.2H), 7.01 (t,  $J=7.5$ , 1H), 6.91 (t,  $J=8.3$ , 1H), 3.74 (dd,  $J=8.6$ , 5.3, 1H), 3.68 – 3.61 (m, 0.2H), 3.55 (t,  $J=8.5, 0.8H$ ), 2.86 (dtd,  $J=14.3$ , 12.3, 7.2, 1.6H), 2.70 (ddd,  $J=12.1$ , 9.1, 6.9, 0.4H), 2.64 – 2.50 (m, 1H), 1.95 (dd,  $J=13.4$ , 6.7, 1H), 1.87 – 1.71 (m, 2H), 1.67 – 1.43 (m, 4H), 1.16 (dd,  $J=12.7$ , 6.1, 1H), 1.04 (dd,  $J=6.6$ , 2.7, 5H), 0.95 (d,  $J=6.6$ , 1H), 0.85 (d,

$J=6.8$ , 3H), 0.80 (dd,  $J=13.3$ , 6.8, 6H), 0.77 – 0.70 (m, 3H), 0.67 (d,  $J=6.4$ , 2H), 0.53 (dd,  $J=11.9$ , 7.3, 1H), 0.35 (dd,  $J=15.8$ , 6.8, 3H);  $^{13}\text{C}$  { $^1\text{H}$ } NMR (126 MHz,  $\text{CDCl}_3$ )  $\delta$  = 156.6 (d,  $J=100.6$ ), 141.5 (dd,  $J=16.2$ ), 134.1 (d,  $J=7.3$ ), 133.2 (d,  $J=10.9$ ), 132.6 (d,  $J=10.5$ ), 130.5 (s), 130.0 (d,  $J=2.5$ ), 129.3 (d,  $J=6.1$ ), 129.1 (d,  $J=3.3$ ), 126.6 (d,  $J=12.0$ ), 119.8 (s), 111.4 (d,  $J=124.9$ ), 74.4 (d,  $J=45.0$ ), 44.3 (d,  $J=3.7$ ), 43.2 (s), 42.7 (s), 36.7 (d,  $J=2.2$ ), 35.4 (s), 34.5 (s), 32.9 (d,  $J=16.7$ ), 30.0 (d,  $J=3.5$ ), 28.3 (d,  $J=23.8$ ), 27.7 (d,  $J=2.1$ ), 24.6 (d,  $J=14.7$  Hz), 22.4 (s), 22.1 – 21.7 (m), 21.4 (s), 19.5 (s), 19.1 (d,  $J=11.2$ ), 14.9 (s). HRMS (ESI<sup>+</sup>) Calcd. for  $\text{C}_{30}\text{H}_{45}\text{O}_2\text{PS}$  [ $\text{M}+\text{Na}^+$ ]: 523.2776, Found: 523.2784.

**S<sub>P</sub>-S-Isopropyl-(2'-isopropoxy-[1,1'-biphenyl]-2-yl) ((-)-menthyl) phosphinothioate (S<sub>P</sub>-4e)**

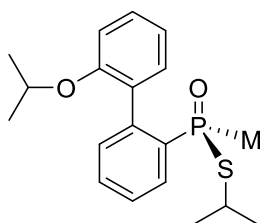

The crude **S<sub>P</sub>-4e** was obtained from bromoisopropane, and the pure compound was obtained as white solid (53.6 mg, 85%, <1:99 dr<sub>P</sub> and 81:19 dr<sub>A</sub>) from preparative TLC (silica gel, petroleum ether/ethyl acetate = 3/1 as eluent); m.p. 65.6 – 66.9 °C;  $^{31}\text{P}$  NMR (202 MHz,  $\text{CDCl}_3$ )  $\delta$  = 65.88 (s, 81%), 59.13 (s, 19%);  $^1\text{H}$  NMR (500 MHz,  $\text{CDCl}_3$ )  $\delta$  = 8.23 (dd,  $J=14.4$ , 7.6, 0.8H), 8.12 (dd,  $J=13.1$ , 7.6, 0.2H), 7.63 (dd,  $J=7.5$ , 1.5, 0.81H), 7.50 – 7.36 (m, 2H), 7.33 – 7.27 (m, 1H), 7.25 (s, 1H), 7.17 (d,  $J=7.3$ , 0.19H), 6.96 (ddd,  $J=19.6$ , 13.2, 6.4, 2H), 4.49 (dd,  $J=12.0$ , 6.0, 0.19H), 3.64 (dd,  $J=6.9$ , 1.8, 0.81H), 3.53 – 3.39 (m, 0.19H), 2.65 (dd,  $J=13.4$ , 6.7, 1H), 2.04 (d,  $J=11.0$ , 0.19H), 1.64 (dddd,  $J=23.5$ , 20.0, 15.2, 6.4, 4H), 1.45 (dd,  $J=11.0$ , 6.9, 5H), 1.38 (d,  $J=6.9$ , 1H), 1.30 – 1.19 (m, 3H), 1.14 (dd,  $J=13.6$ , 3.8, 5H), 0.81 (dd,  $J=11.6$ , 7.0, 4H), 0.78 – 0.70 (m, 2H), 0.68 (d,  $J=6.4$ , 2H), 0.47 (dd,  $J=11.6$ , 7.7, 0.81H), 0.40 (d,  $J=6.8$ , 1H), 0.34 (d,  $J=6.7$ , 2H);  $^{13}\text{C}$  { $^1\text{H}$ } NMR (126 MHz,  $\text{CDCl}_3$ )  $\delta$  = 155.6 (d,  $J=96.5$ ), 142.2 (d,  $J=9.3$ ), 134.3 (d,  $J=17.2$ ), 133.5 (s), 133.1 (s), 133.0 (d,  $J=3.4$ ), 130.5 (d,  $J=2.7$ ), 129.9 (d,  $J=2.4$ ), 129.1 (s), 126.6 – 124.9 (m), 119.5 (d,  $J=88.1$ ), 113.7 (d,  $J=64.3$ ), 70.9 (d,  $J=51.1$ ), 44.1 (d,  $J=3.6$ ), 43.2 (s), 42.7 (s), 35.6 (d,  $J=2.0$ ), 35.3 (s), 34.4 (d,  $J=1.0$ ), 32.6 (d,  $J=16.5$ ), 27.7 (d,  $J=1.6$ ), 26.3 (d,  $J=9.7$ ), 24.5 (d,  $J=14.7$ ), 22.7 (s), 22.5 (d,  $J=7.5$ ), 21.9 (d,  $J=23.0$ ), 21.4 (d,  $J=10.7$ ), 15.1 (d,  $J=45.1$ ).

HRMS (ESI<sup>+</sup>) Calcd. for  $\text{C}_{28}\text{H}_{41}\text{O}_2\text{PS}$  [ $\text{M}+\text{Na}^+$ ]: 495.2463, Found: 495.2466.

**S<sub>P</sub>-S-Allyl-(2'-(allyloxy)-[1,1'-biphenyl]-2-yl) ((-)-menthyl) phosphinothioate (S<sub>P</sub>-4f)**

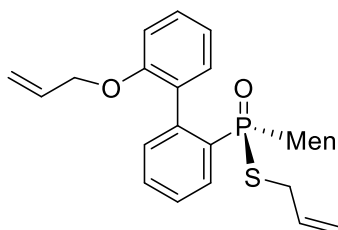

The crude **S<sub>P</sub>-4f** was obtained from allyl chloride, and the pure compound was obtained as a colorless oil (37.7 mg, 62%, <1:99

dr<sub>P</sub> and 82:18 dr<sub>A</sub>) from preparative TLC (silica gel, petroleum ether/ethyl acetate = 3/1 as eluent); <sup>31</sup>P NMR (202 MHz, CDCl<sub>3</sub>) δ = 65.83 (s, 82%), 60.97 (s, 18%); <sup>1</sup>H NMR (500 MHz, CDCl<sub>3</sub>) δ = 8.22 (dd, *J*=14.4, 7.7, 0.82H), 8.08 (dd, *J*=13.6, 7.8, 0.18H), 7.63 (d, *J*=7.4, 0.82H), 7.49 (s, 1H), 7.43 (s, 1H), 7.34 (t, *J*=7.8, 2H), 7.14 (d, *J*=7.3, 0.18H), 7.05 (d, *J*=7.5, 1H), 6.91 (d, *J*=8.2, 1H), 6.01 – 5.89 (m, 1H), 5.85 (dd, *J*=17.0, 10.8, 1H), 5.27 (d, *J*=16.9, 0.81H), 5.14 (s, 0.19H), 5.12 – 5.05 (m, 2.4H), 5.03 (d, *J*=6.0, 0.6H), 4.56 – 4.38 (m, 2H), 3.64 – 3.54 (m, 2.4H), 3.48 – 3.38 (m, 0.6H), 2.63 – 2.51 (m, 0.82H), 2.49 – 2.39 (m, 0.18H), 2.00 – 1.81 (m, 0.18H), 1.69 – 1.46 (m, 4H), 1.16 (t, *J*=9.8, 1H), 0.87 (dd, *J*=14.9, 7.7, 1H), 0.83 – 0.70 (m, 6H), 0.64 (d, *J*=6.4, 2H), 0.52 (dd, *J*=11.7, 7.4, 0.82H), 0.33 (t, *J*=5.5, 3H); <sup>13</sup>C {<sup>1</sup>H} NMR (126 MHz, CDCl<sub>3</sub>) δ = 156.0 (d, *J*=142.9), 141.4 (d, *J*=9.7), 134.9 (d, *J*=3.7), 134.1 (s), 132.9 (d, *J*=7.4), 132.7 (s), 130.4 (d, *J*=2.5), 129.2 (d, *J*=26.8), 126.7 (d, *J*=12.0), 120.1 (s), 117.6 (d, *J*=10.2), 116.1 (d, *J*=5.6), 110.9 (s), 68.5 (d, *J*=119.7), 44.3 (t, *J*=5.4), 43.3 (s), 42.8 (s), 35.4 (s), 34.3 (d, *J*=1.4), 33.4 (d, *J*=15.7), 33.1 (s), 32.9 (s), 30.9 (d, *J*=2.1), 27.8 (d, *J*=2.3), 24.6 (s), 24.5 (s), 22.4 (s), 21.4 (d, *J*=4.4), 14.9 (d, *J*=3.5). HRMS (ESI<sup>+</sup>) Calcd. for C<sub>28</sub>H<sub>37</sub>O<sub>2</sub>PS [M+Na<sup>+</sup>]: 491.2150, Found: 491.2166.

**S<sub>P</sub>-S-Phenethyl-((-)-menthyl) (2'-phenethoxy-[1,1'-biphenyl]-2-yl) phosphinothioate (S<sub>P</sub>-4g)**

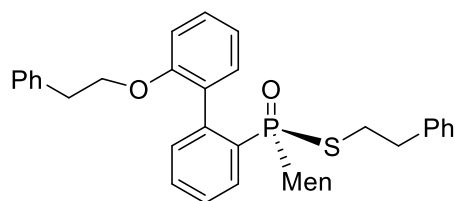

The crude **S<sub>P</sub>-4g** was obtained from (2-Bromoethyl) benzene, and the pure compound was obtained as a colorless oil (41.8mg, 54%, <1:99 dr<sub>P</sub> and 80:20 dr<sub>A</sub>) from preparative TLC (silica gel, petroleum ether/ethyl

acetate = 3/1 as eluent); <sup>31</sup>P NMR (202 MHz, CDCl<sub>3</sub>) δ = 66.57 (s, 80%), 61.34 (s, 20%); <sup>1</sup>H NMR (500 MHz, CDCl<sub>3</sub>) δ = 8.18 – 8.11 (m, 0.8H), 8.08 (dd, *J*=13.5, 7.5, 0.2H), 7.65 – 7.60 (m, 0.8H), 7.41 (dd, *J*=6.1, 2.6, 2H), 7.37 – 7.27 (m, 3H), 7.23 (d, *J*=7.5, 4H), 7.14 (d, *J*=7.2, 2H), 7.08 (d, *J*=7.4, 0.2H), 7.02 (t, *J*=7.2, 2H), 6.96 – 6.86 (m, 2H), 4.09 (dd, *J*=9.6, 4.9, 2H), 3.29 – 3.14 (m, 2H), 3.06 (d, *J*=6.9, 1H), 2.98 (dd, *J*=29.3, 21.5, 1H), 2.89 – 2.77 (m, 2H), 2.62 (dd, *J*=13.3, 6.7, 0.8H), 2.57 – 2.50 (m, 0.2H), 1.97 (dd, *J*=20.5, 10.0, 0.2H), 1.70 – 1.51 (m, 5H), 1.21 (d, *J*=10.2, 1H), 0.81 (d, *J*=7.0, 3H), 0.74 (d, *J*=6.7, 2H), 0.70 (d, *J*=6.5, 3H), 0.54 (dd, *J*=11.9, 7.2, 0.8H), 0.38 (d, *J*=6.8, 1H), 0.35 (d, *J*=6.7, 2H); <sup>13</sup>C {<sup>1</sup>H} NMR (126 MHz, CDCl<sub>3</sub>) δ = 155.8 (s), 141.3 (d, *J*=9.3), 140.1 (d, *J*=3.4), 138.4 (d, *J*=68.9), 134.1 (d, *J*=5.4), 133.1 (s), 133.1 (d, *J*=3.0), 132.8 (s), 132.7 (s), 130.9 – 130.7 (m), 130.3 (d, *J*=2.5), 129.3 (s), 129.2 (s), 129.1 (s), 128.8 (s), 128.7 (s), 128.4 (s), 128.4 (s), 128.1 (s), 126.6 (s), 126.5 (s), 126.4 (d, *J*=6.2), 126.1 (s), 119.6 (d,

$J=97.4$ ), 111.1 (d,  $J=128.3$ ), 68.7 (d,  $J=5.4$ ), 44.3 (t,  $J=4.5$ ), 43.3 (s), 42.8 (s), 37.8 (d,  $J=3.3$ ), 35.7 (s), 35.4 (s), 34.6 – 34.2 (m), 33.1 (d,  $J=16.5$ ), 29.5 (t,  $J=17.0$ ), 27.8 (t,  $J=17.9$ ), 24.6 (d,  $J=14.6$ ), 22.5 (d,  $J=12.2$ ), 21.5 (s), 15.0 (d,  $J=12.3$ ). **HRMS (ESI<sup>+</sup>)** Calcd. for C<sub>38</sub>H<sub>45</sub>O<sub>2</sub>PS [M+Na<sup>+</sup>]: 619.2776, Found: 619.2789.

**S<sub>P</sub>-S-(4-Methylbenzyl)-((-)-menthyl)(2'-((4-methylbenzyl)oxy)-[1,1'-biphenyl]-2-yl)**

**phosphinothioate (S<sub>P</sub>-4j)**

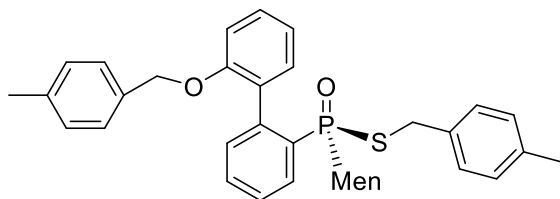

The crude **S<sub>P</sub>-4j** was obtained from 4-methyl benzyl chloride, and the pure compound was obtained as a colorless oil (49.6 mg, 64%, <1:99 dr<sub>P</sub> and 81:19 dr<sub>A</sub>) from preparative

TLC (silica gel, petroleum ether/ethyl acetate = 3/1 as eluent); **<sup>31</sup>P NMR (202 MHz, CDCl<sub>3</sub>)** δ = 65.66 (s, 81%), 61.25 (s, 19%); **<sup>1</sup>H NMR (500 MHz, CDCl<sub>3</sub>)** δ = 8.08 (dd,  $J=14.5, 7.7, 0.81$ H), 7.95 (dd,  $J=13.7, 7.7, 0.19$ H), 7.68 (d,  $J=7.5, 0.81$ H), 7.50 (t,  $J=7.5, 1$ H), 7.37 (dd,  $J=15.9, 7.8, 3$ H), 7.33 – 7.28 (m, 1H), 7.13 – 7.06 (m, 3H), 7.04 (d,  $J=8.0, 2$ H), 7.00 (dd,  $J=12.1, 8.1, 3$ H), 6.97 – 6.94 (m, 0.19H), 6.92 (d,  $J=7.7, 1$ H), 5.08 (d,  $J=12.0, 0.19$ H), 5.01 (d,  $J=11.9, 1$ H), 4.95 (d,  $J=11.9, 0.81$ H), 4.11 (dd,  $J=10.5, 8.4, 1.6$ H), 3.90 (ddd,  $J=19.9, 12.5, 8.1, 0.4$ H), 2.71 – 2.60 (m, 0.81H), 2.56 – 2.48 (m, 0.19H), 2.27 (dd,  $J=21.8, 9.8, 6$ H), 2.01 (d,  $J=10.8, 0.19$ H), 1.69 – 1.52 (m, 3H), 1.46 (d,  $J=10.3, 1$ H), 1.10 (t,  $J=9.7, 1$ H), 1.10 (t,  $J=9.7, 1$ H), 0.92 – 0.85 (m, 1H), 0.79 (t,  $J=9.0, 3$ H), 0.73 (d,  $J=6.6, 1$ H), 0.66 (dd,  $J=26.2, 12.0, 2$ H), 0.47 – 0.39 (m, 0.81H), 0.37 (d,  $J=6.7, 2$ H), 0.31 (d,  $J=5.7, 3$ H); **<sup>13</sup>C {<sup>1</sup>H} NMR (126 MHz, CDCl<sub>3</sub>)** δ = 156.2 (d,  $J=154.1$ ), 141.6 (dd,  $J=10.9, 6.0$ ), 137.1 (s), 136.9 (s), 135.4 (d,  $J=4.5$ ), 133.9 (d,  $J=6.5$ ), 133.7 (s), 133.0 (d,  $J=10.3$ ), 132.8 (d,  $J=11.0$ ), 130.6 (d,  $J=5.0$ ), 130.3 (d,  $J=2.4$ ), 129.6 (d,  $J=2.9$ ), 129.4 (s), 129.2 (s), 129.2 (s), 129.1 (s), 128.9 (s), 128.8 (s), 126.9 (s), 126.7 (s), 126.6 (s), 126.2 (s), 120.4 (s), 111.4 (s), 69.8 (d,  $J=83.6$ ), 44.3 (d,  $J=3.9$ ), 43.3 (s), 42.8 (s), 35.4 (s), 34.3 (s), 32.9 (d,  $J=16.6$ ), 31.8 (s), 27.9 (dd,  $J=24.8, 2.2$ ), 24.7 (d,  $J=9.5$ ), 22.0 (s), 21.4 (s), 21.1 (d,  $J=5.5$ ), 14.9 (s). **HRMS (ESI<sup>+</sup>)** Calcd. for C<sub>38</sub>H<sub>45</sub>O<sub>2</sub>PS [M+Na<sup>+</sup>]: 619.2776, Found: 619.2784.

**S<sub>P</sub>-S-(3-Methoxybenzyl)-((-)-menthyl)(2'-((3-methoxybenzyl)oxy)-[1,1'-biphenyl]-2-yl)**

**phosphinothioate (S<sub>P</sub>-4k)**

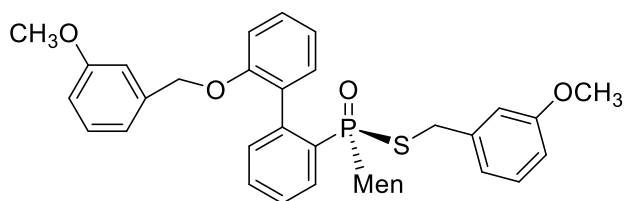

The crude **Sp-4k** was obtained from 3-methoxybenzyl chloride, and the pure compound was obtained as a colorless oil (27.7 mg, 34%, <1:99 dr<sub>P</sub> and 83:17

dr<sub>A</sub>) from preparative TLC (silica gel, petroleum ether/ethyl acetate = 3/1 as eluent); <sup>31</sup>P NMR (202 MHz, CDCl<sub>3</sub>) δ = 65.66 (s, 83%), 61.34 (s, 17%); <sup>1</sup>H NMR (500 MHz, CDCl<sub>3</sub>) δ = 8.14 – 7.93 (m, 1H), 7.67 (dd, *J*=7.5, 1.6, 0.83H), 7.53 – 7.45 (m, 1H), 7.36 (dddd, *J*=18.8, 11.0, 5.5, 3.5, 3H), 7.21 – 7.06 (m, 3H), 7.02 (d, *J*=8.1, 1H), 6.99 – 6.97 (m, 0.17H), 6.95 (d, *J*=7.7, 1H), 6.91 (d, *J*=2.1, 1H), 6.79 – 6.68 (m, 3H), 6.60 (s, 1H), 5.04 (ddd, *J*=44.7, 27.6, 12.4, 2H), 4.11 (dd, *J*=20.1, 10.0, 1.6H), 3.99 – 3.81 (m, 0.4H), 3.70 (d, *J*=16.8, 3H), 3.63 (d, *J*=7.4, 3H), 2.69 – 2.59 (m, 0.83H), 2.53 – 2.43 (m, 0.17H), 2.03 – 1.98 (m, 0.17H), 1.71 – 1.54 (m, 6H), 1.45 (d, *J*=5.7, 1H), 1.11 (s, 1H), 0.79 (dd, *J*=10.6, 7.0, 3H), 0.74 (d, *J*=6.5, 1H), 0.62 (s, 1H), 0.49 – 0.38 (m, 0.83H), 0.35 (d, *J*=6.7, 2H), 0.30 (d, *J*=6.8, 1H), 0.26 (d, *J*=5.6, 2H); <sup>13</sup>C {<sup>1</sup>H} NMR (126 MHz, CDCl<sub>3</sub>) δ = 159.7 (d, *J*=2.4), 155.5 (s), 141.7 (d, *J*=9.1), 140.0 (s), 138.5 (s), 134.0 (s), 133.2 (s), 133.1 (s), 132.8 (s), 132.7 (s), 130.4 (d, *J*=2.4), 129.6 (s), 129.5 (d, *J*=2.1), 129.5 (s), 129.3 (s), 126.6 (d, *J*=12.1), 121.6 (s), 120.5 (s), 118.2 (s), 114.4 (s), 113.6 (s), 113.4 (s), 111.2 (s), 110.8 (s), 69.5 (d, *J*=106.7), 56.7 – 53.1 (m), 44.3 (d, *J*=4.0), 43.4 (s), 42.8 (s), 35.5 (s), 34.3 (s), 33.1 (d, *J*=16.6), 32.08 (d, *J*=1.6), 29.73 (s), 27.8 (d, *J*=2.0), 24.6 (d, *J*=14.8), 21.9 (s), 21.4 (s), 14.9 (d, *J*=6.1).

HRMS (ESI<sup>+</sup>) Calcd. for C<sub>38</sub>H<sub>45</sub>O<sub>4</sub>PS [M+Na<sup>+</sup>]: 651.2674, Found: 651.2684.

**Sp-S-(4-Chlorobenzyl)-(2'-((4-chlorobenzyl)oxy)-[1,1'-biphenyl]-2-yl)((-)-menthyl)**

**phosphinothioate (Sp-4l)**

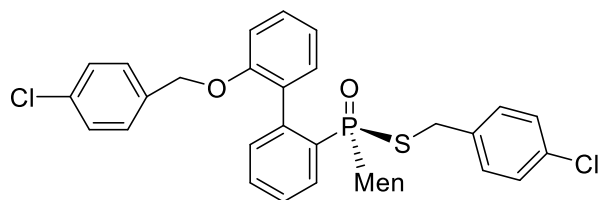

The crude **Sp-4l** was obtained from 4-chlorobenzyl chloride, and the pure compound was obtained as a colorless oil (40.5 mg, 49%, <1:99 dr<sub>P</sub> and 76:24 dr<sub>A</sub>)

from preparative TLC (silica gel, petroleum ether/ethyl acetate = 3/1 as eluent); <sup>31</sup>P NMR (202 MHz, CDCl<sub>3</sub>) δ = 65.66 (s, 76%), 62.05 (s, 24%); <sup>1</sup>H NMR (500 MHz, CDCl<sub>3</sub>) δ = 7.99 (ddd, *J*=14.4, 8.2, 1.2, 0.76H), 7.87 – 7.81 (m, 0.24H), 7.65 (dd, *J*=7.5, 1.7, 0.76H), 7.50 (dd, *J*=7.5, 1.4, 1H), 7.36 (ddd, *J*=7.7, 4.8, 1.2, 2H), 7.29 (d, *J*=8.5, 2H), 7.24 – 7.18 (m, 3H), 7.16 (d, *J*=8.5, 0.24H), 7.10 (d, *J*=7.5, 2H), 7.06 (d, *J*=8.5, 1H), 7.00 (dt, *J*=8.2, 2.8, 3H), 4.97 (d, *J*=18.2, 2H),

4.13 – 4.06 (m, 1.48H), 3.86 (dd,  $J=9.0, 7.7, 0.52\text{H}$ ), 2.64 – 2.55 (m, 0.76H), 2.53 – 2.44 (m, 0.24H), 2.04 – 1.97 (m, 0.24H), 1.69 – 1.52 (m, 6H), 1.47 (d,  $J=6.1, 1\text{H}$ ), 1.15 – 1.01 (m, 1H), 0.80 (d,  $J=6.9, 1\text{H}$ ), 0.76 (t,  $J=7.4, 3\text{H}$ ), 0.63 (t,  $J=9.9, 1\text{H}$ ), 0.48 – 0.39 (m, 0.76H), 0.35 (d,  $J=6.7, 2\text{H}$ ), 0.30 (d,  $J=5.7, 3\text{H}$ );  $^{13}\text{C}$  { $^1\text{H}$ } NMR (126 MHz,  $\text{CDCl}_3$ )  $\delta = 155.4$  (s), 141.5 (d,  $J=9.2$ ), 137.3 (d,  $J=3.6$ ), 135.4 (s), 133.9 (s), 133.5 (s), 133.3 (s), 133.1 (s), 133.0 (s), 132.9 (s), 132.7 (d,  $J=11.0$ ), 130.7 (s), 130.5 (s), 130.5 (d,  $J=2.8$ ), 129.7 (d,  $J=3.3$ ), 129.5 (d,  $J=6.4$ ), 128.6 (s), 128.5 (s), 128.4 (d,  $J=13.2$ ), 128.3 (s), 127.5 (s), 126.7 (d,  $J=12.3$ ), 120.9 (s), 111.7 (s), 69.3 (s), 44.3 (d,  $J=3.9$ ), 43.1 (d,  $J=65.9$ ), 35.4 (s), 34.4 (s), 33.0 (d,  $J=16.6$ ), 31.3 (d,  $J=2.1$ ), 27.9 (d,  $J=2.3$ ), 24.6 (d,  $J=14.7$ ), 22.0 (s), 21.5 (s), 14.9 (d,  $J=5.4$ ). HRMS (ESI<sup>+</sup>) Calcd. for  $\text{C}_{36}\text{H}_{39}\text{Cl}_2\text{O}_2\text{PS}$  [ $\text{M}+\text{Na}^+$ ]: 659.1683, Found: 659.1693.

### The reaction of **S<sub>P</sub>-3** with benzyl bromide.

#### Typical procedure:

To the solution of **S<sub>P</sub>-3** (80.0 mg, 0.205 mmol) and potassium hydroxide (14.9 mg, 0.225 mmol) in acetonitrile (1 mL), was added benzyl bromide (100.4  $\mu\text{L}$ , 0.822 mmol) and the mixture was stirred at 50 °C for 8 hours. After the reaction was completed, as monitored with TLC, saturated solution of ammonium chloride (10 mL) was added. The mixture was extracted with dichloromethane (3 $\times$ 10 mL), washed with water (3 $\times$ 10 mL), dried over magnesium sulfate. After removing the solvents, the residue was purified with preparative TLC (silica gel, petroleum ether/ethyl acetate = 1/1 as eluent) to afford **S<sub>P</sub>-6h** (63.7 mg, 70%, <1:99 dr<sub>P</sub> and 68:32 dr<sub>A</sub>).

#### **S<sub>P</sub>-O-Benzyl-(2'-(Benzyloxy)-[1,1'-biphenyl]-2-yl)((-)-Menthyl)phosphinothioate (**S<sub>P</sub>-6h**)**

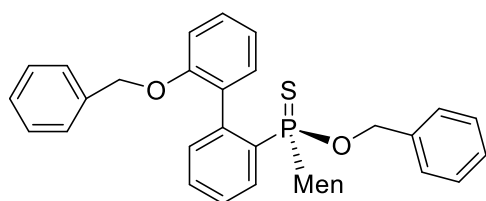

The crude **S<sub>P</sub>-6h** was obtained from benzyl bromide, and the pure compound was obtained as a colorless oil (63.7 mg, 70%, <1:99 dr<sub>P</sub> and 68:32 dr<sub>A</sub>) from preparative TLC (silica gel, petroleum ether/ethyl

acetate = 3/1 as eluent);  $^{31}\text{P}$  NMR (202 MHz,  $\text{CDCl}_3$ )  $\delta = 50.07$  (s, 68%), 46.43 (s, 32%);  $^1\text{H}$  NMR (500 MHz,  $\text{CDCl}_3$ )  $\delta = 7.95 - 7.85$  (m, 0.32H), 7.80 – 7.71 (m, 0.68H), 7.65 (d,  $J=7.4, 0.68\text{H}$ ), 7.52 (d,  $J=7.6, 1\text{H}$ ), 7.38 (td,  $J=16.2, 8.3, 6\text{H}$ ), 7.33 – 7.27 (m, 2H), 7.25 – 7.17 (m, 4H), 7.08 (t,  $J=7.7, 2\text{H}$ ), 6.96 (d,  $J=8.0, 1\text{H}$ ), 6.86 (t,  $J=7.4, 0.32\text{H}$ ), 5.23 (dd,  $J=12.0, 7.8, 0.68\text{H}$ ), 5.08 (s, 0.68H), 5.06 – 5.03 (m, 0.64H), 4.93 (dd,  $J=59.8, 12.2, 1.36\text{H}$ ), 4.76 – 4.71 (m, 0.32H), 4.70 (s, 0.32H), 2.53 (s, 0.68H), 2.32 (s, 0.32H), 1.68 (d,  $J=6.6, 1\text{H}$ ), 1.62 – 1.42 (m, 2H), 1.41 –

1.23 (m, 3H), 0.71 (dd,  $J=36.7, 6.7, 7\text{H}$ ), 0.37 (dd,  $J=15.3, 5.9, 4\text{H}$ ), 0.21 (d,  $J=6.8, 1\text{H}$ );  $^{13}\text{C}$  { $^1\text{H}$ } NMR (126 MHz,  $\text{CDCl}_3$ )  $\delta = 155.9$  (d,  $J=75.2$ ), 141.6 (d,  $J=11.9$ ), 137.5 (d,  $J=6.1$ ), 137.4 (s), 136.9 (s), 133.4 (s), 132.7 (d,  $J=7.0$ ), 132.4 (d,  $J=11.7$ ), 131.7 (d,  $J=6.6$ ), 131.1 (s), 130.5 (d,  $J=2.0$ ), 129.7 (d,  $J=3.1$ ), 129.2 (d,  $J=4.5$ ), 128.4 (s), 128.3 (s), 128.2 (s), 127.9 (d,  $J=5.4$ ), 127.6 (s), 127.4 (s), 126.8 (s), 126.7 (d,  $J=6.5$ ), 126.1 (s), 120.1 (d,  $J=58.8$ ), 111.9 (d,  $J=114.1$ ), 69.7 (d,  $J=84.1$ ), 65.8 (d,  $J=6.0$ ), 42.9 (d,  $J=4.4$ ), 40.3 (d,  $J=94.4$ ), 35.7 (d,  $J=1.5$ ), 34.4 (d,  $J=4.1$ ), 32.9 (d,  $J=15.5$ ), 28.2 (d,  $J=1.6$ ), 24.6 (d,  $J=14.5$ ), 22.3 (d,  $J=50.6$ ), 21.4 (d,  $J=24.8$ ), 14.9 (d,  $J=31.1$ ).

HRMS (ESI<sup>+</sup>) Calcd. for  $\text{C}_{36}\text{H}_{41}\text{O}_2\text{PS}$  [ $\text{M}+\text{Na}^+$ ]: 591.2463, Found: 591.2447.

***S*<sub>P</sub>-*O*-(2-Methylbenzyl)-((-)-menthyl)(2'-((2-methylbenzyl)oxy)-[1,1'-biphenyl]-2-yl)phosphinothioate (*S*<sub>P</sub>-6i)**

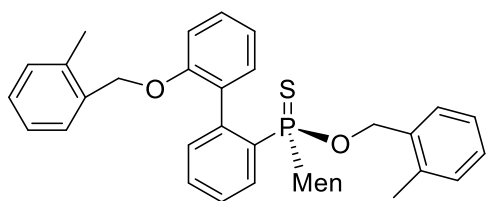

The crude *S*<sub>P</sub>-6i was obtained from 2-methylbenzyl bromide, and the pure compound was obtained as a colorless oil (19.3 mg, 25%, <1:99 dr<sub>P</sub> and 71:29 dr<sub>A</sub>) from preparative TLC (silica gel, petroleum

ether/ethyl acetate = 1/1 as eluent);  $^{31}\text{P}$  NMR (202 MHz,  $\text{CDCl}_3$ )  $\delta = 49.38$  (s, 71%), 46.26 (s, 29%);  $^1\text{H}$  NMR (500 MHz,  $\text{CDCl}_3$ )  $\delta = 7.89$  (dd,  $J=11.4, 7.8, 0.29\text{H}$ ), 7.79 (dd,  $J=10.8, 7.8, 0.71\text{H}$ ), 7.61 (dd,  $J=7.5, 1.6, 0.71\text{H}$ ), 7.54 – 7.47 (m, 1H), 7.44 – 7.38 (m, 1H), 7.35 (ddd,  $J=17.1, 8.2, 1.2, 3\text{H}$ ), 7.23 – 7.17 (m, 2H), 7.17 – 7.12 (m, 2H), 7.11 – 7.05 (m, 2H), 7.00 (dd,  $J=11.6, 5.1, 2\text{H}$ ), 6.89 (d,  $J=7.6, 1\text{H}$ ), 6.85 (t,  $J=7.4, 0.29\text{H}$ ), 5.18 (dd,  $J=12.4, 6.4, 0.58\text{H}$ ), 5.01 (ddd,  $J=20.8, 13.0, 5.9, 1.42\text{H}$ ), 4.86 (d,  $J=12.4, 0.58\text{H}$ ), 4.70 (dd,  $J=12.2, 3.5, 1.42\text{H}$ ), 2.49 (dt,  $J=6.6, 4.2, 0.71\text{H}$ ), 2.30 (s, 0.29H), 2.23 (d,  $J=8.1, 3\text{H}$ ), 2.19 (s, 1H), 2.13 (s, 2H), 1.76 (dd,  $J=6.3, 4.4, 1\text{H}$ ), 1.55 (dddd,  $J=25.4, 22.2, 12.6, 7.4, 2\text{H}$ ), 1.44 – 1.22 (m, 3H), 0.86 – 0.58 (m, 7H), 0.46 – 0.33 (m, 4H), 0.18 (d,  $J=6.8, 1\text{H}$ );  $^{13}\text{C}$  { $^1\text{H}$ } NMR (126 MHz,  $\text{CDCl}_3$ )  $\delta = 156.0$  (d,  $J=51.1$ ), 142.1 (dd,  $J=85.3, 10.7$ ), 136.5 (d,  $J=32.6$ ), 135.6 (d,  $J=6.9$ ), 134.9 (s), 134.9 (s), 133.1 (s), 132.4 (d,  $J=11.6$ ), 132.0 (d,  $J=7.0$ ), 131.2 (s), 130.6 (d,  $J=2.0$ ), 130.1 (s), 129.9 (s), 129.9 (d,  $J=9.2$ ), 129.2 (d,  $J=6.1$ ), 128.6 (s), 128.0 (d,  $J=2.6$ ), 127.9 (s), 127.4 (s), 126.8 (d,  $J=10.8$ ), 126.5 (s), 125.9 (s), 125.8 (s), 120.1 (d,  $J=55.2$ ), 111.9 (d,  $J=75.0$ ), 68.2 (d,  $J=111.5$ ), 63.7 (dd,  $J=52.8, 6.5$ ), 43.1 (d,  $J=4.0$ ), 41.0 (s), 40.2 (s), 35.7 (d,  $J=2.1$ ), 34.5 (s), 32.9 (d,  $J=15.3$ ), 28.3 (d,  $J=1.7$ ), 24.7 (d,  $J=14.7$ ), 22.2 (s), 21.4 (d,  $J=18.4$ ), 18.8 (dd,  $J=15.0, 5.2$ ), 14.9 (d,  $J=40.1$ ).

HRMS (ESI<sup>+</sup>) Calcd. for  $\text{C}_{38}\text{H}_{45}\text{O}_2\text{PS}$  [ $\text{M}+\text{Na}^+$ ]: 619.2776, Found: 619.2782.

### Part 3. Cleavage of P-S bond of *S<sub>P</sub>*-4b bond with Grignard reagents.

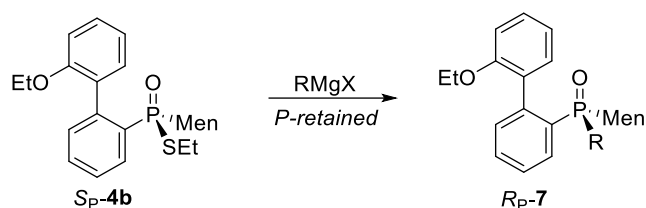

#### Typical procedure:

The solution of **S<sub>P</sub>-4b** (50 mg, 0.112 mmol) was dissolved in THF (1 mL) under N<sub>2</sub>, and the *n*-butyl magnesium bromide (0.8 M solution in THF, 0.29 mL, 0.23 mmol) was added dropwise at 0 °C. The solution was stirred at 50 °C for 8 hours, and monitored with NMR spectrum, which indicated the reaction didn't occur. Toluene (1 mL) was added and the solution was stirred at 90 °C for 12 hours. Saturated solution of ammonium chloride (5 mL) was added. The mixture was extracted with dichloromethane (3×5 mL), washed with water (3×5 mL), dried over magnesium sulfate. After removing solvents, the residue was purified with preparative TLC (silica gel, petroleum ether/ethyl acetate = 1/1 as eluent) to afford **R<sub>P</sub>-7c** (13.8 mg, 28.9%, >99:1 dr<sub>P</sub> and 51:49 dr<sub>A</sub>).

#### **R<sub>P</sub>**-Butyl (2'-ethoxy-[1,1'-biphenyl]-2-yl) ((-)-menthyl) phosphine oxide (**R<sub>P</sub>-7c**)

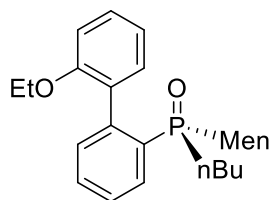

The crude **R<sub>P</sub>-7c** was obtained from *n*-butyl magnesium bromide, and the pure compound was obtained as white solid (13.8 mg, 29%, >99:1 dr<sub>P</sub> and 51:49 dr<sub>A</sub>) from preparative TLC (silica gel, petroleum ether/ethyl acetate = 1/1 as eluent), The compound had the same spectrum to that obtained as below.

#### **R<sub>P</sub>**-(2'-Ethoxy-[1,1'-biphenyl]-2-yl) (methyl) ((-)-menthyl) phosphine oxide (**R<sub>P</sub>-7a**)

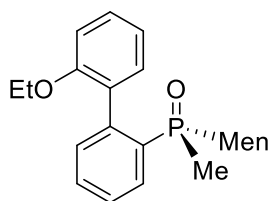

The crude **R<sub>P</sub>-7a** was obtained from methyl magnesium iodide, and the pure compound was obtained as white solid (13.2 mg, 29.7%, >99:1 dr<sub>P</sub> and 69:31 dr<sub>A</sub>) from preparative TLC (silica gel, petroleum ether/ethyl acetate = 1/1 as eluent), The compound had the same spectrum to that obtained as below.



## Part 4. Exploring the mechanism of cleavage of P-S/C-S bonds

### A. The regio-selective cleavage of P-S or C-S bond of biphenylphosphinothioate.

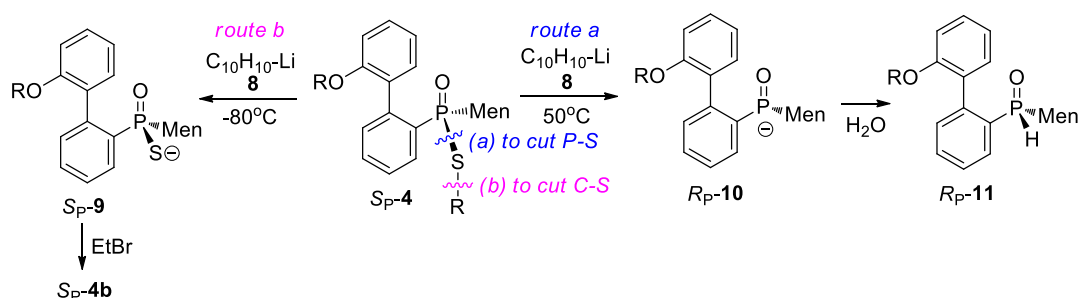

### Preparations of naphthalene-lithium solution 8.

**Naphthalene:Li = 1.5:1**, The naphthalene-lithium solution **8** was prepared from stirring of naphthalene (961.4 mg, 7.5 mmol) and lithium (34.7 mg, 5 mmol) in THF (5 mL) at room temperature for 3 hours, as a 1 M solution based on lithium.

**Naphthalene:Li = 0.9:1**, The naphthalene-lithium solution **8** was prepared from stirring of naphthalene (691.2 mg, 5.4 mmol) and lithium (41.6 mg, 6 mmol) in THF (5 mL) at room temperature for 3 hours, as a 1M solution based on naphthalene.

### Typical procedure (for entry 6 of Table 2):

**S<sub>P</sub>-4b** (50 mg, 0.11 mmol) was dissolved in THF (1 ml), and excess naphthalene of lithium-naphthalene **8** (naphthalene:Li = 1.5:1, 0.23 ml, 1 M, 0.23 mmol) was added at  $50^{\circ}\text{C}$  for 0.5 h. After cooling, the sample was analyzed with NMR spectrum. Two peaks at 36.63 (50%) and 33.87 ppm (49%) were observed, which were assigned as **R<sub>P</sub>-11**. The conversion of **S<sub>P</sub>-4b** was 99% and the ratio of **S<sub>P</sub>-9/R<sub>P</sub>-10** was 1:99.

### (*R<sub>P</sub>*)-(-)-Menthyl (2'-ethoxy-[1,1'-biphenyl]-2-yl)phosphine oxide (**R<sub>P</sub>-11**)

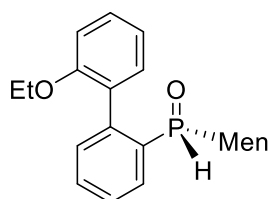

**R<sub>P</sub>-11** was obtained as white solid (41.9 mg, 99%, >99:1 dr<sub>P</sub> and 52:48 dr<sub>A</sub>) from preparative TLC (silica gel, hexane/ethyl acetate = 1/3 as eluent), m.p.  $100.3 - 102.0^{\circ}\text{C}$ ;  $^{31}\text{P}$  NMR (162 MHz,  $\text{CDCl}_3$ )  $\delta = 36.63$  (s, 52%), 33.87 (s, 48%);  $^1\text{H}$  NMR (400 MHz,  $\text{CDCl}_3$ )  $\delta = 8.14 - 7.96$  (m, 1H), 7.82 (s, 0.24H), 7.64 (s, 0.26H), 7.52 (dd,  $J=18.0$ , 6.8, 2H), 7.36 (t,  $J=7.7$ , 1H), 7.30 - 7.11 (m, 2H), 6.99 (dt,  $J=17.7$ , 8.0, 2H), 6.63 (s, 0.24H), 6.44 (s, 0.26H), 4.09 - 3.87 (m, 2H), 2.17 - 1.96 (m, 1H), 1.58 (d,  $J=7.7$ , 3H), 1.45 (s, 1H), 1.25 (t,  $J=7.0$ , 3H), 1.09 - 0.90 (m, 2H), 0.84 (d,  $J=6.3$ , 2H), 0.80 (d,  $J=6.7$ , 3H), 0.73 (d,  $J=4.5$ , 4H), 0.30 (t,  $J=6.3$ , 3H);  $^{13}\text{C}$  [ $^1\text{H}$ ] NMR

(101 MHz, CDCl<sub>3</sub>)  $\delta$  = 155.6 (d,  $J=63.3$ ), 141.5 – 140.1 (m), 131.5 (s), 131.5 (s), 131.2 (d,  $J=11.8$ ), 130.7 (s), 130.5 (d,  $J=9.5$ ), 129.8 (s), 128.6 (s), 127.3 (t,  $J=9.9$ ), 120.5 (d,  $J=36.9$ ), 111.9 (d,  $J=26.0$ ), 63.7 (d,  $J=43.8$ ), 42.5 (d,  $J=3.4$ ), 39.9 (d,  $J=19.9$ ), 37.7 (s), 36.9 (s), 33.9 (s), 33.4 (dd,  $J = 51.9, 16.2$ ), 28.7 (d,  $J=28.3$ ), 24.3 (dd,  $J=24.8, 12.7$ ), 22.2 (d,  $J=10.3$ ), 21.5 (d,  $J=12.0$ ), 14.8 (d,  $J=41.5$ ). HRMS (ESI<sup>+</sup>) Calcd for C<sub>24</sub>H<sub>34</sub>O<sub>2</sub>P [M+H<sup>+</sup>]: 385.2296, Found: 385.2318.

**Entry 1 of Table 2:** The mixture of **Sp-4b** (50 mg, 0.11 mmol) and lithium (1.52 mg, 0.23 mmol) was stirred in THF (1 mL) at 0 °C to room temperature for 6 hours. Five peaks located at 98.57 (**Sp-9**, 27%), 66.33 (36%)/60.98 (7%) (**Sp-4b**), and 38.87 (16%)/34.82 (14%) ppm (**Rp-11**). The conversion of **Sp-4b** was 57% and the ratio of **Sp-9/ Rp-10** was 46:54.

**Entry 2 of Table 2:** The mixture of **Sp-4b** (50 mg, 0.11 mmol) and lithium-naphthalene **8** (naphthalene:Li = 0.9:1, 0.23 ml, 1 M, 0.23 mmol) was stirred at room temperature for 5 hours. Three peaks were observed to located at 98.60 (58%), 36.46 (22%)/34.10 (20%) ppm. The conversion of **Sp-4b** was 99% and the ratio of **Sp-9/ Rp-10** was 58:42.

**Entry 3 of Table 2:** The mixture of **Sp-4b** (50 mg, 0.11 mmol) and lithium-naphthalene **8** (naphthalene:Li = 0.9:1, 0.23 ml, 1 M, 0.23 mmol) was stirred at 50 °C for 1 hours. Five peaks were observed to located at 97.89 (50%), 65.66 (9%) /60.17 (2%), 36.27 (19%)/33.80 (20%) ppm. The conversion of **Sp-4b** was 89% and ratio of **Sp-9/ Rp-10** was 44:56.

**Entry 4 of Table 2:** The mixture of **Sp-4b** (50 mg, 0.11 mmol) and lithium-naphthalene **8** (naphthalene:Li = 0.9:1, 0.23 ml, 1 M, 0.23 mmol) was stirred at -80 °C for 8 hours. The peaks were observed to located at 98.64 (31%), 67.63 (27%) /60.47 (6%), 52.37 (unknown product, 26%), 48.96 ppm (unknown product, 11%). The conversion of **Sp-4b** was 69% and the ratio **Sp-9/ Rp-10** was 99:1.

**Entry 5 of Table 2:** The mixture of **Sp-4b** (50 mg, 0.11 mmol) and lithium-naphthalene **8** (naphthalene:Li = 1.5:1, 0.23 ml, 1 M, 0.23 mmol) was stirred at room temperature for 3 hours. Three peaks were observed, 97.81 (6%), 36.70 (48%)/33.62 (46%) ppm. The conversion of **Sp-4b** was 99% and the ratio of **Sp-9/ Rp-10** was 6:94.

**Entry 7 of Table 2:** The mixture of **Sp-4b** (50 mg, 0.11 mmol) and lithium-naphthalene **8** (naphthalene:Li = 1.5:1, 0.23 ml, 1 M, 0.23 mmol) was stirred at -80 °C for 5 hours. Five peaks were observed, 97.97 (38%), 65.56 (12%)/60.06 (4%), 52.49 (31%)/49.29 (16%) ppm (the peaks of 52.49/49.29 was speculated to be phosphoric acid, but was not confirmed). The conversion of

**S<sub>P</sub>-4b** was 84% and the ratio of **S<sub>P</sub>-9/R<sub>P</sub>-10** was 99:1.

**Entry 8 of Table 2:** The mixture of **S<sub>P</sub>-4e** (50 mg, 0.11 mmol) and lithium-naphthalene **8** (naphthalene:Li = 0.9:1, 0.22 ml, 1 M, 0.22 mmol) was stirred at -80 °C for 8 hours. Four peaks were observed, 97.97 (52%), 67.89 (unknown product, 9%), 66.08 (33%)/59.54 (6%) ppm (**S<sub>P</sub>-4e**). The conversion of **S<sub>P</sub>-4e** was 60% and the ratio of **S<sub>P</sub>-9/R<sub>P</sub>-10** was 99:1.

**Entry 9 of Table 2:** The mixture of **S<sub>P</sub>-4j** (50 mg, 0.08 mmol) and lithium-naphthalene **8** (naphthalene:Li = 0.9:1, 0.16 ml, 1 M, 0.16 mmol) was stirred at -80 °C for 8 hours. Four peaks were observed, 98.69 (57%), 53.39 (unknown product, 21%), 49.78 (unknown product, 10%), 44.83 ppm (unknown product, 12%). The conversion of **S<sub>P</sub>-4j** was 99% and the ratio of **S<sub>P</sub>-9/R<sub>P</sub>-10** was 99:1.

**Entry 10 of Table 2:** The mixture of **S<sub>P</sub>-4g** (50 mg, 0.08 mmol) and lithium-naphthalene **8** (naphthalene:Li = 0.9:1, 0.16 ml, 1 M, 0.16 mmol) was stirred at -80 °C for 8 hours. Four peaks were observed, 98.89 (51%), 51.74 (unknown product, 15%), 50.71 (unknown product, 17%), 43.46 ppm (16%). The conversion of **S<sub>P</sub>-4g** was 99% and the ratio of **S<sub>P</sub>-9/R<sub>P</sub>-10** was 99:1.

**Entry 11 of Table 2:** The mixture of **S<sub>P</sub>-4m** (50 mg, 0.10 mmol) and lithium-naphthalene **8** (naphthalene:Li = 0.9:1, 0.21 ml, 1 M, 0.21 mmol) was stirred at room temperature for 3 hours. Three peaks were observed, 39.21 (unknown, 2%), 35.75 (52%)/32.48 (46%) ppm. The conversion of **S<sub>P</sub>-4m** was 98% and the ratio of **S<sub>P</sub>-9/R<sub>P</sub>-10** was 1:99.

**Entry 12 of Table 2:** The mixture of **S<sub>P</sub>-4m** (50 mg, 0.10 mmol) and lithium-naphthalene **8** (naphthalene:Li = 1.5:1, 0.21 ml, 1 M, 0.21 mmol) was stirred at room temperature for 3 hours. Four peaks were observed, 62.70 (5%)/58.55 (2%) (**S<sub>P</sub>-4m**), 37.04 (48%)/33.99 (45%) ppm. The conversion of **S<sub>P</sub>-4m** was 93% and the ratio of **S<sub>P</sub>-9/R<sub>P</sub>-10** was 1:99.

**Entry 13 of Table 2:** The mixture of **S<sub>P</sub>-4m** (50 mg, 0.10 mmol) and lithium-naphthalene **8** (naphthalene:Li = 0.9:1, 0.21 ml, 1 M, 0.21 mmol) was stirred at -80 °C for 8 hours. Six peaks were observed, 62.12 (3%)/57.94 (1%), 52.17 (67%)/49.34 (28%), 36.39 (1%)/33.21 (1%) ppm. The conversion of **S<sub>P</sub>-4m** was 96% and two unidentified peaks at 52.17 and 49.34 ppm were observed.

## **B. To capture S<sub>P</sub>-9 with the formation of**

### **S<sub>P</sub>-S-methyl-(2'-ethoxy-[1,1'-biphenyl]-2-yl)((-)-menthyl) phosphinothioate.**

**S<sub>P</sub>-4b** (50 mg, 0.11 mmol) was dissolved in THF (1 ml) and the solution was cooled to -80 °C.

Lithium-naphthalene **8** (naphthalene:Li = 0.9:1, 0.23 ml, 1 M, 0.23 mmol) was added and the mixture was stirred for 5 h. After the solution was warmed to room temperature, methyl iodide (14.3  $\mu$ L, 0.23 mmol) was added with stirring for 3 h. Saturated solution of ammonium chloride (5 mL) was added. The mixture was extracted with dichloromethane (3 $\times$ 5 mL), washed with water (3 $\times$ 5 mL), dried over magnesium sulfate. After removing the solvents, the residue was purified with preparative TLC (silica gel, petroleum ether/ethyl acetate = 3/1 as eluent) to afford *S<sub>P</sub>*-*S*-methyl-(2'-methoxy-[1,1'-biphenyl]-2-yl)((-)-menthyl) phosphinothioate (21.3 mg, 45%, <1:99 *dr<sub>P</sub>* and 77:23 *dr<sub>A</sub>*).

***S<sub>P</sub>*-*S*-Methyl-(2'-ethoxy-[1,1'-biphenyl]-2-yl)((-)-menthyl) phosphinothioate *S<sub>P</sub>*-4a**

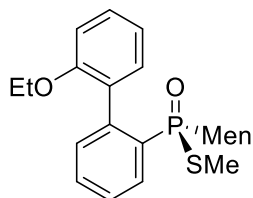

The pure *S<sub>P</sub>*-**4a** was obtained as a colorless oil (21.3 mg, 45%, <1:99 *dr<sub>P</sub>* and 77:23 *dr<sub>A</sub>*) from preparative TLC (silica gel, petroleum ether/ethyl acetate = 3/1 as eluent); <sup>31</sup>P NMR (202 MHz, CDCl<sub>3</sub>)  $\delta$  = 65.79 (s, 77%), 61.18 (s, 23%); <sup>1</sup>H NMR (500 MHz, CDCl<sub>3</sub>)  $\delta$  = 8.15 (dd, *J*=14.2, 7.6 Hz, 0.77H), 8.05 (dd, *J*=13.3, 7.7 Hz, 0.23H), 7.60 (dd, *J*=7.5, 1.6 Hz, 0.77H), 7.52 – 7.44 (m, 1H), 7.41 (dd, *J*=10.6, 4.6 Hz, 1H), 7.32 (dt, *J*=12.5, 3.2 Hz, 2H), 7.13 (dd, *J*=7.3, 1.4 Hz, 0.23H), 7.01 (t, *J*=7.4 Hz, 1H), 6.92 (dd, *J*=8.2, 3.8 Hz, 1H), 4.08 – 3.88 (m, 2H), 2.55 (dt, *J*=13.4, 6.7 Hz, 0.77H), 2.49 – 2.39 (m, 0.23H), 2.33 (d, *J*=10.2 Hz, 2.31H), 2.19 (d, *J*=10.5 Hz, 0.69H), 1.60 (dd, *J*=11.2, 5.3 Hz, 4H), 1.20 (dd, *J*=8.9, 5.0 Hz, 5H), 0.88 – 0.78 (m, 4H), 0.71 (d, *J*=6.5 Hz, 4H), 0.55 (s, 1H), 0.33 (dd, *J*= 9.6, 6.9 Hz, 3H); <sup>13</sup>C {<sup>1</sup>H} NMR (126 MHz, CDCl<sub>3</sub>)  $\delta$  = 156.5 (d, *J*=97.8), 141.9 (t, *J*=32.1), 133.9 (s), 133.0 (s), 132.9 (s), 132.6 (d, *J*=4.7), 132.5 (s), 130.3 (d, *J*=2.6), 129.3 (d, *J*=9.2), 126.7 (d, *J*=11.9), 119.5 (d, *J*=81.2), 111.4 (d, *J*=119.3), 63.7 (d, *J*=46.3), 44.3 (d, *J*=3.6), 43.3 (s), 42.7 (s), 35.4 (s), 34.4 (d, *J*=9.6), 33.0 (d, *J*=16.6), 27.9 (d, *J*=2.4), 24.6 (d, *J*=14.7), 22.4 (s), 21.5 (d, *J*=5.7), 14.9 (s), 14.7 (s), 10.0 (d, *J*=2.7). HRMS (ESI<sup>+</sup>) Calcd. for C<sub>25</sub>H<sub>35</sub>O<sub>2</sub>P S[M+Na<sup>+</sup>]: 453.1993, Found: 453.2007.

### C. The regio-selective cleavage of P-S or C-S bond of phenyl phosphinothioates.

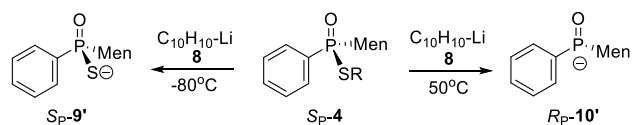

| entry | R of Sp-4 | Naph. (equiv) | Temp.  | Conversion of Sp-4 %<br>(Sp-9'/Rp-10') |
|-------|-----------|---------------|--------|----------------------------------------|
| 1     | 4n, Me    | 0.9           | -80 °C | 94 (99:1) <sup>a</sup>                 |
| 2     | 4o, Et    | 0.9           | -80 °C | 94 (99:1) <sup>a,b</sup>               |
| 3     | 4p, Ph    | 0.9           | -80 °C | 86 <sup>a</sup>                        |
| 4     | 4n, Me    | 1.5           | 50 °C  | 99 (42:58)                             |
| 5     | 4o, Et    | 1.5           | 50 °C  | 99 (47:53)                             |
| 6     | 4p, Ph    | 1.5           | 50 °C  | 98 (9:91) <sup>a</sup>                 |

<sup>a</sup> Major byproduct was observed at 49 ppm on <sup>31</sup>P NMR spectrum whose structure was not confirmed. <sup>b</sup> 4o was used in 67:33 dr, and 9' was detected as two stereoisomers in the corresponding ratio.

**Entry 1 of Scheme 6:** The mixture of Sp-4n (50 mg, 0.16 mmol) and lithium-naphthalene 8 (naphthalene:Li = 0.9:1, 0.33 ml, 1 M, 0.33 mmol) was stirred -80 °C for 8 hours. Four peaks were observed to located at 90.97 (39%) (Sp-9'), 62.12 (6%) (Sp-4n), 49.91 (62%, unconfirmed), 47.68 (3%) ppm. The conversion of Sp-4n was 94% and the ratio of Sp-9'/Rp-10' was 99:1.

**Entry 2 of Scheme 6:** The mixture of 4o/4o' (Sp/Rp = 67:33, 50 mg, 0.15 mmol) and lithium-naphthalene 8 (naphthalene:Li = 0.9:1, 0.31 ml, 1 M, 0.31 mmol) was stirred -80 °C for 8 hours. Six peaks were observed to located at 90.99 (32%)/87.78 (9%) (Sp-9'/Rp-9'=78:22), 62.08 (4%)/60.93(2%) (4o/4o'), 52.10 (4%), 49.81 (48%) ppm. The conversion of 4o/4o' was 94% and the ratio of Sp-9'/Rp-10' was 99:1.

**Entry 3 of Scheme 6:** The mixture of Sp-4p (50 mg, 0.13 mmol) and lithium-naphthalene 8 (naphthalene:Li = 0.9:1, 0.27 ml, 1 M, 0.27 mmol) was stirred -80 °C for 8 hours. Two peaks were observed to located at 58.01 (14%) (Sp-4p), 49.38 (86%) ppm. The conversion of Sp-4p was 86% and major byproduct was observed at 49 ppm on <sup>31</sup>P NMR spectrum whose structure was not confirmed.

**Entry 4 of Scheme 6:** The mixture of Sp-4n (50 mg, 0.16 mmol) and lithium-naphthalene 8 (naphthalene:Li = 1.5:1, 0.33 ml, 1 M, 0.33 mmol) was stirred 50 °C for 8 hours. Four peaks were observed to located at 89.82 (32%) (Sp-9'), 43.43 (22%, unknown), 33.49 (43%) (Rp-10'), 30.08 (2%) ppm. The conversion of Sp-4n was 99% and the ratio of Sp-9'/Rp-10' was 42:58.

**Entry 5 of Scheme 6:** The mixture of 4o/4o' (Sp/Rp=67:33, 50 mg, 0.15 mmol) and lithium-naphthalene 8 (naphthalene:Li = 1.5:1, 0.31 ml, 1 M, 0.31 mmol) was stirred 50 °C for 5 hours. Four peaks were observed to located at 90.63 (33%)/87.32 (14%) (Sp-9'/Rp-9'=71:29),

33.66 (33%)/31.08 (20%) (**10'**/**10**, **R<sub>P</sub>**/**S<sub>P</sub>** = 63:37) ppm. The conversion of **4o**/**4o'** was 99% and the ratio of **S<sub>P</sub>-9'**/**R<sub>P</sub>-10'** was 47:53.

**Entry 6 of Scheme 6:** The mixture of **S<sub>P</sub>-4p** (50 mg, 0.13 mmol) and lithium-naphthalene **8** (naphthalene:Li = 1.5:1, 0.27 ml, 1 M, 0.27 mmol) was stirred 50 °C for 8 hours. Five peaks were observed to located at 90.46 (6%) (**S<sub>P</sub>-9'**), 58.33 (2%), 49.59 (35%), 33.73 (36%)/28.79 (22%) (**10'**/**10**, **R<sub>P</sub>**/**S<sub>P</sub>** = 62:38) ppm. The conversion of **S<sub>P</sub>-4p** was 98% and the ratio of **S<sub>P</sub>-9'**/**R<sub>P</sub>-10'** was 9:91.

#### D. Cleavage of S-S bond of 1,2-diethyldisulfane.

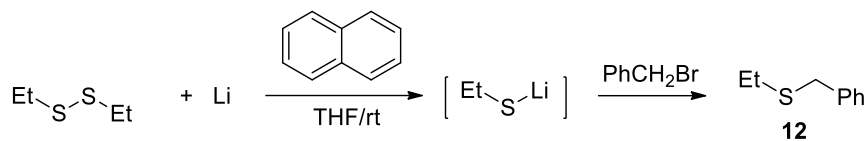

To the solution of 1,2-diethyldisulfane (0.1 ml, 0.818 mmol) in THF (1 mL), naphthalene-lithium **8** (naphthalene/Li = 0.9:1, 1.64 mL, 1 M, 1.64 mmol) was added dropwise at room temperature. After the solution was stirred for 0.5 hours, benzyl bromide (0.21 mL, 1.80 mmol) was added and the mixture was stirred at room temperature for 5 hours. Saturated solution of ammonium chloride (5 mL) was added. The mixture was extracted with dichloromethane (3×5 mL), washed with water (3×5 mL), dried over magnesium sulfate. After removing the solvents, the crude **12** was obtained in 99% yield, as seen its NMR spectrum (Figure S1).

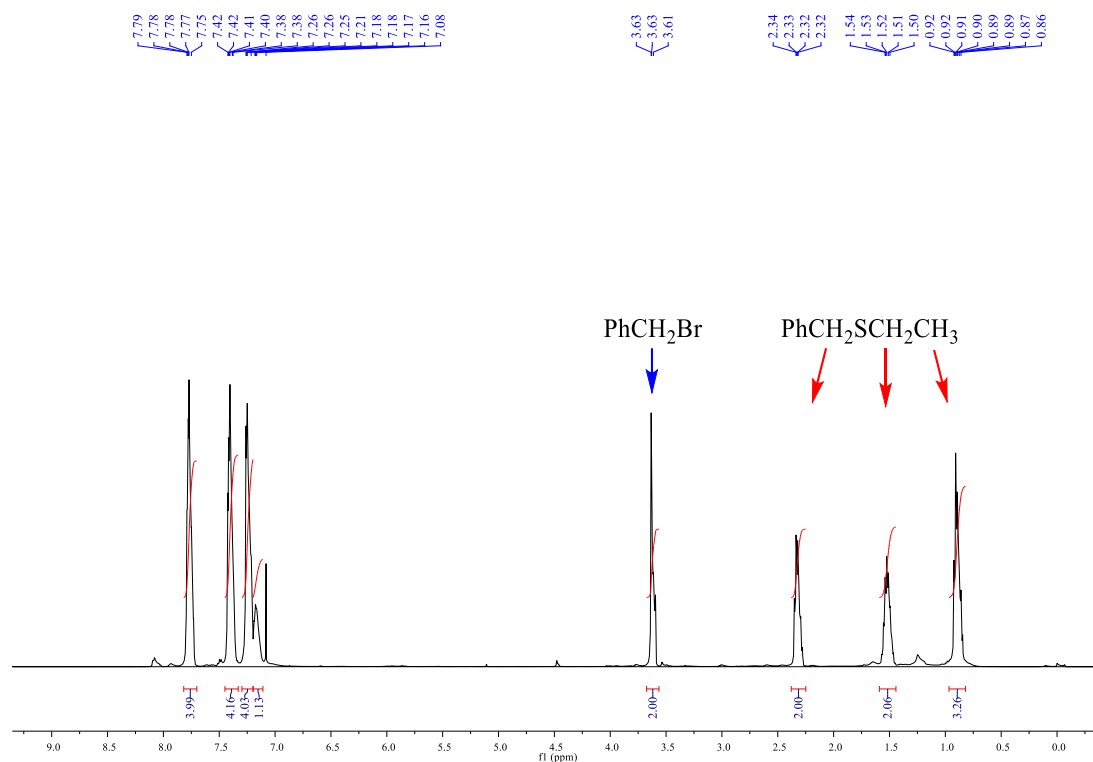

**Figure S1.** Cleavage of S-S bond of 1,2-diethyldisulfane and treatment with benzyl bromide.

## Part 5. The *P*-alkylation of *S<sub>P</sub>*-4b with alkyl halides and formaldehyde.

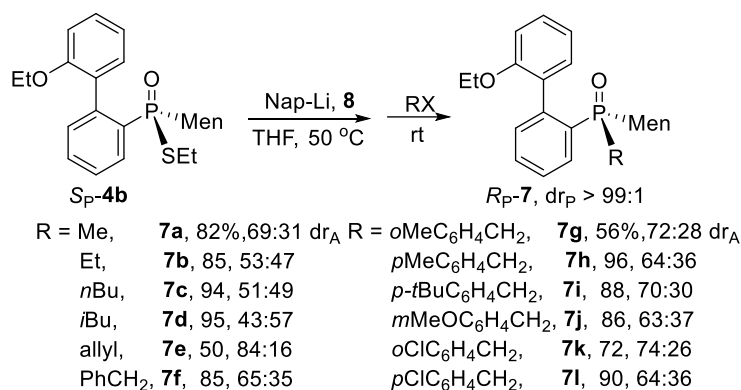

### Typical procedure:

The solution of **SP-4b** (50 mg, 0.112 mmol) in THF (1 mL) was warmed to 50 °C, then the lithium naphthalene **8** (naphthalene/Li = 1.5:1, 0.23 mL, 1 M, 0.23 mmol) was added dropwise. After stirred for 0.5 hours, the mixture was cooled to room temperature. 1-Bromobutane (36.3 μL, 0.336 mmol) was added and the mixture was stirred at room temperature for 5 hours. Saturated solution of ammonium chloride (5 mL) was added. The mixture was extracted with dichloromethane (3×5 mL), washed with water (3×5 mL), dried over magnesium sulfate. After removing solvents, the residue was purified with preparative TLC (silica gel, petroleum ether/ethyl acetate = 1/1 as eluent) to afford **RP-7c**.

### **RP-Butyl (2'-ethoxy-[1,1'-biphenyl]-2-yl) ((-)-menthyl) phosphine oxide (RP-7c)**

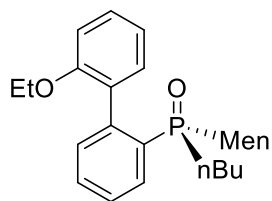

The crude **RP-7c** was obtained from *n*-butyl bromide, and the pure compound was obtained as white solid (41.7 mg, 84%, > 99:1  $\text{dr}_P$  and 51:49  $\text{dr}_A$ ) from preparative TLC (silica gel, petroleum ether/ethyl acetate = 1/1 as eluent); m.p. 117.5 – 122.6 °C; <sup>31</sup>P NMR (202 MHz, CDCl<sub>3</sub>) δ = 45.00 (s, 51%), 44.74 (s, 49%); <sup>1</sup>H NMR (500 MHz, CDCl<sub>3</sub>) δ = 8.13 – 8.09 (m, 0.49H), 8.01 – 7.94 (m, 0.51H), 7.48 – 7.41 (m, 2H), 7.39 (dd, *J*=6.6, 5.5, 1H), 7.36 – 7.33 (m, 0.51H), 7.22 – 7.16 (m, 1H), 7.02 (dd, *J*=7.5, 1.4, 0.49H), 6.95 (ddd, *J*=20.2, 15.9, 7.8, 2H), 4.07 – 3.98 (m, 1.02H), 3.93 (d, *J*=7.0, 0.98H), 2.40 (dd, *J*=8.7, 4.1, 1H), 2.35 – 2.17 (m, 1H), 2.05 – 1.99 (m, 1H), 1.86 (tt, *J*=9.0, 4.5, 1H), 1.70 – 1.55 (m, 5H), 1.35 – 1.29 (m, 2H), 1.26 (t, *J*=7.0, 2H), 1.18 (t, *J*=6.9, 2H), 0.88 (ddd, *J*=10.6, 9.2, 3.2, 6H), 0.83 (dd, *J*=6.8, 1.5, 4H), 0.75 (dd, *J*=7.8, 6.2, 4H), 0.30 (d, *J*=6.8, 1.53H), 0.21 (d, *J*=6.9, 1.47H); <sup>13</sup>C {<sup>1</sup>H} NMR (126 MHz, CDCl<sub>3</sub>) δ = 156.2 (d, *J*=62.7), 140.7 (dd, *J*=28.5, 9.2), 133.3 (d, *J*=6.6), 132.2 (t, *J*=4.8), 131.5 (d, *J*=10.3),



130.1 (d,  $J=2.2$ ), 130.1 – 129.9 (m), 129.7 (s), 129.4 (s), 126.9 (d,  $J=9.9$ ), 119.5 (s), 111.7 (d,  $J=37.6$ ), 63.7 (d,  $J=24.8$ ), 43.6 (dd,  $J=12.7, 3.7$ ), 41.5 (d,  $J=65.5$ ), 40.0 (d,  $J=65.5$ ), 36.3 – 35.4 (m), 34.3 (d,  $J=8.2$ ), 33.6 (dd,  $J=38.4, 13.7$ ), 29.1 (d,  $J=66.7$ ), 28.2 (dd,  $J=18.4, 1.7$ ), 24.9 (dd,  $J=12.3, 5.1$ ), 24.4 (dd,  $J=48.8, 14.8$ ), 23.7 (dd,  $J=15.7, 4.0$ ), 22.6 (d,  $J=3.9$ ), 21.7 (d,  $J=21.5$ ), 15.2 (d,  $J=6.4$ ), 14.7 (d,  $J=8.1$ ), 13.8 (d,  $J=1.1$ ). **HRMS (ESI<sup>+</sup>)** Calcd. for C<sub>28</sub>H<sub>40</sub>O<sub>2</sub>P [M+Na<sup>+</sup>]: 463.2742, Found: 463.2750.

**R<sub>P</sub>-(2'-ethoxy-[1,1'-biphenyl]-2-yl) (methyl) ((-)-menthyl) phosphine oxide (R<sub>P</sub>-7a)**

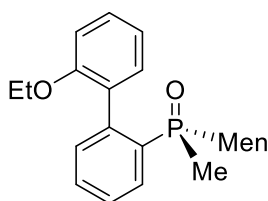

The crude **R<sub>P</sub>-7a** was obtained from methyl iodide, and the pure compound was obtained as white solid (51.5 mg, 73.6%, >99:1 dr<sub>P</sub> and 69:31 dr<sub>A</sub>) from preparative TLC (silica gel, petroleum ether/ethyl acetate = 1/1 as eluent), m.p. 149.3 – 150.6°C; <sup>31</sup>P NMR (202 MHz,

CDCl<sub>3</sub>) δ = 45.64 (s, 70%), 43.30 (s, 30%); <sup>1</sup>H NMR (500 MHz, CDCl<sub>3</sub>) δ = 7.97 – 7.89 (m, 0.3H), 7.83 (dd,  $J=12.1, 7.5, 0.7$ H), 7.44 (dd,  $J=7.5, 1.4, 0.7$ H), 7.36 (dq,  $J=15.0, 7.4, 2$ H), 7.30 – 7.23 (m, 1H), 7.20 – 7.16 (m, 0.7H), 7.15 – 7.11 (m, 0.3H), 6.98 (dd,  $J=7.3, 1.2, 0.3$ H), 6.93 (t,  $J=7.5, 1$ H), 6.90 – 6.82 (m, 1H), 4.01 – 3.81 (m, 2H), 2.43 – 2.37 (m, 0.7H), 2.32 (d,  $J=1.7, 0.3$ H), 1.88 (dd,  $J=15.3, 3.3, 0.3$ H), 1.65 – 1.49 (m, 3H), 1.40 (dd,  $J=11.7, 6.9, 3$ H), 1.29 (d,  $J=12.6, 1$ H), 1.16 (dt,  $J=21.3, 6.9, 4$ H), 0.83 (s, 1H), 0.77 (t,  $J=9.6, 4$ H), 0.73 – 0.68 (m, 2H), 0.67 (t,  $J=7.6, 3$ H), 0.60 – 0.49 (m, 0.7H), 0.35 (d,  $J=6.7, 2$ H), 0.24 (d,  $J=6.8, 1$ H); <sup>13</sup>C {<sup>1</sup>H} NMR (126 MHz, CDCl<sub>3</sub>) δ = 156.2 (d,  $J=7.7$ ), 140.9 (d,  $J=8.4$ ), 134.2 (d,  $J=90.1$ ), 132.7 (s), 132.3 – 132.1 (m), 131.7 (t,  $J=9.5$ ), 131.3 (d,  $J=8.3$ ), 130.2 – 130.0 (m), 129.5 (d,  $J=16.6$ ), 126.9 (dd,  $J=10.6, 4.1$ ), 119.6 (d,  $J=35.3$ ), 111.6 (d,  $J=72.7$ ), 63.6 (d,  $J=48.5$ ), 43.8 (dd,  $J=29.3, 3.2$ ), 40.5 (d,  $J=67.7$ ), 36.1 (d,  $J=13.8$ ), 34.4 (d,  $J=10.1$ ), 33.1 (d,  $J=14.5$ ), 28.1 (d,  $J=2.3$ ), 24.8 (d,  $J=12.6$ ), 22.5 (d,  $J=9.9$ ), 21.6 (d,  $J=9.9$ ), 15.2 (d,  $J=15.4$ ), 14.7 (d,  $J=10.4$ ), 12.6 (d,  $J=67.2$ ). **HRMS (ESI<sup>+</sup>)** Calcd. for C<sub>25</sub>H<sub>35</sub>O<sub>2</sub>P [M+Na<sup>+</sup>]: 421.2272, Found: 421.2281.

**R<sub>P</sub>-(2'-ethoxy-[1,1'-biphenyl]-2-yl) (ethyl) ((-)-menthyl) phosphine oxide (R<sub>P</sub>-7b)**

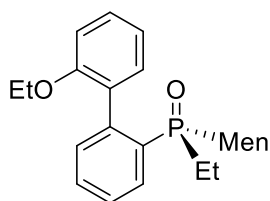

The crude **R<sub>P</sub>-7b** was obtained from bromoethane, and the pure compound was obtained as white solid (53.3 mg, 72.2%, >99:1 dr<sub>P</sub> and 53:47 dr<sub>A</sub>) from preparative TLC (silica gel, petroleum ether/ethyl acetate = 1/1 as eluent), m.p. 109.5 – 112.6 °C; <sup>31</sup>P NMR (202 MHz,

CDCl<sub>3</sub>) δ = 46.16 (s, 53%), 45.99 (s, 47%); <sup>1</sup>H NMR (500 MHz, CDCl<sub>3</sub>) δ = 8.08 – 7.99 (m,

0.47H), 7.93 (dd,  $J=10.4, 8.0, 0.53\text{H}$ ), 7.37 (t,  $J=7.0, 2\text{H}$ ), 7.32 – 7.28 (m, 1H), 7.27 (s, 0.53H), 7.16 – 7.08 (m, 1H), 6.97 (d,  $J=7.2, 0.47\text{H}$ ), 6.93 – 6.81 (m, 2H), 4.00 – 3.92 (m, 1H), 3.87 (dd,  $J=9.0, 7.2, 1\text{H}$ ), 2.34 (qd,  $J=13.3, 6.4, 1\text{H}$ ), 2.01 – 1.90 (m, 1H), 1.82 (td,  $J=12.6, 3.3, 1\text{H}$ ), 1.75 – 1.62 (m, 1H), 1.56 (ddd,  $J=9.3, 7.2, 3.6, 3\text{H}$ ), 1.47 – 1.34 (m, 1H), 1.18 (t,  $J=7.0, 2\text{H}$ ), 1.11 (t,  $J=7.0, 2\text{H}$ ), 1.04 – 0.91 (m, 4H), 0.85 (dd,  $J=12.3, 6.9, 2\text{H}$ ), 0.80 – 0.73 (m, 4H), 0.67 (d,  $J=6.3, 3\text{H}$ ), 0.24 (d,  $J=6.8, 2\text{H}$ ), 0.16 (d,  $J=6.9, 1\text{H}$ );  $^{13}\text{C}$  { $^1\text{H}$ } NMR (126 MHz,  $\text{CDCl}_3$ )  $\delta = 156.2$  (d,  $J=55.6$ ), 140.8 (dd,  $J=17.1, 9.1$ ), 133.3 (d,  $J=7.0$ ), 132.6 (d,  $J=7.2$ ), 132.2 – 131.9 (m), 131.6 (d,  $J=9.5$ ), 131.4 (s), 130.1 (dd,  $J=7.4, 2.3$ ), 129.7 (s), 129.4 (s), 126.8 (dd,  $J=10.0, 5.2$ ), 119.5 (d,  $J=4.1$ ), 111.6 (d,  $J=58.0$ ), 63.6 (d,  $J=48.8$ ), 43.6 (dd,  $J=18.8, 3.9$ ), 41.2 (d,  $J=65.5$ ), 40.1 (d,  $J=65.8$ ), 36.1 – 35.4 (m), 34.3 (d,  $J=3.5$ ), 33.5 (dd,  $J=37.9, 13.7$ ), 28.2 (dd,  $J=13.8, 1.7$ ), 24.9 (dd,  $J=12.3, 6.3$ ), 22.5 (d,  $J=3.3$ ), 21.6 (d,  $J=17.8$ ), 19.4 (d,  $J=67.1$ ), 15.2 (d,  $J=9.2$ ), 14.6 (d,  $J=12.3$ ), 5.9 (dd,  $J=30.1, 5.2$ ). HRMS (ESI+) Calcd. for  $\text{C}_{26}\text{H}_{38}\text{O}_2\text{P}$  [ $\text{M}+\text{H}^+$ ]: 413.2609, Found: 413.2668.

***R<sub>P</sub>*-(2'-Ethoxy-[1,1'-biphenyl]-2-yl)(isobutyl)((-)-menthyl) phosphine oxide (*R<sub>P</sub>*-7d)**

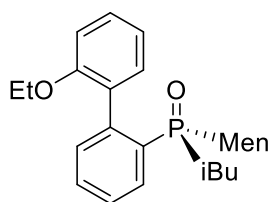

The crude *R<sub>P</sub>*-7d was obtained from isobutane, and the pure compound was obtained as white solid (63.2 mg, 80%, >99:1 dr<sub>P</sub> and 43:57 dr<sub>A</sub>) from preparative TLC (silica gel, petroleum ether/ethyl acetate = 1/1 as eluent), m.p. 118.6 – 123.1 °C;  $^{31}\text{P}$  NMR (202 MHz,  $\text{CDCl}_3$ )  $\delta = 44.89$

(s, 43%), 43.68 (s, 57%);  $^1\text{H}$  NMR (500 MHz,  $\text{CDCl}_3$ )  $\delta = 8.24$  – 8.03 (m, 0.57H), 7.99 – 7.84 (m, 0.43H), 7.51 – 7.39 (m, 2H), 7.39 – 7.30 (m, 1H), 7.26 – 7.18 (m, 1H), 7.05 (d,  $J=7.2, 1\text{H}$ ), 7.00 – 6.87 (m, 2H), 4.10 – 3.99 (m, 1.14H), 3.95 (d,  $J=6.7, 0.86\text{H}$ ), 2.53 – 2.38 (m, 1H), 2.10 (dt,  $J=14.3, 7.0, 0.43\text{H}$ ), 2.05 – 1.92 (m, 0.57H), 1.87 (d,  $J=3.2, 0.43\text{H}$ ), 1.76 (s, 0.57H), 1.57 (tdd,  $J=19.2, 14.8, 9.8, 5\text{H}$ ), 1.33 – 1.15 (m, 4H), 1.08 (dd,  $J=16.8, 6.5, 3\text{H}$ ), 0.97 (d,  $J=6.5, 1\text{H}$ ), 0.91 (dd,  $J=20.4, 9.8, 4\text{H}$ ), 0.83 (t,  $J=8.6, 4\text{H}$ ), 0.78 – 0.70 (m, 4H), 0.32 (d,  $J=6.7, 1.3\text{H}$ ), 0.23 (d,  $J=6.9, 1.7\text{H}$ );  $^{13}\text{C}$  { $^1\text{H}$ } NMR (126 MHz,  $\text{CDCl}_3$ )  $\delta = 156.1$  (d,  $J=31.2$ ), 140.9 (dd,  $J=70.3, 8.9$ ), 133.2 (d,  $J=6.7$ ), 132.6 (d,  $J=10.0$ ), 131.8 (dt,  $J=9.5, 7.2$ ), 130.0 (d,  $J=1.9$ ), 129.8 – 129.7 (m), 129.7 (s), 129.3 (s), 127.7 – 125.9 (m), 119.9 – 118.9 (m), 111.5 (t,  $J=24.7$ ), 63.7 (d,  $J=20.6$ ), 43.7 (dd,  $J=14.8, 3.4$ ), 40.9 (dd,  $J=157.8, 65.5$ ), 37.2 (d,  $J=65.5$ ), 36.3 – 35.5 (m), 34.4 (d,  $J=23.7$ ), 33.7 (d,  $J=13.6$ ), 33.5 – 33.2 (m), 28.1 (dd,  $J=29.9, 1.8$ ), 25.5 (dd,  $J=12.7, 6.8$ ), 24.9 (d,  $J=12.5$ ), 24.2 (dd,  $J=27.6, 4.5$ ), 23.8 (dd,  $J=5.1, 3.8$ ), 22.6 (d,  $J=7.6$ ), 21.6 (d,  $J=24.6$ ), 15.2 (d,  $J=9.5$ ), 14.7 (s). HRMS (ESI+) Calcd. for  $\text{C}_{28}\text{H}_{40}\text{O}_2\text{P}$  [ $\text{M}+\text{Na}^+$ ]: 463.2742, Found: 463.2744.

***R*<sub>P</sub>-Allyl (2'-ethoxy-[1,1'-biphenyl]-2-yl) ((-)-menthyl) phosphine oxide (*R*<sub>P</sub>-7e)**

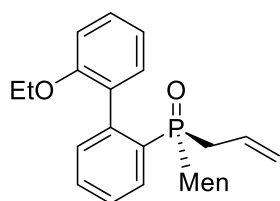

The crude *R*<sub>P</sub>-7e was obtained from allyl chloride, and the pure compound was obtained as white solid (79.5 mg, 81%, >99:1 dr<sub>P</sub> and 84:16 dr<sub>A</sub>) from preparative TLC (silica gel, petroleum ether/ethyl acetate = 1/1 as eluent), m.p.132.8 – 134.8 °C; <sup>31</sup>P NMR (202 MHz, CDCl<sub>3</sub>) δ = 38.66 (s, 84%), 33.50 (s, 16%); <sup>1</sup>H NMR (500 MHz, CDCl<sub>3</sub>) δ = 7.96 – 7.91 (m, 0.16H), 7.77 (dd, *J*=7.5, 1.6, 0.84H), 7.73 – 7.65 (m, 1H), 7.43 (t, *J*=7.5, 1H), 7.35 (ddd, *J*=9.3, 4.0, 1.6, 3H), 7.04 (dd, *J*=12.7, 5.5, 1H), 6.92 (d, *J*=8.4, 1H), 5.96 – 5.83 (m, 1H), 4.07 – 3.89 (m, 2H), 2.54 – 2.43 (m, 1H), 2.02 (d, *J*=6.5, 2H), 1.79 (d, *J*=6.3, 1H), 1.57 – 1.51 (m, 2H), 1.17 – 1.07 (m, 2H), 0.91 – 0.79 (m, 5H), 0.73 (d, *J*=7.0, 4H), 0.69 (d, *J*=6.4, 4H), 0.47 (t, *J*=14.4, 3H); <sup>13</sup>C {<sup>1</sup>H} NMR (126 MHz, CDCl<sub>3</sub>) δ = 155.9 (s), 148.1 (s), 141.4 (d, *J*=8.0), 133.9 (s), 132.5 (d, *J*=34.2), 132.3 (s), 129.7 (d, *J*=1.8), 129.3 (s), 126.7 (d, *J*=18.8), 121.5 – 120.2 (m), 119.9 (s), 110.9 (s), 63.3 (s), 44.2 (s), 39.5 (d, *J*=68.0), 36.0 (s), 34.6 (s), 33.1 (d, *J*=14.7), 29.7 (s), 27.7 (s), 24.7 (d, *J*=22.6), 22.5 (s), 21.5 (s), 20.6 (s), 20.5 (s), 15.2 (s), 14.7 (s). HRMS (ESI<sup>+</sup>) Calcd. for C<sub>27</sub>H<sub>37</sub>O<sub>2</sub>P [M+Na<sup>+</sup>]: 447.2429, Found: 447.2438.

***R*<sub>P</sub>-Benzyl (2'-ethoxy-[1,1'-biphenyl]-2-yl) ((-)-menthyl) phosphine oxide (*R*<sub>P</sub>-7f)**

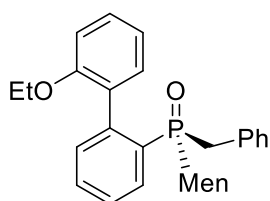

The crude *R*<sub>P</sub>-7f was obtained from benzyl chloride, and the pure compound was obtained as white solid (61.3 mg, 72%, >99:1 dr<sub>P</sub> and 65:35 dr<sub>A</sub>) from preparative TLC (silica gel, petroleum ether/ethyl acetate = 2/1 as eluent), m.p. 67.3 – 71.4 °C; <sup>31</sup>P NMR (202 MHz, CDCl<sub>3</sub>) δ = 41.74 (s, 65%), 40.86 (s, 35%); <sup>1</sup>H NMR (500 MHz, CDCl<sub>3</sub>) δ = 7.81 (ddd, *J*=11.3, 5.5, 2.2, 0.35H), 7.77 – 7.68 (m, 0.65H), 7.48 – 7.37 (m, 2H), 7.38 – 7.28 (m, 4H), 7.17 (ddd, *J*=19.2, 13.7, 7.0, 4H), 7.05 – 6.89 (m, 2H), 4.08 – 4.00 (m, 0.7H), 3.97 (dd, *J*=13.9, 7.0, 1.3H), 3.43 – 3.12 (m, 2H), 2.44 – 2.34 (m, 0.35H), 2.32 – 2.22 (m, 0.65H), 2.13 – 2.03 (m, 0.35H), 1.86 – 1.79 (m, 0.65H), 1.77 (d, *J*=2.4, 1H), 1.63 – 1.50 (m, 2H), 1.35 – 1.15 (m, 5H), 0.83 – 0.63 (m, 7H), 0.53 (d, *J*=6.9, 2H), 0.27 (dd, *J*=9.1, 7.0, 3H); <sup>13</sup>C {<sup>1</sup>H} NMR (126 MHz, CDCl<sub>3</sub>) δ = 156.1 (d, *J*=45.6), 141.9 (d, *J*=7.5), 133.5 (s), 133.2 (d, *J*=7.3), 132.9 (d, *J*=9.2), 131.4 (d, *J*=8.2), 130.7 (d, *J*=5.2), 130.3 (dd, *J*=20.7, 4.0), 129.9 (d, *J*=2.0), 129.3 (s), 128.1 (dd, *J*=6.4, 1.2), 126.6 (s), 126.5 (d, *J*=3.6), 126.4 (s), 126.4 (d, *J*=2.3), 126.3 (d, *J*=1.8),

119.6 (d,  $J=27.6$ ), 111.7 (d,  $J=98.9$ ), 63.8 (d,  $J=30.4$ ), 43.7 (dd,  $J=9.2$ , 3.6), 41.6 (s), 40.8 (d,  $J=54.0$ ), 36.6 – 36.1 (m), 34.4 (d,  $J=33.6$ ), 33.9 – 33.5 (m), 33.4 – 33.1 (m), 27.9 (d,  $J=1.4$ ), 25.1 (d,  $J=12.5$ ), 22.5 (d,  $J=13.5$ ), 21.4 (d,  $J=44.3$ ), 15.2 (d,  $J=4.8$ ), 14.7 (s). **HRMS (ESI<sup>+</sup>)** Calcd. for C<sub>31</sub>H<sub>39</sub>O<sub>2</sub>P [M+Na<sup>+</sup>]: 497.2585, Found: 497.2592.

**R<sub>P</sub>-(2'-Ethoxy-[1,1'-biphenyl]-2-yl) ((-)-menthyl)(2-methylbenzyl)phosphine oxide (R<sub>P</sub>-7g)**

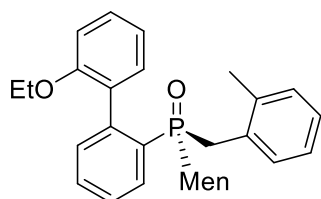

The crude **R<sub>P</sub>-7g** was obtained from 2-methylbenzyl bromide, and the pure compound was obtained as white solid (41.3 mg, 47%, >99:1 dr<sub>P</sub> and 72:28 dr<sub>A</sub>) from preparative TLC (silica gel, petroleum ether/ethyl acetate = 2/1 as eluent), m.p. 50.0 – 53.6 °C;

**<sup>31</sup>P NMR (202 MHz, CDCl<sub>3</sub>)** δ = 42.49 (s, 72%), 41.21 (s, 28%); **<sup>1</sup>H NMR (500 MHz, CDCl<sub>3</sub>)** δ = 7.88 – 7.81 (m, 0.28H), 7.78 – 7.69 (m, 0.72H), 7.43 (t,  $J=7.5$ , 1H), 7.37 (t,  $J=7.2$ , 1H), 7.33 – 7.26 (m, 1H), 7.23 (dd,  $J=6.8$ , 3.0, 1H), 7.12 (dd,  $J=11.8$ , 4.4, 1H), 7.08 (d,  $J=7.3$ , 1H), 7.06 (s, 0.56H), 6.99 – 6.92 (m, 2H), 6.88 (t,  $J=7.6$ , 1.42H), 4.03 (qd,  $J=6.9$ , 1.8, 0.56H), 3.95 (q,  $J=7.0$ , 1.42H), 3.38 (dd,  $J=14.5$ , 12.9, 0.56H), 3.33 – 3.01 (m, 1.42H), 2.34 (s, 2H), 2.24 – 2.20 (m, 1H), 1.89 (dt,  $J=13.3$ , 6.7, 1H), 1.67 – 1.53 (m, 2H), 1.21 (dt,  $J=22.7$ , 7.0, 4H), 0.98 – 0.90 (m, 1H), 0.81 (t,  $J=6.3$ , 3H), 0.76 – 0.73 (m, 2H), 0.56 (d,  $J=6.9$ , 2H), 0.27 (t,  $J=7.9$ , 3H); **<sup>13</sup>C {<sup>1</sup>H} NMR (126 MHz, CDCl<sub>3</sub>)** δ = 156.1 (d,  $J=68.0$ ), 141.1 (d,  $J=151.2$ ), 137.1 (s), 133.9 (d,  $J=85.5$ ), 132.9 (d,  $J=5.0$ ), 132.8 (s), 131.9 (dd,  $J=12.7$ , 7.5), 131.5 (s), 131.4 (d,  $J=8.8$ ), 131.0 (d,  $J=4.2$ ), 130.2 (t,  $J=4.4$ ), 129.8 (d,  $J=2.0$ ), 129.6 – 129.4 (m), 129.1 (s), 126.3 (d,  $J=26.1$ ), 125.5 (s), 119.5 (s), 111.7 (d,  $J=116.4$ ), 63.7 (d,  $J=35.8$ ), 43.6 (dd,  $J=37.9$ , 3.4), 41.7 (d,  $J=65.1$ ), 36.5 – 35.4 (m), 34.3 (d,  $J=18.8$ ), 33.6 – 33.0 (m), 30.8 (d,  $J=60.7$ ), 27.9 (dd,  $J=26.7$ , 1.5), 24.9 – 24.3 (m), 22.5 (d,  $J=18.1$ ), 21.4 (d,  $J=43.3$ ), 20.6 (d,  $J=3.9$ ), 15.2 (d,  $J=9.0$ ), 14.7 (s). **HRMS (ESI<sup>+</sup>)** Calcd. for C<sub>32</sub>H<sub>41</sub>O<sub>2</sub>P [M+K<sup>+</sup>]: 527.2481, Found: 497.2511.

**R<sub>P</sub>-(2'-Ethoxy-[1,1'-biphenyl]-2-yl) ((-)-menthyl)(4-methylbenzyl) phosphine oxide (R<sub>P</sub>-7h)**

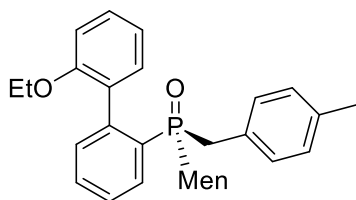

The crude **R<sub>P</sub>-7h** was obtained from 4-methylbenzyl chloride, and the pure compound was obtained as white solid (71.9 mg, 82%, >99:1 dr<sub>P</sub> and 64:36 dr<sub>A</sub>) from preparative TLC (silica gel, petroleum ether/ethyl acetate = 2/1 as eluent), m.p. 150.3 –

153.8 °C; **<sup>31</sup>P NMR (202 MHz, CDCl<sub>3</sub>)** δ = 41.81 (s, 64%), 40.96 (s, 36%); **<sup>1</sup>H NMR (500 MHz, CDCl<sub>3</sub>)** δ = 7.82 (ddd,  $J=11.4$ , 7.8, 0.8, 0.36H), 7.73 (ddd,  $J=11.3$ , 7.7, 0.8, 0.64H), 7.41 (ddd,

$J=8.9, 7.5, 0.9, 1\text{H}$ ),  $7.36 - 7.28$  (m, 2H),  $7.25 - 7.23$  (m, 0.36H),  $7.22 - 7.18$  (m, 2H),  $7.13$  (dd,  $J=12.8, 3.7, 0.64\text{H}$ ),  $7.10 - 7.06$  (m, 0.36H),  $7.05 - 7.00$  (m, 2H),  $7.00 - 6.93$  (m, 2H),  $6.92 - 6.89$  (m, 0.64H),  $4.03$  (dd,  $J=7.0, 4.9, 0.72\text{H}$ ),  $3.97$  (q,  $J=7.0, 1.28\text{H}$ ),  $3.24$  (ddt,  $J=40.6, 14.9, 9.6, 2\text{H}$ ),  $2.42 - 2.35$  (m, 0.36H),  $2.27$  (d,  $J=13.2, 3\text{H}$ ),  $2.08$  (dd,  $J=8.2, 3.6, 0.64\text{H}$ ),  $1.79$  (dd,  $J=11.8, 2.6, 1\text{H}$ ),  $1.56$  (dd,  $J=22.6, 19.8, 2\text{H}$ ),  $1.37 - 1.30$  (m, 1H),  $1.21$  (dt,  $J=17.0, 7.0, 3\text{H}$ ),  $0.94$  (d,  $J=6.8, 2\text{H}$ ),  $0.83 - 0.67$  (m, 7H),  $0.54$  (d,  $J=6.9, 2\text{H}$ ),  $0.27$  (dd,  $J=6.7, 4.9, 3\text{H}$ );  $^{13}\text{C}$  { $^1\text{H}$ } NMR (126 MHz,  $\text{CDCl}_3$ )  $\delta = 156.1$  (d,  $J=42.5$ ),  $141.4$  (dd,  $J=132.0, 8.2$ ),  $135.8$  (dd,  $J=17.1, 2.2$ ),  $134.0$  (d,  $J=9.8$ ),  $133.4$  (d,  $J=13.3$ ),  $133.0$  (d,  $J=7.3$ ),  $132.9$  (d,  $J=9.6$ ),  $131.9 - 131.7$  (m),  $131.4$  (d,  $J=8.4$ ),  $130.5$  (d,  $J=5.1$ ),  $130.2$  (d,  $J=5.8$ ),  $129.9$  (t,  $J=6.7$ ),  $129.7 - 129.5$  (m),  $129.2$  (s),  $128.8$  (d,  $J=1.5$ ),  $126.5$  (dd,  $J=15.6, 10.3$ ),  $119.6$  (d,  $J=22.9$ ),  $111.7$  (d,  $J=103.0$ ),  $63.8$  (d,  $J=36.5$ ),  $43.6$  (dt,  $J=10.4, 5.4$ ),  $41.8 - 40.9$  (m),  $36.7 - 35.8$  (m),  $34.4$  (d,  $J=33.9$ ),  $33.6$  (d,  $J=13.6$ ),  $33.4 - 33.2$  (m),  $32.8$  (s),  $28.6 - 27.3$  (m),  $25.5 - 24.5$  (m),  $22.5$  (d,  $J=12.2$ ),  $21.1$  (d,  $J=21.1$ ),  $15.2$  (d,  $J=4.9$ ),  $14.7$  (s). HRMS (ESI<sup>+</sup>) Calcd. for  $\text{C}_{31}\text{H}_{39}\text{O}_2\text{P}$  [ $\text{M}+\text{Na}^+$ ]: 511.2742, Found: 511.2744.

***R*<sub>P</sub>-(4-(tert-Butyl)benzyl)(2'-ethoxy-[1,1'-biphenyl]-2-yl)((-)-menthyl) phosphine oxide (*R*<sub>P</sub>-7i)**

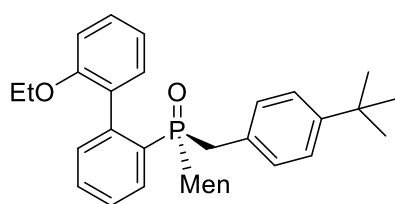

The crude *R*<sub>P</sub>-7i was obtained from 4-tert-buthylbenzyl bromide, and the pure compound was obtained as white solid (71.5 mg, 75%, >99:1 dr<sub>P</sub> and 70:30 dr<sub>A</sub>) from preparative TLC (silica gel, petroleum ether/ethyl acetate =

2/1 as eluent), m.p.  $71.4 - 75.6$  °C;  $^{31}\text{P}$  NMR (202 MHz,  $\text{CDCl}_3$ )  $\delta = 41.89$  (s, 70%),  $40.93$  (s, 30%);  $^1\text{H}$  NMR (500 MHz,  $\text{CDCl}_3$ )  $\delta = 7.83 - 7.78$  (m, 0.3H),  $7.76 - 7.68$  (m, 0.7H),  $7.43$  (t,  $J=7.2, 1\text{H}$ ),  $7.38 - 7.33$  (m, 1H),  $7.30$  (d,  $J=7.3, 1\text{H}$ ),  $7.19$  (d,  $J=8.1, 1.4\text{H}$ ),  $7.15$  (d,  $J=7.8, 0.6\text{H}$ ),  $6.96$  (dt,  $J=15.0, 7.1, 1.4\text{H}$ ),  $6.89$  (d,  $J=8.2, 0.6\text{H}$ ),  $4.04$  (s, 0.6H),  $3.96$  (q,  $J=6.8, 1.4\text{H}$ ),  $3.35$  (dt,  $J=25.7, 14.1, 1.4\text{H}$ ),  $3.18$  (t,  $J=12.0, 0.6\text{H}$ ),  $2.43 - 2.35$  (m, 0.3H),  $2.29 - 2.18$  (m, 0.7H),  $2.07$  (ddd,  $J=14.2, 8.5, 5.7, 0.3\text{H}$ ),  $1.95$  (s, 0.7H),  $1.75$  (d,  $J=12.2, 1\text{H}$ ),  $1.68 - 1.53$  (m, 2H),  $1.49$  (s, 1H),  $1.27$  (t,  $J=9.9, 9\text{H}$ ),  $1.20$  (t,  $J=6.7, 2\text{H}$ ),  $1.08 - 0.87$  (m, 2H),  $0.84 - 0.66$  (m, 7H),  $0.46$  (d,  $J=6.7, 2\text{H}$ ),  $0.25$  (dd,  $J=21.8, 6.7, 3\text{H}$ );  $^{13}\text{C}$  { $^1\text{H}$ } NMR (126 MHz,  $\text{CDCl}_3$ )  $\delta = 156.1$  (d,  $J=48.0$ ),  $149.1$  (dd,  $J=23.6, 2.2$ ),  $142.9 - 141.0$  (m),  $133.6$  (s),  $133.0$  (d,  $J=9.8$ ),  $131.8$  (s),  $131.1$  (d,  $J=8.4$ ),  $130.4$  (d,  $J=5.2$ ),  $130.1$  (s),  $129.9$  (d,  $J=4.9$ ),  $129.9 - 129.8$  (m),  $129.6$  (s),  $129.5$  (s),  $129.2$  (s),  $126.5$  (dd,  $J=15.0, 10.3$ ),  $125.0$  (d,  $J=6.9$ ),  $119.6$  (d,  $J=24.3$ ),  $111.6$  (d,  $J=118.0$ ),  $63.7$  (d,  $J=38.6$ ),

43.7 (d,  $J=3.4$ ), 41.6 (s), 41.1 (s), 36.5 (s), 36.4 – 35.9 (m), 34.5 (d,  $J=27.8$ ), 33.4 – 32.9 (m), 31.3 (d,  $J=3.4$ ), 27.8 (d,  $J=1.3$ ), 25.1 (d,  $J=12.5$ ), 22.5 (d,  $J=12.5$ ), 21.3 (d,  $J=44.4$ ), 15.1 (s), 14.7 (s).

**HRMS (ESI<sup>+</sup>)** Calcd. for C<sub>35</sub>H<sub>47</sub>O<sub>2</sub>P [M+Na<sup>+</sup>]: 553.3211, Found: 553.3220.

**R<sub>P</sub>-(2'-Ethoxy-[1,1'-biphenyl]-2-yl)((-)-menthyl)(3-methoxybenzyl) phosphine oxide (R<sub>P</sub>-7j)**

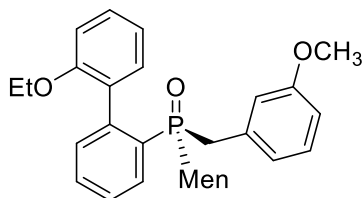

The crude **R<sub>P</sub>-7j** was obtained from 3-methoxybenzyl chloride, and the pure compound was obtained as white solid (66.1 mg, 73%, >99:1 dr<sub>P</sub> and 63:37 dr<sub>A</sub>) from preparative TLC (silica gel, petroleum ether/ethyl acetate =2/1 as eluent), m.p. 53.5 –

58.6 °C; <sup>31</sup>P NMR (202 MHz, CDCl<sub>3</sub>) δ = 41.87 (s, 63%), 41.10 (s, 37%); <sup>1</sup>H NMR (500 MHz, CDCl<sub>3</sub>) δ = 7.84 (dd,  $J=11.2$ , 7.7, 1H), 7.73 (dd,  $J=11.1$ , 8.0, 1H), 7.41 (dd,  $J=14.6$ , 7.3, 1H), 7.38 – 7.29 (m, 2H), 7.24 (dd,  $J=6.9$ , 3.2, 1H), 7.21 – 7.18 (m, 1H), 7.15 – 7.06 (m, 1H), 7.04 – 6.90 (m, 2H), 6.87 (t,  $J=6.2$ , 2H), 6.81 (d,  $J=7.5$ , 1H), 6.74 (s, 1H), 4.04 (dd,  $J=6.8$ , 5.8, 1H), 3.97 (q,  $J=7.0$ , 1H), 3.69 (d,  $J=8.9$ , 3H), 3.39 – 3.06 (m, 2H), 2.41 – 2.38 (m, 1H), 2.34 – 2.28 (m, 1H), 2.13 – 2.07 (m, 1H), 1.83 (dd,  $J=12.1$ , 2.5, 1H), 1.62 – 1.50 (m, 2H), 1.38 – 1.32 (m, 1H), 1.24 (t,  $J=7.0$ , 1H), 1.20 (t,  $J=7.0$ , 2H), 1.02 – 0.95 (m, 1H), 0.86 – 0.69 (m, 8H), 0.58 (d,  $J=6.9$ , 2H), 0.27 (d,  $J=6.7$ , 3H); <sup>13</sup>C {<sup>1</sup>H} NMR (126 MHz, CDCl<sub>3</sub>) δ = 159.3 (dd,  $J=10.1$ , 1.4), 156.0 (d,  $J=42.2$ ), 141.9 (d,  $J=7.6$ ), 134.6 (dd,  $J=7.1$ , 3.5), 133.9 (s), 133.3 (d,  $J=11.0$ ), 132.9 (d,  $J=9.6$ ), 132.0 – 131.6 (m), 131.5 (d,  $J=8.3$ ), 130.2 (d,  $J=2.0$ ), 129.9 (d,  $J=2.3$ ), 129.7 (s), 129.3 (s), 129.1 – 128.9 (m), 126.5 (dd,  $J=14.9$ , 10.4), 122.9 (dd,  $J=51.7$ , 5.7), 119.6 (d,  $J=16.9$ ), 115.4 (dd,  $J=59.7$ , 5.3), 113.0 – 111.8 (m), 111.3 (s), 63.7 (d,  $J=32.4$ ), 55.1 (d,  $J=10.5$ ), 43.6 (dd,  $J=13.1$ , 3.6), 41.7 – 40.8 (m), 36.6 – 35.7 (m), 34.5 (s), 34.2 (d,  $J=7.9$ ), 33.6 (d,  $J=12.0$ ), 33.3 (d,  $J=14.0$ ), 28.0 (dd,  $J=38.6$ , 1.5), 24.9 (dd,  $J=12.5$ , 8.2), 22.5 (d,  $J=12.5$ ), 21.4 (d,  $J=46.3$ ), 15.2 (s), 14.7 (s). **HRMS (ESI<sup>+</sup>)** Calcd. for C<sub>32</sub>H<sub>41</sub>O<sub>3</sub>P [M+Na<sup>+</sup>]: 527.2691, Found: 527.2700.

**R<sub>P</sub>-(2-Chlorobenzyl)(2'-ethoxy-[1,1'-biphenyl]-2-yl)((-)-menthyl)phosphine oxide (R<sub>P</sub>-7k)**

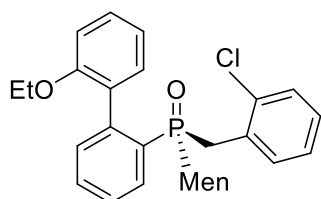

The crude **R<sub>P</sub>-7k** was obtained from 2-chlorobenzyl chloride, and the pure compound was obtained as white solid (56.6 mg, 62%, >99:1 dr<sub>P</sub> and 74:26 dr<sub>A</sub>) from preparative TLC (silica gel, petroleum ether/ethyl acetate =2/1 as eluent), m.p. 58.2 – 61.8 °C;

<sup>31</sup>P NMR (202 MHz, CDCl<sub>3</sub>) δ = 43.88 (s, 74%), 42.12 (s, 26%); <sup>1</sup>H NMR (500 MHz, CDCl<sub>3</sub>) δ = 7.91 – 7.74 (m, 2H), 7.45 (t,  $J=7.1$ , 2H), 7.38 (dd,  $J=13.4$ , 6.4, 1H), 7.32 (t,  $J=7.8$ , 2H), 7.23 (d,

$J=4.0$ , 1H), 7.17 – 7.08 (m, 2H), 6.98 (dd,  $J=16.8$ , 8.7, 1H), 6.92 (d,  $J=8.3$ , 1H), 4.07 – 4.01 (m, 0.52H), 3.96 (q,  $J=6.8$ , 1.48H), 3.70 (dd,  $J=14.8$ , 10.4, 0.74H), 3.57 – 3.50 (m, 0.26H), 3.44 (t,  $J=15.2$ , 0.74H), 3.30 (d,  $J=14.1$ , 0.26H), 2.40 – 2.30 (m, 0.26H), 2.29 – 2.17 (m, 0.74H), 2.05 (d,  $J=10.8$ , 0.26H), 1.76 (q,  $J=12.5$ , 0.74H), 1.67 – 1.44 (m, 3H), 1.38 – 1.15 (m, 5H), 1.07 – 0.93 (m, 1H), 0.90 – 0.82 (m, 1H), 0.72 (dd,  $J=15.5$ , 7.7, 5H), 0.44 (d,  $J=6.8$ , 2H), 0.26 (dd,  $J=21.4$ , 6.7, 3H);  $^{13}\text{C}$  { $^1\text{H}$ } NMR (126 MHz,  $\text{CDCl}_3$ )  $\delta$  = 156.2 (d,  $J=38.5$ ), 141.7 (dd,  $J=47.2$ , 8.1), 134.1 – 133.9 (m), 133.3 (s), 132.9 (d,  $J=9.8$ ), 132.8 (d,  $J=3.5$ ), 132.1 (dd,  $J=8.5$ , 4.6), 131.9 (t,  $J=5.5$ ), 131.2 (s), 130.9 (d,  $J=8.2$ ), 130.4 – 130.0 (m), 130.1 (d,  $J=2.0$ ), 129.5 (d,  $J=3.8$ ), 129.3 (d,  $J=4.0$ ), 127.9 – 127.6 (m), 126.7 (t,  $J=7.8$ ), 119.8 (d,  $J=9.0$ ), 111.6 (d,  $J=88.4$ ), 63.7 (d,  $J=33.3$ ), 43.5 (dd,  $J=45.5$ , 3.4), 41.5 (dd,  $J=65.3$ , 37.0), 36.4 – 35.1 (m), 34.6 – 33.4 (m), 33.8 – 32.7 (m), 29.1 (d,  $J=60.3$ ), 28.0 (dd,  $J=28.5$ , 1.3), 24.9 (t,  $J=11.9$ ), 22.4 (d,  $J=15.7$ ), 21.3 (d,  $J=42.9$ ), 15.1 (d,  $J=14.6$ ), 14.7 (s). HRMS (ESI<sup>+</sup>) Calcd. for  $\text{C}_{31}\text{H}_{38}\text{ClO}_2\text{P}$  [ $\text{M}+\text{Na}^+$ ]: 531.2196, Found: 531.2203.

***R*<sub>P</sub>-(4-Chlorobenzyl) (2'-ethoxy-[1,1'-biphenyl]-2-yl) ((-)-menthyl) phosphine oxide (*R*<sub>P</sub>-7I)**

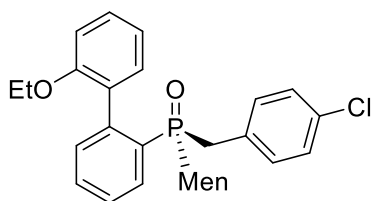

The crude *R*<sub>P</sub>-7I was obtained from 4-chlorobenzyl chloride, and the pure compound was obtained as white solid (69.4 mg, 76%, >99:1 dr<sub>P</sub> and 64:36 dr<sub>A</sub>) from preparative TLC (silica gel, petroleum ether/ethyl acetate = 2/1 as eluent), m.p. 80.9 –

84.6 °C;  $^{31}\text{P}$  NMR (202 MHz,  $\text{CDCl}_3$ )  $\delta$  = 41.51 (s, 64%), 40.84 (s, 36%);  $^1\text{H}$  NMR (500 MHz,  $\text{CDCl}_3$ )  $\delta$  = 7.81 (dd,  $J=11.1$ , 8.2, 0.36H), 7.70 (dd,  $J=11.0$ , 8.1, 0.64H), 7.42 (dd,  $J=17.6$ , 8.3, 2H), 7.37 – 7.27 (m, 3H), 7.21 (t,  $J=6.2$ , 2H), 7.16 (dd,  $J=11.6$ , 8.2, 2H), 7.09 (d,  $J=4.3$ , 0.36H), 6.99 (dt,  $J=14.1$ , 7.2, 1H), 6.93 (d,  $J=8.3$ , 0.64H), 4.10 – 3.87 (m, 2H), 3.25 (tt,  $J=17.3$ , 8.8, 1.28H), 3.10 (dd,  $J=14.8$ , 10.2, 0.64H), 2.42 – 2.36 (m, 0.36H), 2.34 – 2.21 (m, 1H), 2.19 – 2.01 (m, 0.64H), 1.87 (d,  $J=11.1$ , 1H), 1.59 (dd,  $J=25.3$ , 13.4, 2H), 1.36 (s, 1H), 1.21 (dt,  $J=14.1$ , 6.9, 3H), 1.04 – 0.91 (m, 2H), 0.78 (dt,  $J=15.3$ , 7.0, 6H), 0.60 (d,  $J=6.8$ , 2H), 0.28 (t,  $J=5.9$ , 3H);  $^{13}\text{C}$  { $^1\text{H}$ } NMR (126 MHz,  $\text{CDCl}_3$ )  $\delta$  = 156.1 (d,  $J=44.4$ ), 141.3 (dd,  $J=110.6$ , 8.6), 133.2 (s), 132.9 (d,  $J=5.7$ ), 132.8 (s), 132.3 (dd,  $J=13.3$ , 2.5), 131.9 (d,  $J=4.8$ ), 131.6 (d,  $J=3.2$ ), 131.6 (s), 130.2 (d,  $J=2.2$ ), 129.8 (s), 129.5 – 129.3 (m), 128.5 – 127.4 (m), 126.8 (s), 126.7 (d,  $J=4.8$ ), 126.6 (s), 119.6 (d,  $J=33.3$ ), 111.8 (d,  $J=79.8$ ), 63.8 (d,  $J=22.8$ ), 43.7 (dd,  $J=7.7$ , 3.7), 42.3 – 40.9 (m), 36.3 (dd,  $J=17.0$ , 15.6), 34.3 (d,  $J=28.2$ ), 33.8 – 33.1 (m), 32.8 (s), 28.1 (dd,  $J=31.4$ , 1.3), 24.9 (dd,

$J=12.5, 8.0, 22.5$  (d,  $J=12.7$ ),  $21.7 - 20.4$  (m),  $15.2$  (d,  $J=6.7$ ),  $14.7$  (s). **HRMS (ESI<sup>+</sup>)** Calcd. for  $C_{31}H_{38}ClO_2P$  [M+Na<sup>+</sup>]: 531.2196, Found: 531.2204.



### The reaction of 10 with formaldehyde.

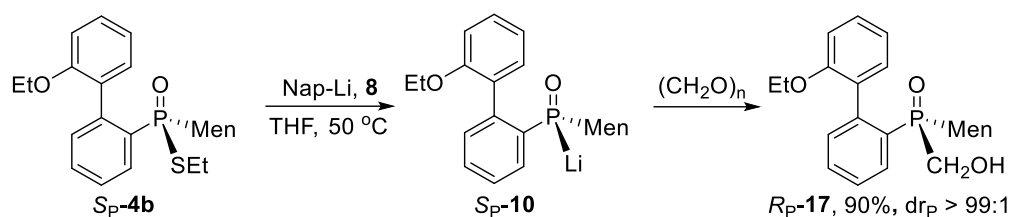

To the solution of **Sp-4b** (50 mg, 0.112 mmol) in THF (1 mL), lithium naphthalene **8** (naphthalene /Li = 1.5:1, 0.23 mL, 1 M, 0.23 mmol) was added dropwise at 50 °C. After stirred for 0.5 hours, the mixture was cooled to room temperature. Paraformaldehyde (10.1 mg, 0.336 mmol) was added and the mixture was stirred at room temperature for 5 hours. Saturated solution of ammonium chloride (5 mL) was added. The mixture was extracted with dichloromethane (3×5 mL), washed with water (3×5 mL), dried over magnesium sulfate. After removing the solvents, the residue was purified with preparative TLC (silica gel, petroleum ether/ethyl acetate = 1/2 as eluent) to afford **Rp-17**.

### **Rp-(2'-Ethoxy-[1,1'-biphenyl]-2-yl)(hydroxymethyl)((-)-menthyl) phosphine oxide (**Rp-17**)**

The crude **Rp-17** was obtained from paraformaldehyde, and the pure compound was obtained as

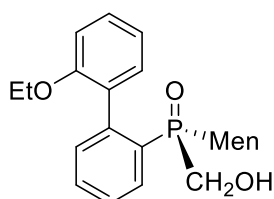

white solid (33.4 mg, 72%, >99:1  $\text{dr}_P$ ) from preparative TLC (silica gel, petroleum ether/ethyl acetate = 1/2 as eluent), m.p. 157.5 – 161.3 °C;

$^{31}\text{P}$  NMR (202 MHz,  $\text{CDCl}_3$ )  $\delta$  = 43.32 (s);  $^1\text{H}$  NMR (500 MHz,

$\text{CDCl}_3$ )  $\delta$  = 8.00 (d,  $J$ =8.1 Hz, 1H), 7.49 – 7.25 (m, 4H), 7.19 – 7.13

(m, 1H), 7.03 – 6.86 (m, 2H), 4.01 – 3.87 (m, 2H), 3.71 (dd,  $J$ =77.5, 15.2 Hz, 2H), 2.32 –

2.16 (m, 1H), 1.95 (t,  $J$ =11.3 Hz, 1H), 1.67 (dd,  $J$ =21.0, 10.1 Hz, 1H), 1.62 – 1.49 (m,

3H), 1.15 (dt,  $J$ =33.2, 6.9 Hz, 4H), 0.75 (dt,  $J$ =13.2, 6.6 Hz, 5H), 0.71 – 0.62 (m, 4H),

0.27 (d,  $J$ =6.7 Hz, 2H), 0.16 (d,  $J$ =6.8 Hz, 1H);  $^{13}\text{C}$  { $^1\text{H}$ } NMR (126 MHz,  $\text{CDCl}_3$ )  $\delta$

= 155.1 (d,  $J$ =46.2), 139.9 (dd,  $J$ =31.5, 9.6), 131.4 (d,  $J$ =7.1), 131.2 (s), 130.9 (d,  $J$ =8.4),

129.6 (s), 128.9 (s), 128.8 (s), 126.2 (d,  $J$ =10.1), 126.1 (d,  $J$ =10.3), 118.9 (d,  $J$ =23.2),

110.6 (d,  $J$ =16.9), 62.7 (d,  $J$ =7.2), 60.3 (d,  $J$ =69.9), 57.7 (d,  $J$ =70.3), 42.4 (d,  $J$ =3.7), 39.4

(dd,  $J$ =62.2, 52.2), 33.9 (s), 33.1 (d,  $J$ =14.6), 32.5 (dd,  $J$ =38.1, 13.9), 27.4 (d,  $J$ =25.7),

23.7 (dd,  $J$ =12.2, 6.3), 21.4 (s), 20.6 (d,  $J$ =15.7), 14.1 (d,  $J$ =21.0), 13.6 (d,  $J$ =6.1). HRMS

(ESI<sup>+</sup>) Calcd. for  $\text{C}_{25}\text{H}_{35}\text{O}_3\text{P}$  [ $\text{M}+\text{Na}^+$ ]: 437.2221, Found: 437.2221.

**Part 6. Crystallographic information 3/3', 4e and 5.**

**Table S1. Crystallography data of *S<sub>P</sub>-3***

The single crystal suited for the X-ray diffraction was obtained from the evaporation of the solution of *S<sub>P</sub>-3* in dichloromethane : petroleum ether = 2:1 at -40 °C.

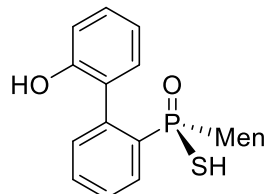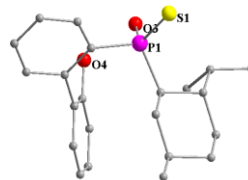

| Empirical formula           | C <sub>22</sub> H <sub>29</sub> O <sub>2</sub> PS |
|-----------------------------|---------------------------------------------------|
| Crystal system              | Monoclinic                                        |
| space group                 | P21 (No. 4)                                       |
| Formula weight              | 742.90                                            |
| a, Å                        | 8.7606(8)                                         |
| b, Å                        | 16.4868(14)                                       |
| c, Å                        | 14.1957(12)                                       |
| α, deg                      | 90                                                |
| β, deg                      | 97.089(3)                                         |
| γ, deg                      | 90                                                |
| V, Å <sup>3</sup>           | 2034.7(3)                                         |
| Z                           | 2                                                 |
| T, K                        | 298                                               |
| λ, Å                        | 0.71073                                           |
| ρ, Mg m <sup>-3</sup>       | 1.213                                             |
| R <sub>int</sub>            | 0.028                                             |
| R <sub>1</sub> [I N 2σ(I)]  | 0.0444                                            |
| R <sub>1</sub> (all data)   | 0.0742                                            |
| wR <sub>2</sub> [I N 2σ(I)] | 0.0958                                            |
| wR <sub>2</sub> (all data)  | 0.1104                                            |
| Flack                       | 0.03(5)                                           |
| CCDC                        | 1975584                                           |

**Table S2. Crystallography data of *R<sub>P</sub>-3'*.**

The single crystal suited for the X-ray diffraction was obtained from the evaporation of the solution of *R<sub>P</sub>-3'* in dichloromethane : petroleum ether = 2:1 at -40 °C.

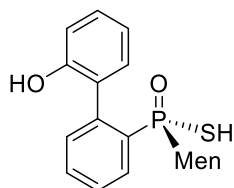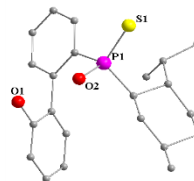

| Empirical formula           | C <sub>22</sub> H <sub>29</sub> O <sub>2</sub> PS |
|-----------------------------|---------------------------------------------------|
| Crystal system              | Monoclinic                                        |
| space group                 | P2 <sub>1</sub> (No.4)                            |
| Formula weight              | 507.86                                            |
| a, Å                        | 9.8758(8)                                         |
| b, Å                        | 10.6484(9)                                        |
| c, Å                        | 12.6525(11)                                       |
| α, deg                      | 90                                                |
| β, deg                      | 100.229(2)                                        |
| γ, deg                      | 90                                                |
| V, Å <sup>3</sup>           | 1309.41(19)                                       |
| Z                           | 2                                                 |
| T, K                        | 298                                               |
| λ, Å                        | 0.71073                                           |
| ρ, Mg m <sup>-3</sup>       | 1.288                                             |
| R <sub>int</sub>            | 0.026                                             |
| R <sub>1</sub> [I N 2σ(I)]  | 0.0486                                            |
| R <sub>1</sub> (all data)   | 0.0775                                            |
| wR <sub>2</sub> [I N 2σ(I)] | 0.1065                                            |
| wR <sub>2</sub> (all data)  | 0.1227                                            |
| Flack                       | 0.07(4)                                           |
| CCDC                        | 1975582                                           |

**Table S3. Crystallograph data of *S<sub>p</sub>-4e***

The single crystal suited for the X-ray diffraction was obtained from the evaporation of the solution of *S<sub>p</sub>-4e* in dichloromethane and petroleum ether.

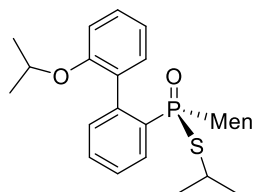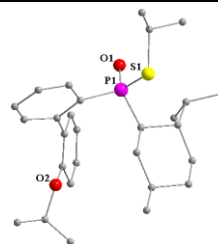

| Empirical formula     | C <sub>28</sub> H <sub>41</sub> O <sub>2</sub> PS |
|-----------------------|---------------------------------------------------|
| Crystal system        | Monoclinic                                        |
| space group           | P21 (No.4)                                        |
| Formula weight        | 472.65                                            |
| a, Å                  | 9.9896(9)                                         |
| b, Å                  | 29.437(3)                                         |
| c, Å                  | 10.1391(12)                                       |
| α, deg                | 90                                                |
| β, deg                | 115.543(4)                                        |
| γ, deg                | 90                                                |
| V, Å <sup>3</sup>     | 2690.1(5)                                         |
| Z                     | 4                                                 |
| T, K                  | 298                                               |
| λ, Å                  | 0.71073                                           |
| ρ, Mg m <sup>-3</sup> | 1.167                                             |
| R <sub>int</sub>      | 0.113                                             |
| R1 [I N 2σ(I)]        | 0.1207                                            |
| R1 (all data)         | 0.2120                                            |
| wR2 [I N 2σ(I)]       | 0.3072                                            |
| wR2 (all data)        | 0.3554                                            |
| Flack                 | 0.31(17)                                          |
| CCDC                  | 1975583                                           |

**Table S4. Crystallograph data of *R<sub>P</sub>-5***

The single crystal suited for the X-ray diffraction was obtained from the evaporation of the solution of *R<sub>P</sub>-5* in dichloromethane and petroleum ether.

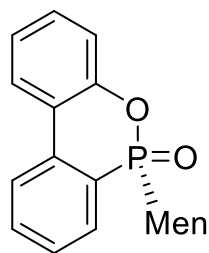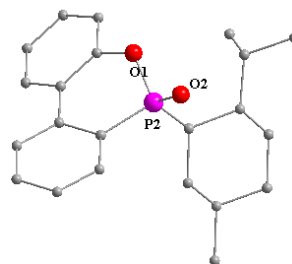

| Empirical formula     | C <sub>22</sub> H <sub>27</sub> O <sub>2</sub> P |
|-----------------------|--------------------------------------------------|
| Crystal system        | Monoclinic                                       |
| space group           | P21 (No.4)                                       |
| Formula weight        | 354.41                                           |
| a, Å                  | 8.6104(9)                                        |
| b, Å                  | 5.6083(6)                                        |
| c, Å                  | 19.2726(19)                                      |
| α, deg                | 90                                               |
| β, deg                | 92.639(3)                                        |
| γ, deg                | 90                                               |
| V, Å <sup>3</sup>     | 929.68(17)                                       |
| Z                     | 2                                                |
| T, K                  | 298                                              |
| λ, Å                  | 0.71073                                          |
| ρ, Mg m <sup>-3</sup> | 1.266                                            |
| R <sub>int</sub>      | 0.064                                            |
| R1 [I N 2σ(I)]        | 0.0789                                           |
| R1 (all data)         | 0.1090                                           |
| wR2 [I N 2σ(I)]       | 0.1500                                           |
| wR2 (all data)        | 0.1669                                           |
| Flack                 | -0.03(19)                                        |
| CCDC                  | 2010827                                          |

Part 7. Selected photocopies of  $^1\text{H}$ ,  $^{31}\text{P}$  and  $^{13}\text{C}$  NMR spectrum

$R_P/S_P$ -6-(-)-Menthyl-6H-dibenzo[*c,e*][1,2]-oxaphosphinine 6-sulfide (2/2')

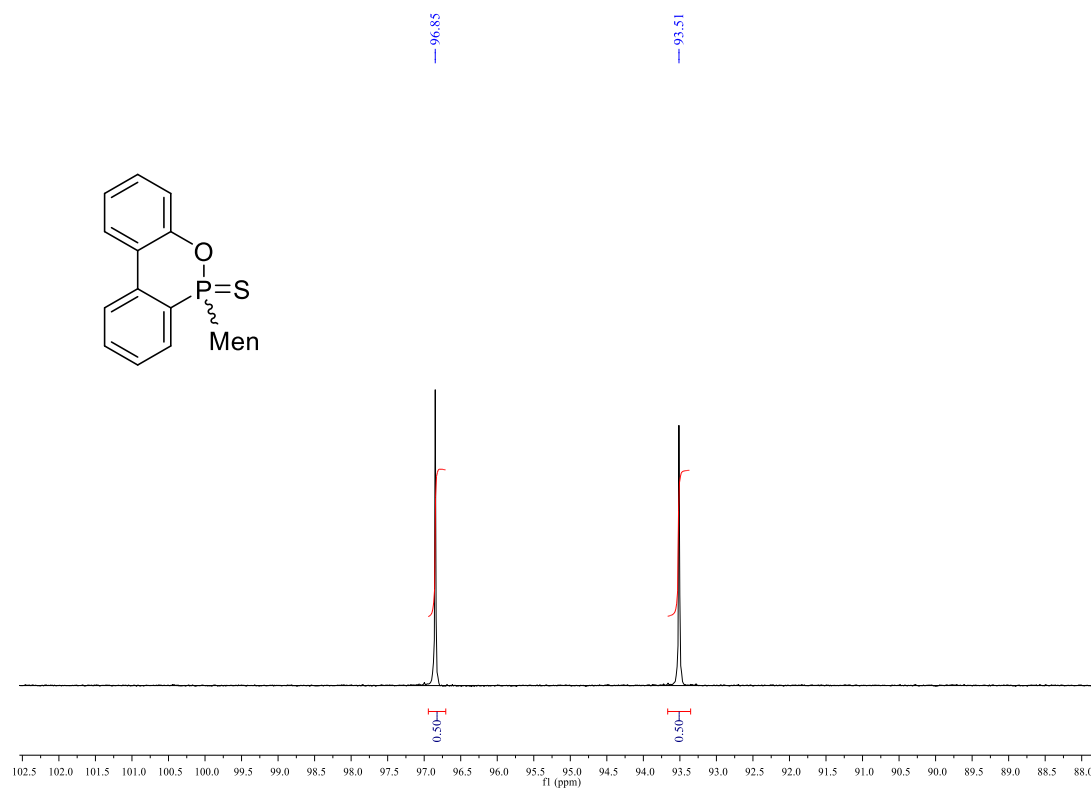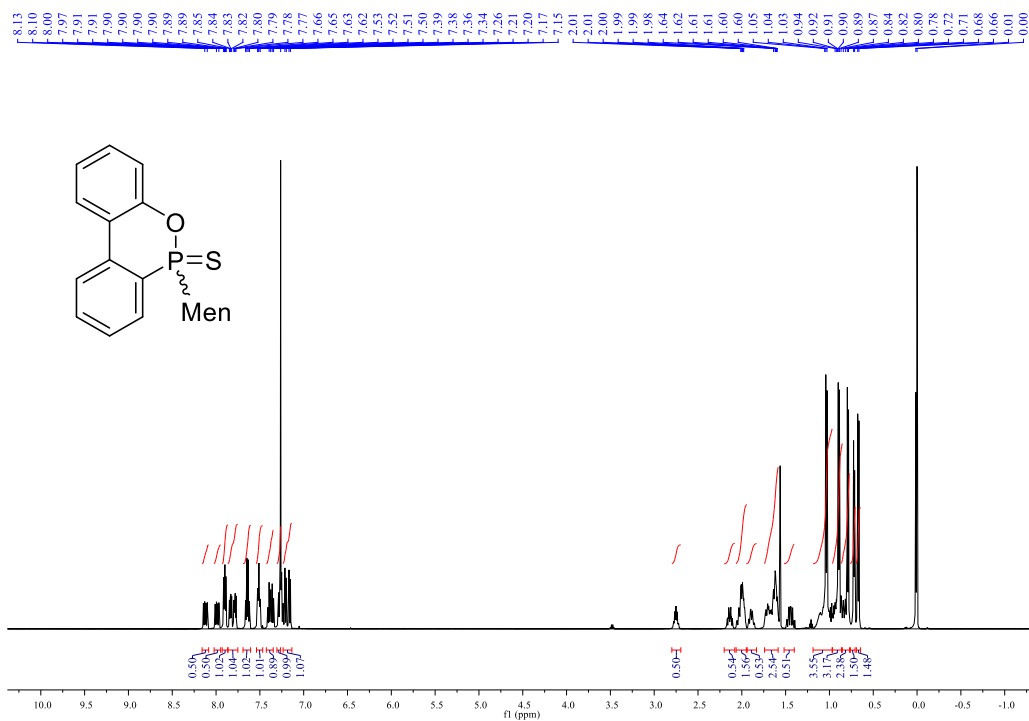

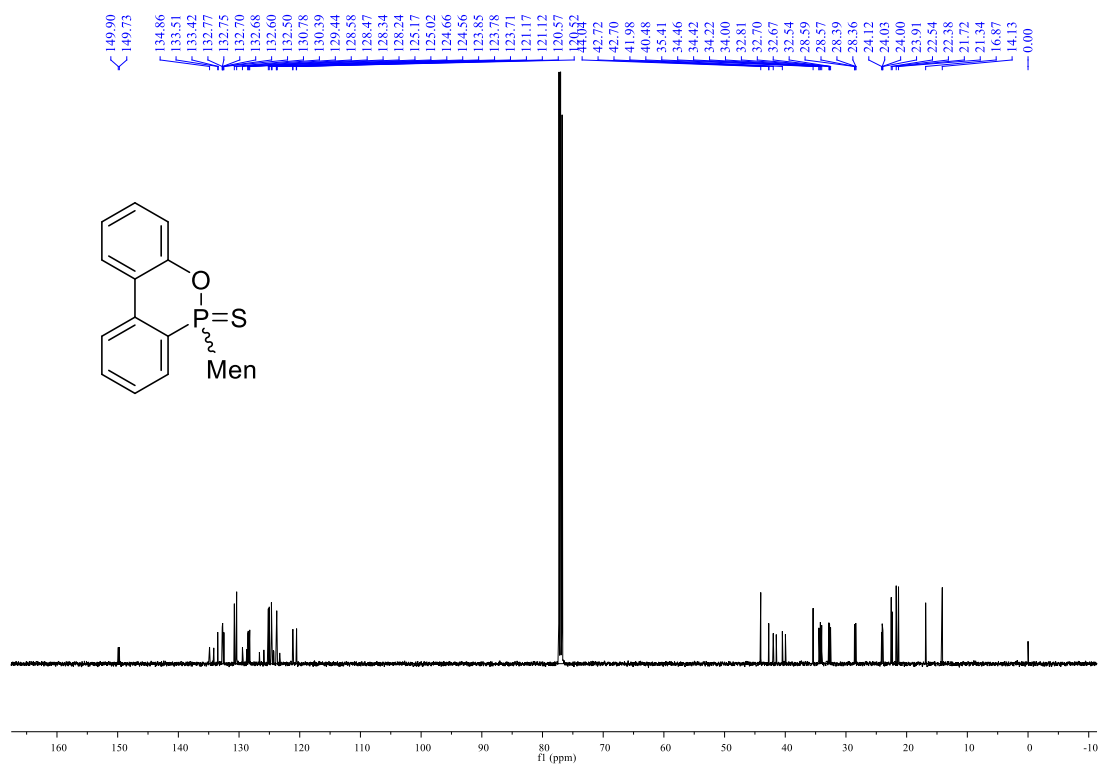

SP-(2'-Hydroxy-[1,1'-biphenyl]-2-yl)((-)-Menthyl)phosphinothioic S-acid (SP-3)

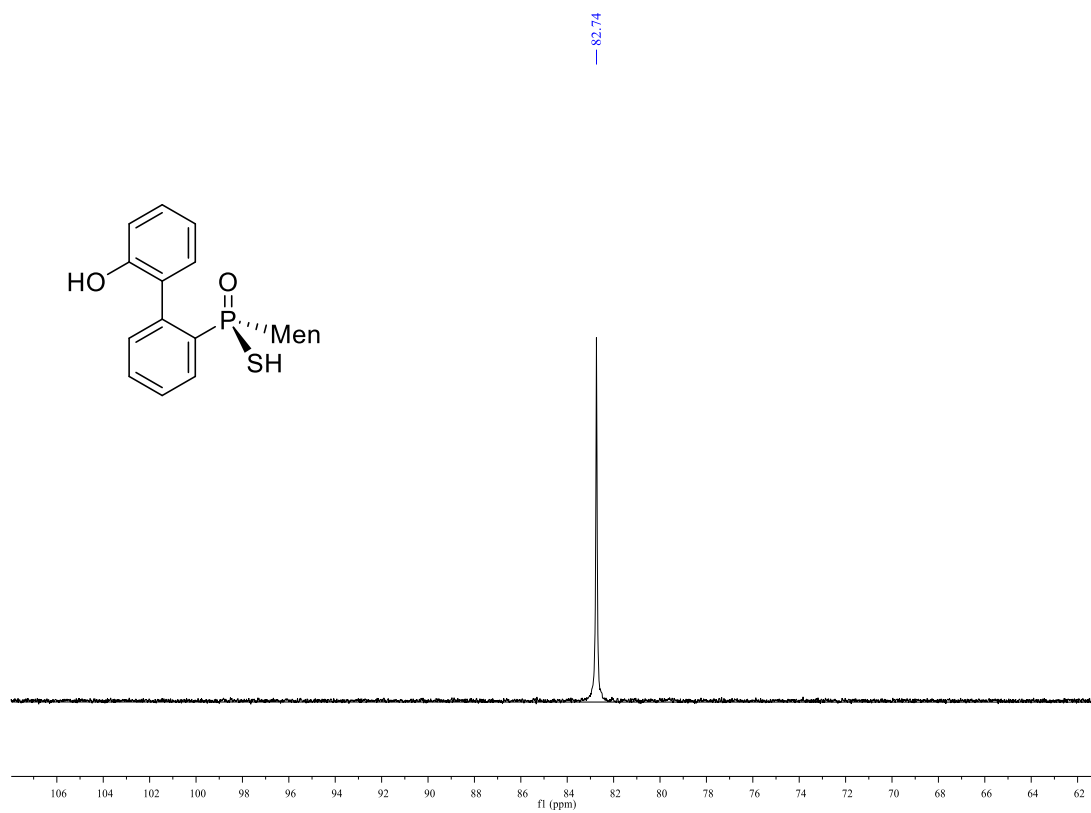

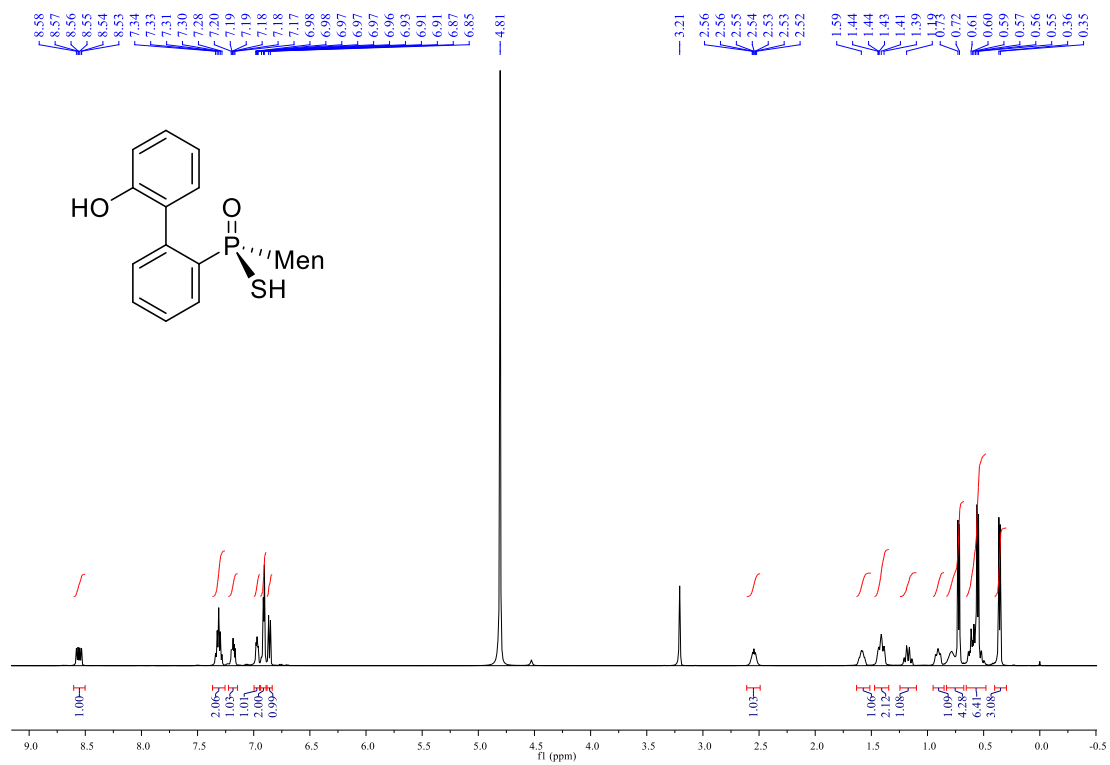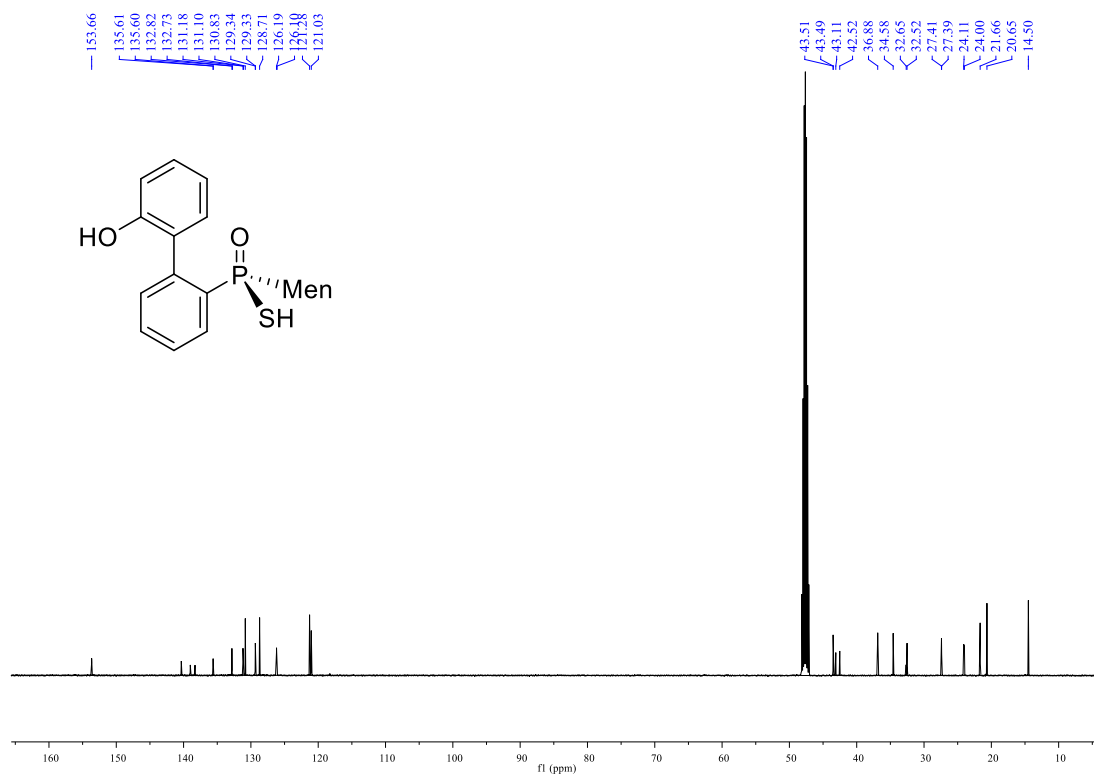



***R<sub>P</sub>*-(2'-Hydroxy-[1,1'-biphenyl]-2-yl)((-)-menthyl)phosphinothioic *S*-acid (*R<sub>P</sub>*-3')**

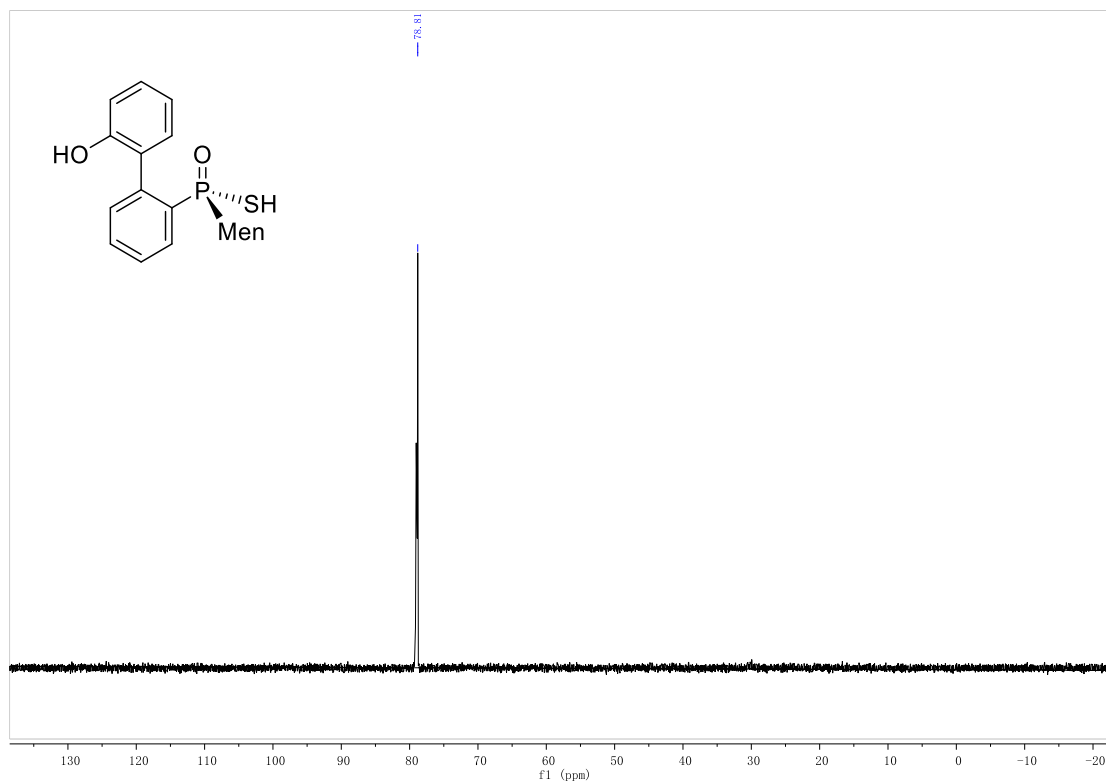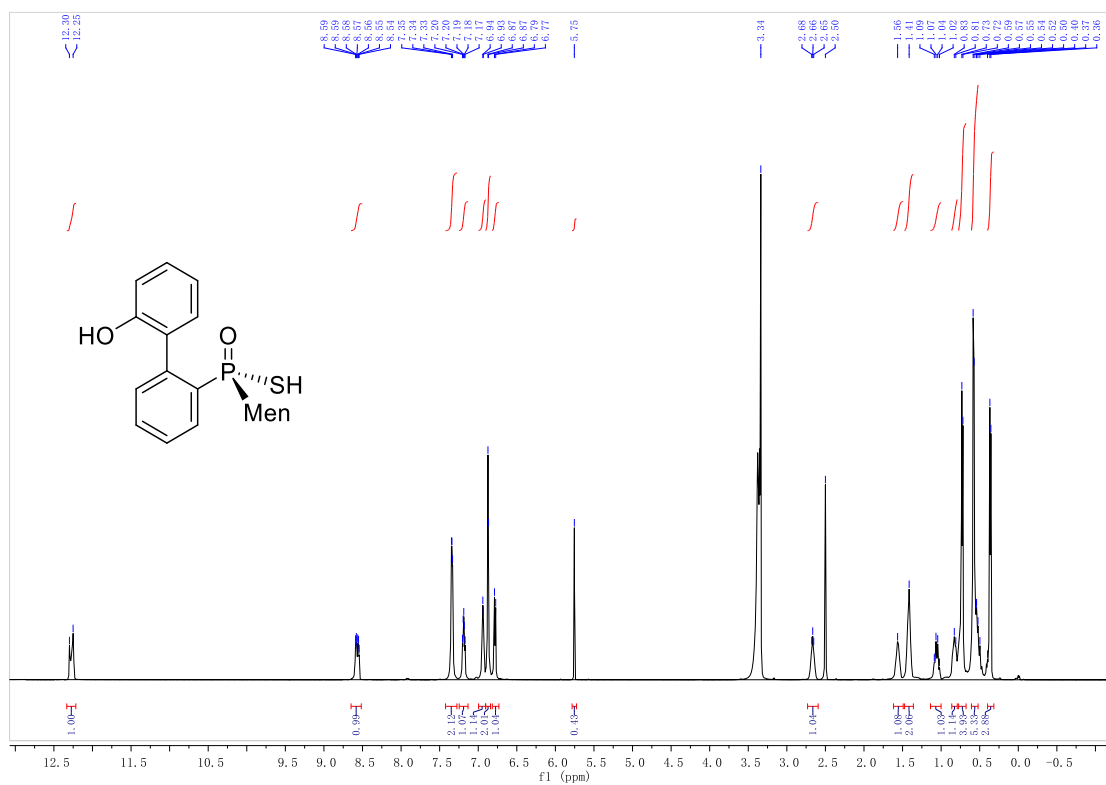

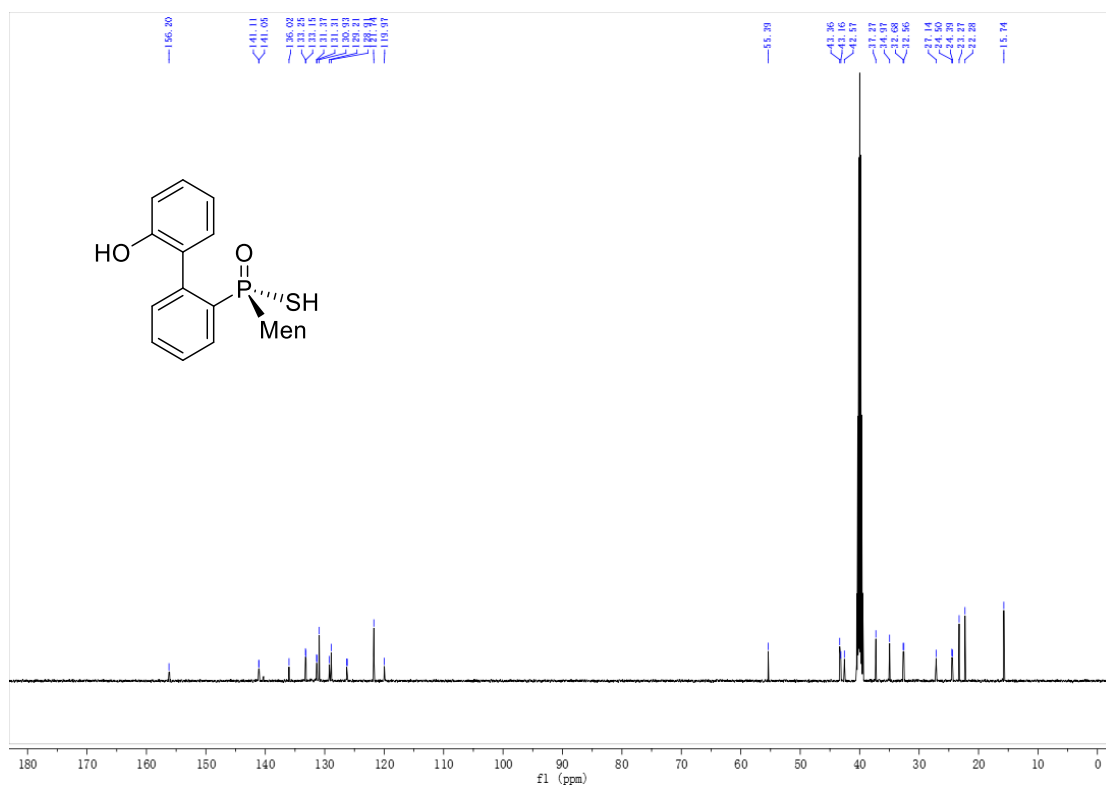

**S<sub>P</sub>-S-Ethyl-(2'-ethoxy-[1,1'-biphenyl]-2-yl)((-)-menthyl)phosphinothioate (S<sub>P</sub>-4b)**

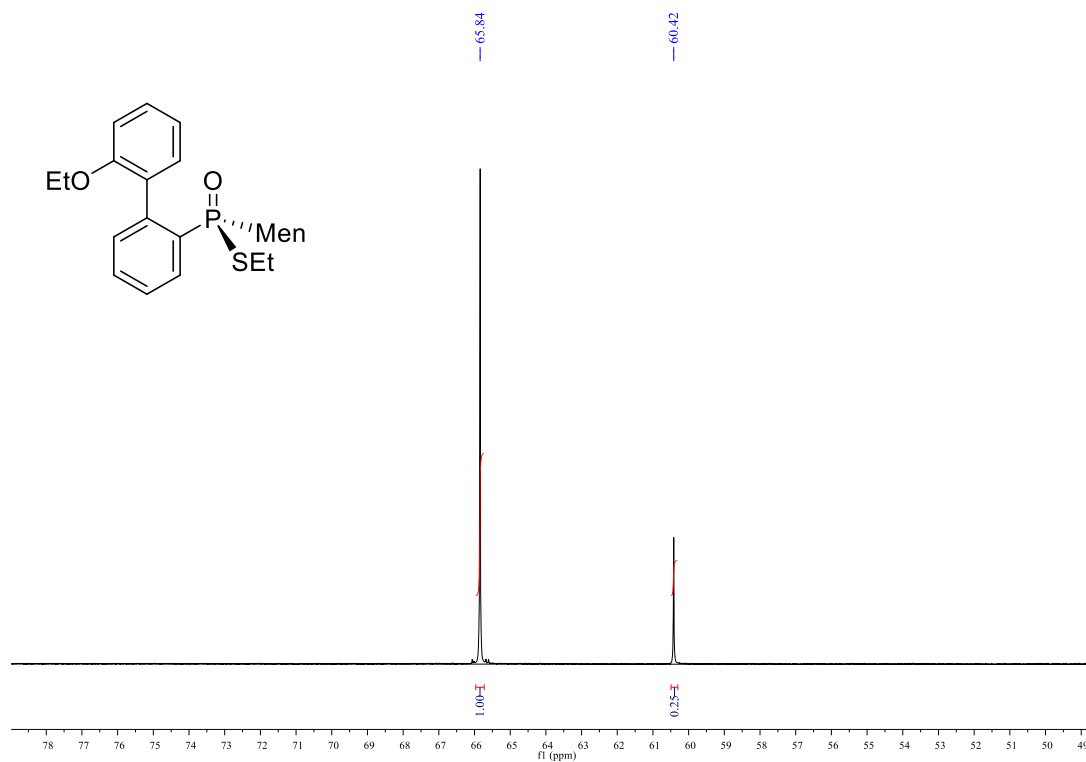

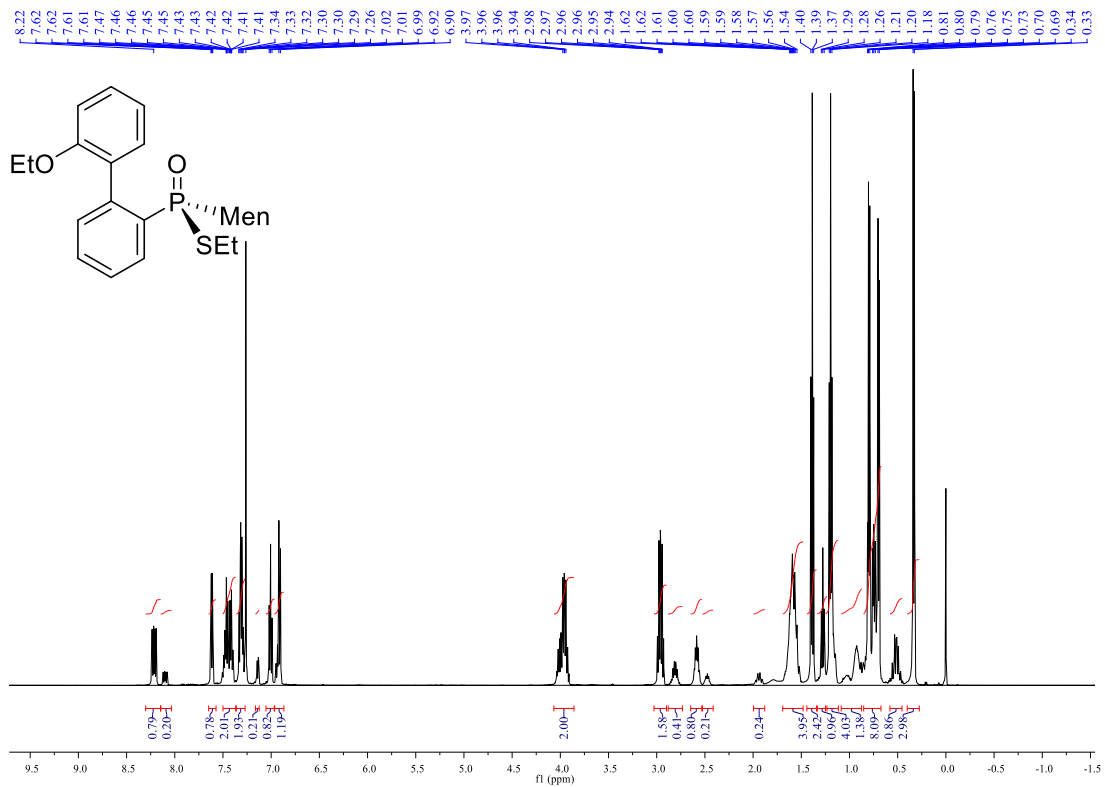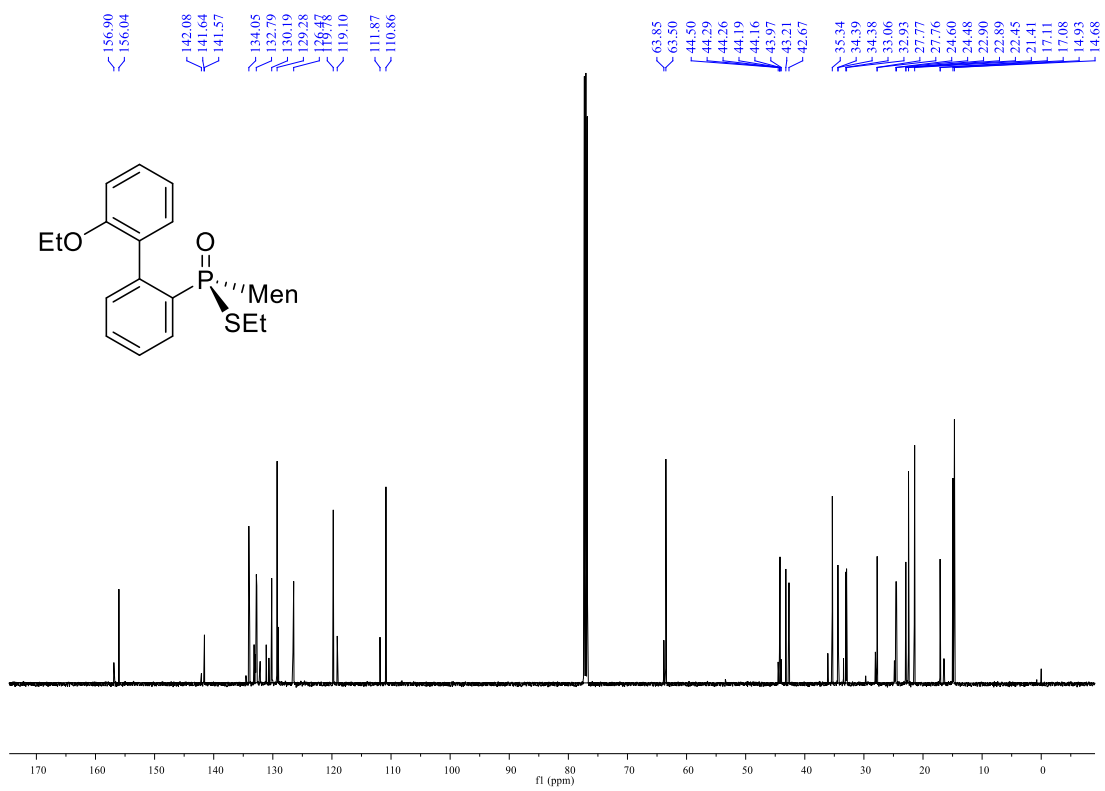

**S<sub>P</sub>-S-Butyl-(2'- butoxy-[1,1'-biphenyl]-2-yl)((-)-menthyl)phosphinothioate (S<sub>P</sub>-4c)**

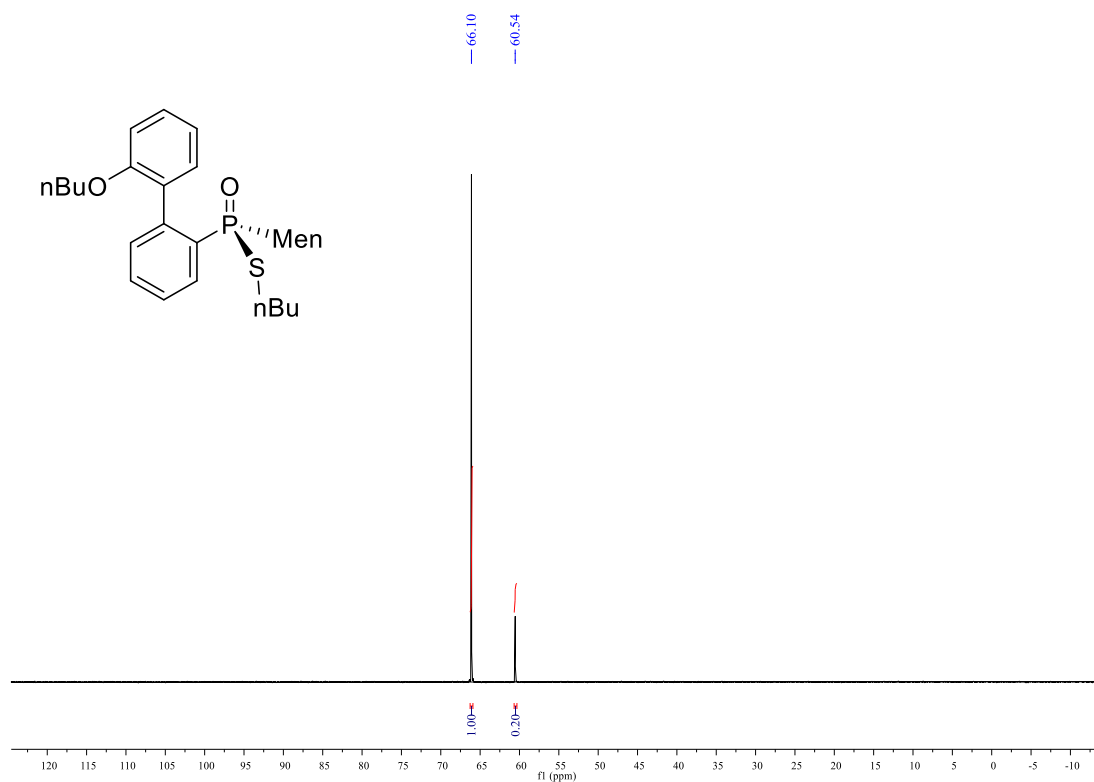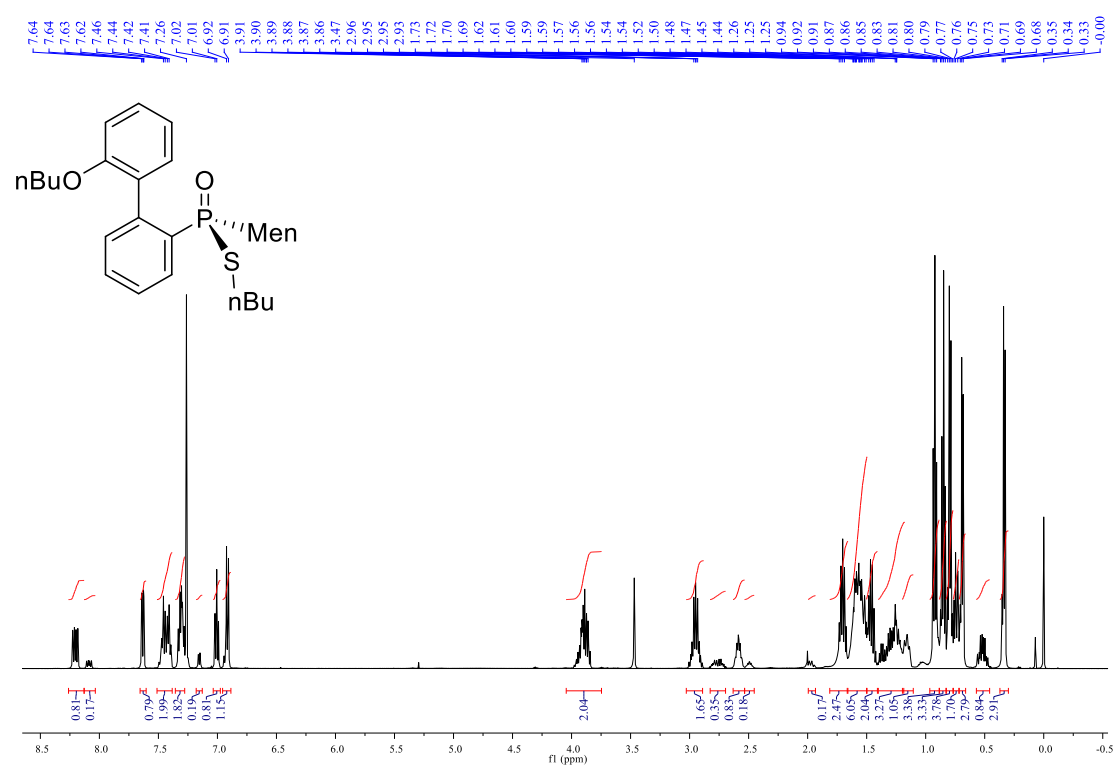

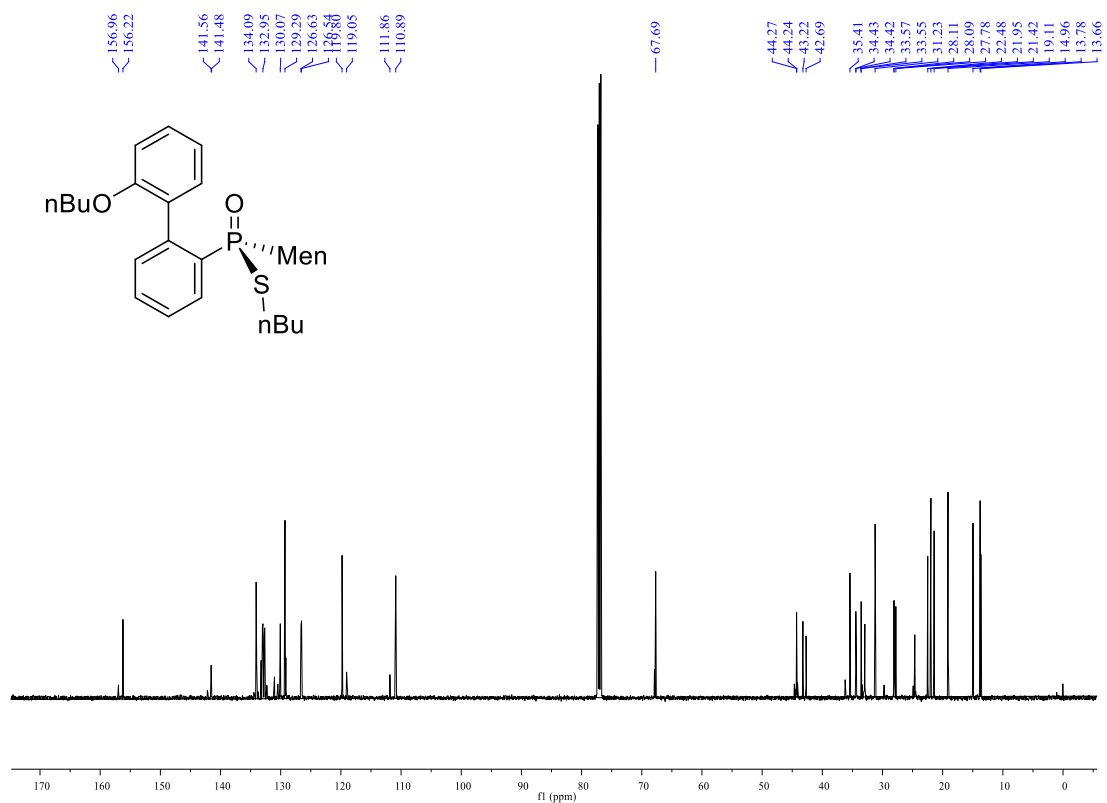

$S_P$ -S-Isobutyl-(2'-isobutoxy-[1,1'-biphenyl]-2-yl)((-)-menthyl) phosphinothioate ( $S_P$ -4d)

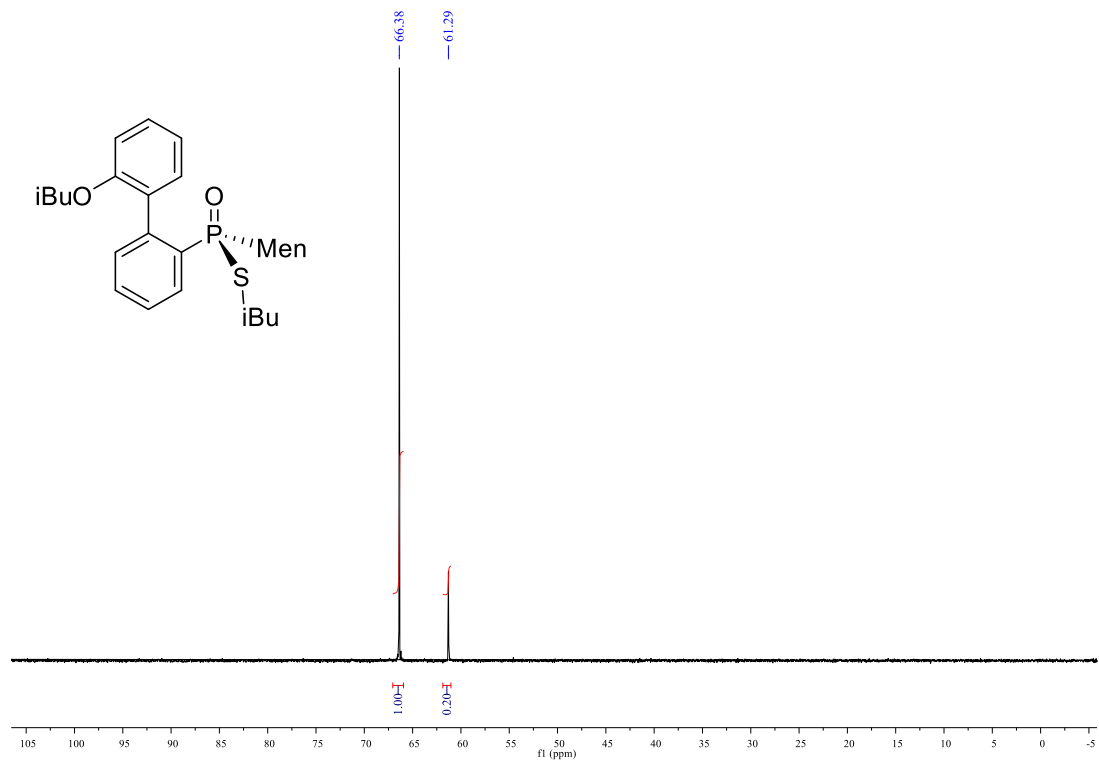

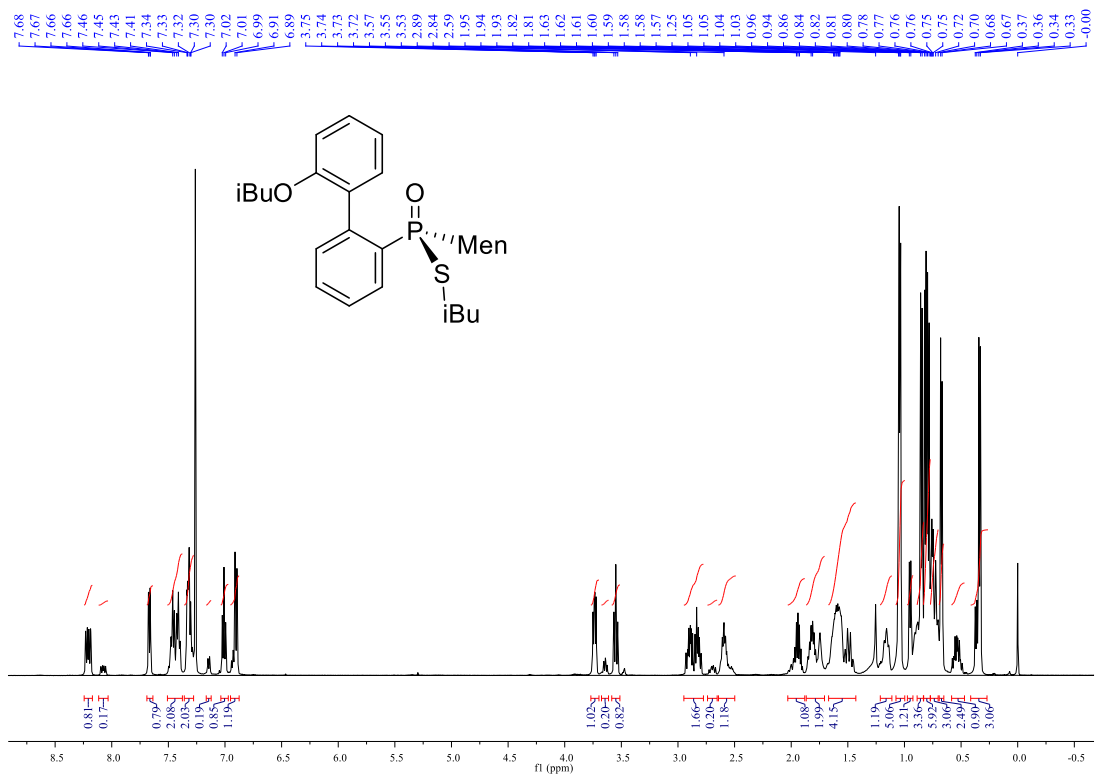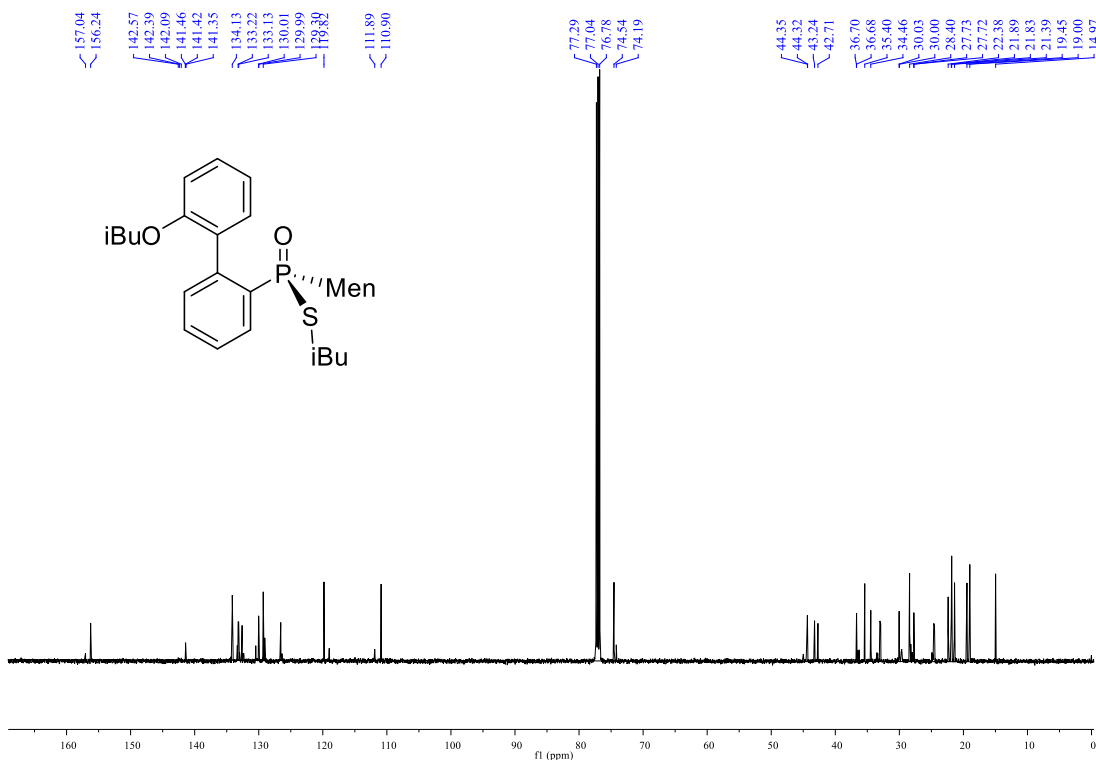

**S<sub>P</sub>-S-Isopropyl-(2'-isopropoxy-[1,1'-biphenyl]-2-yl)((-)-menthyl) phosphinothioate (S<sub>P</sub>-4e)**

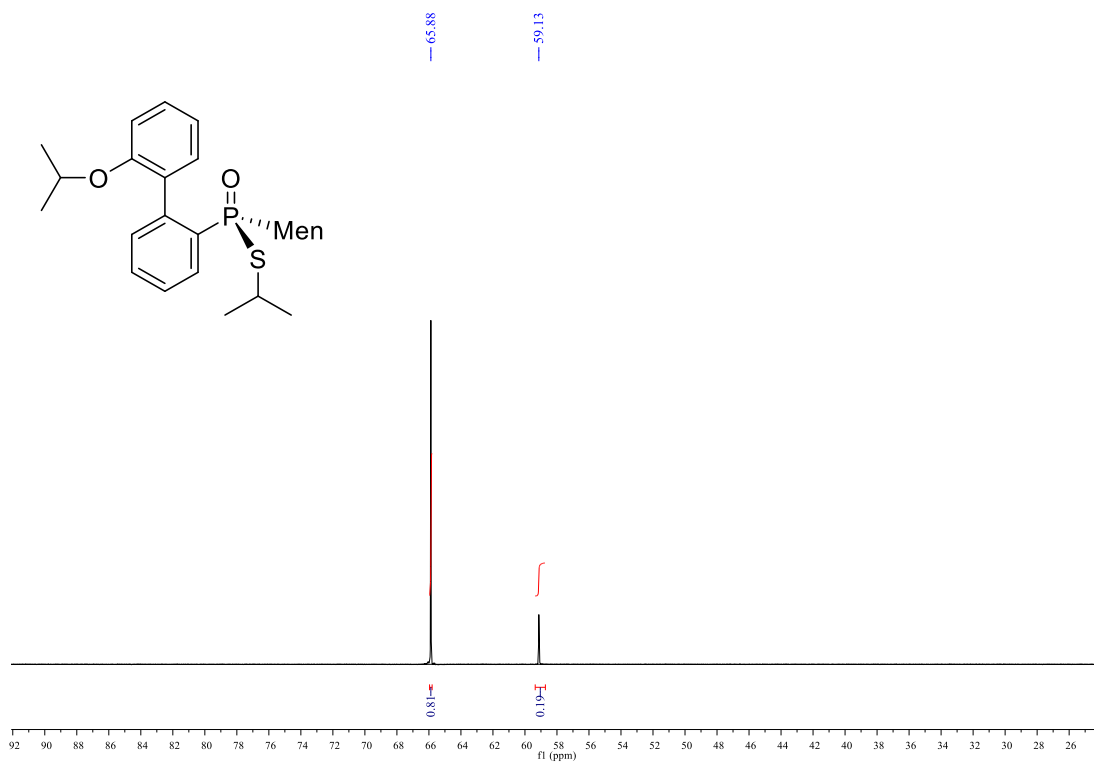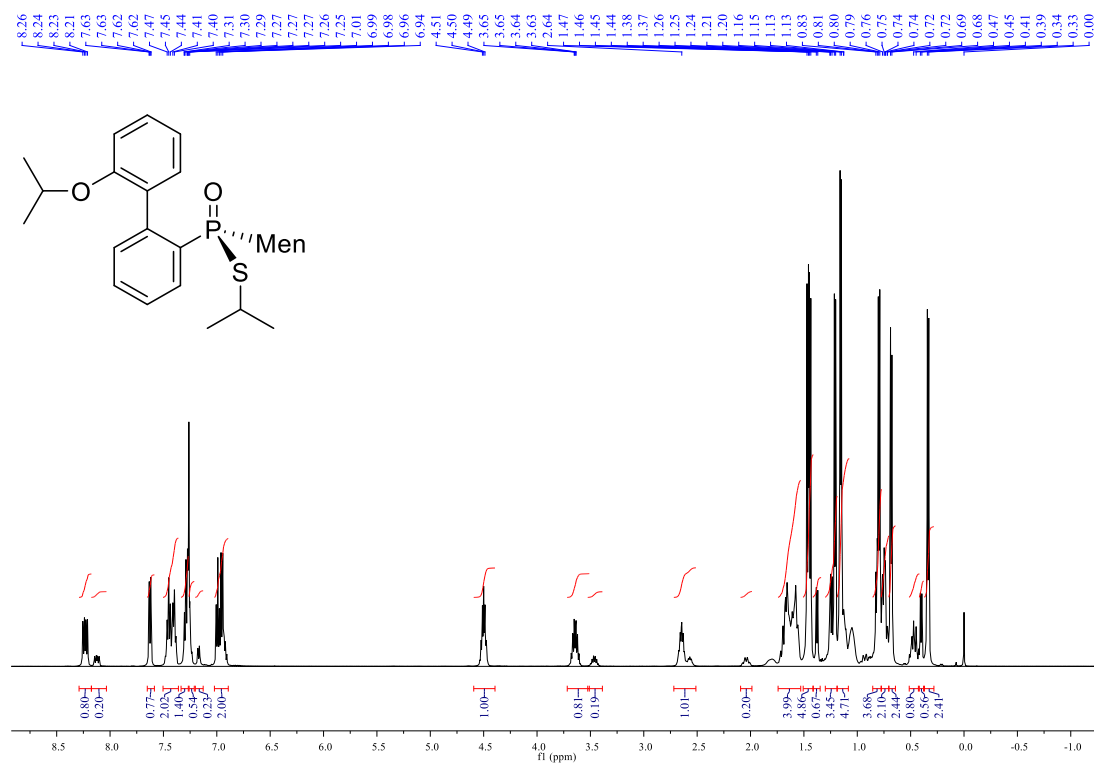

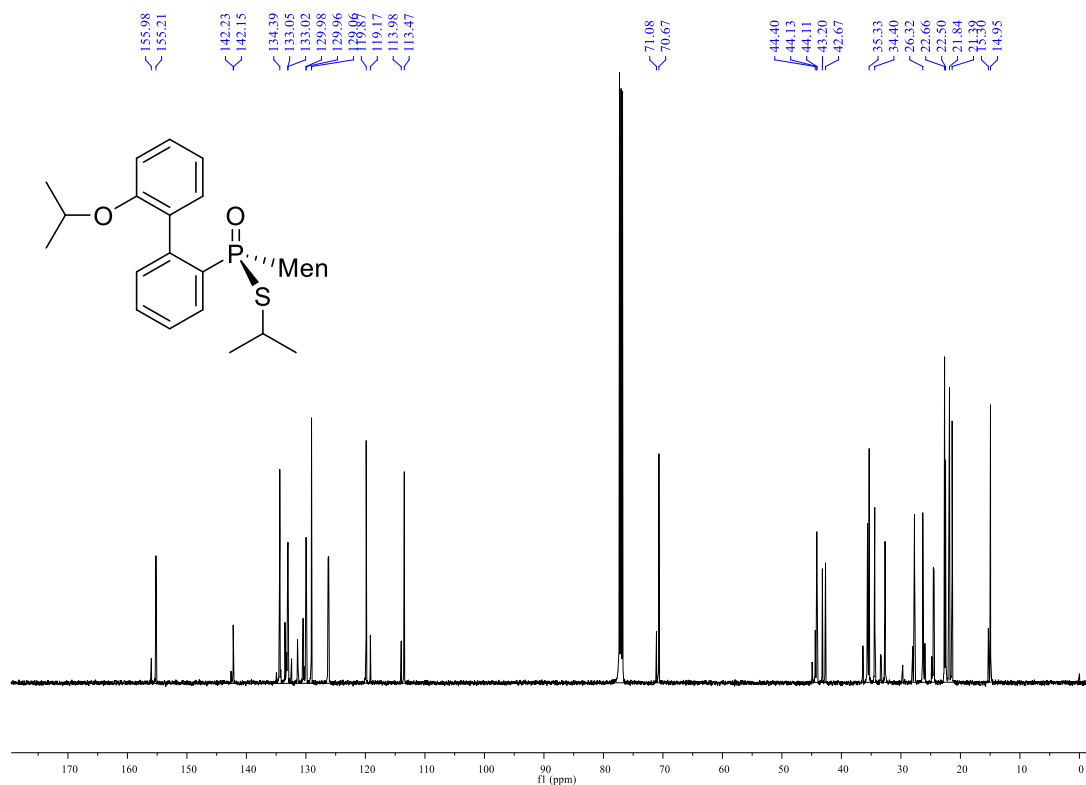

***S<sub>P</sub>*-*S*-Allyl-(2'-(allyloxy)-[1,1'-biphenyl]-2-yl)((-)-menthyl) phosphinothioate (*S<sub>P</sub>*-4f)**

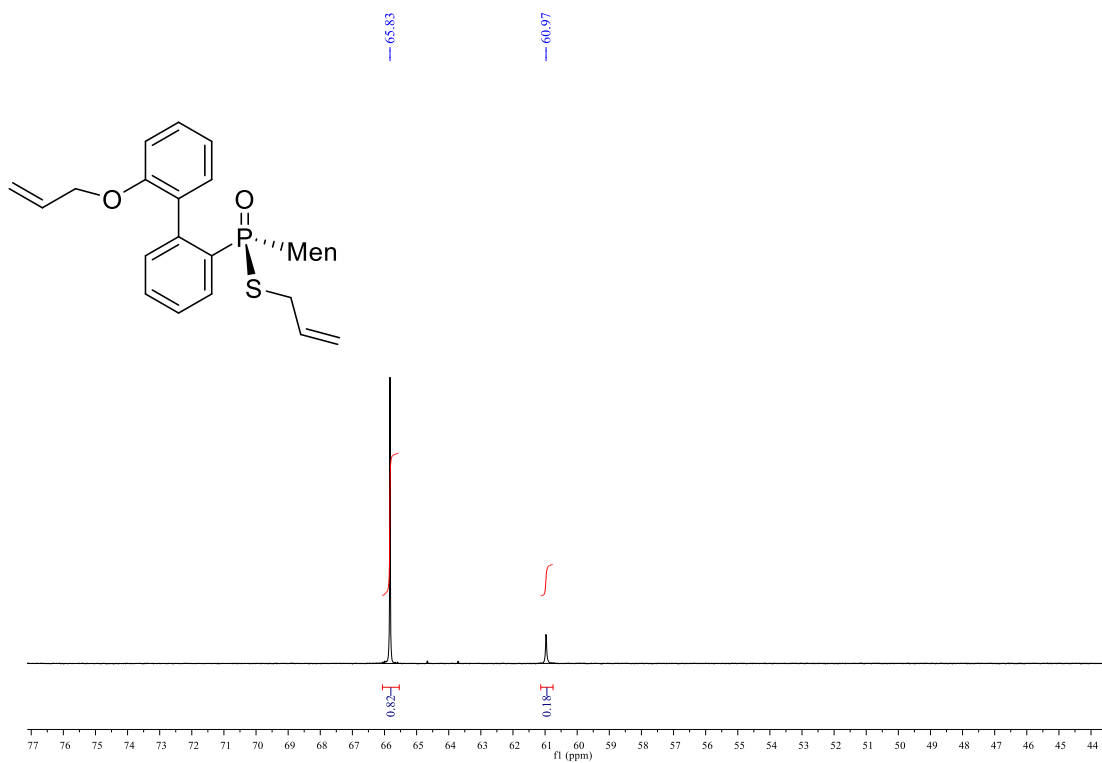



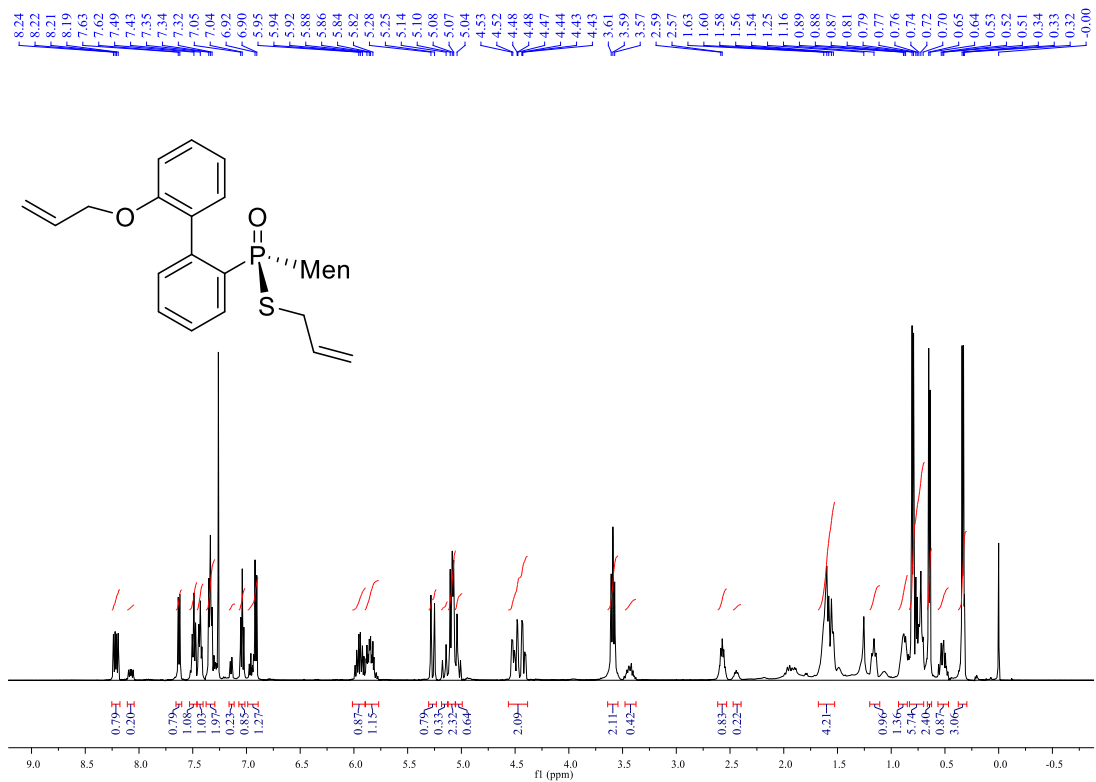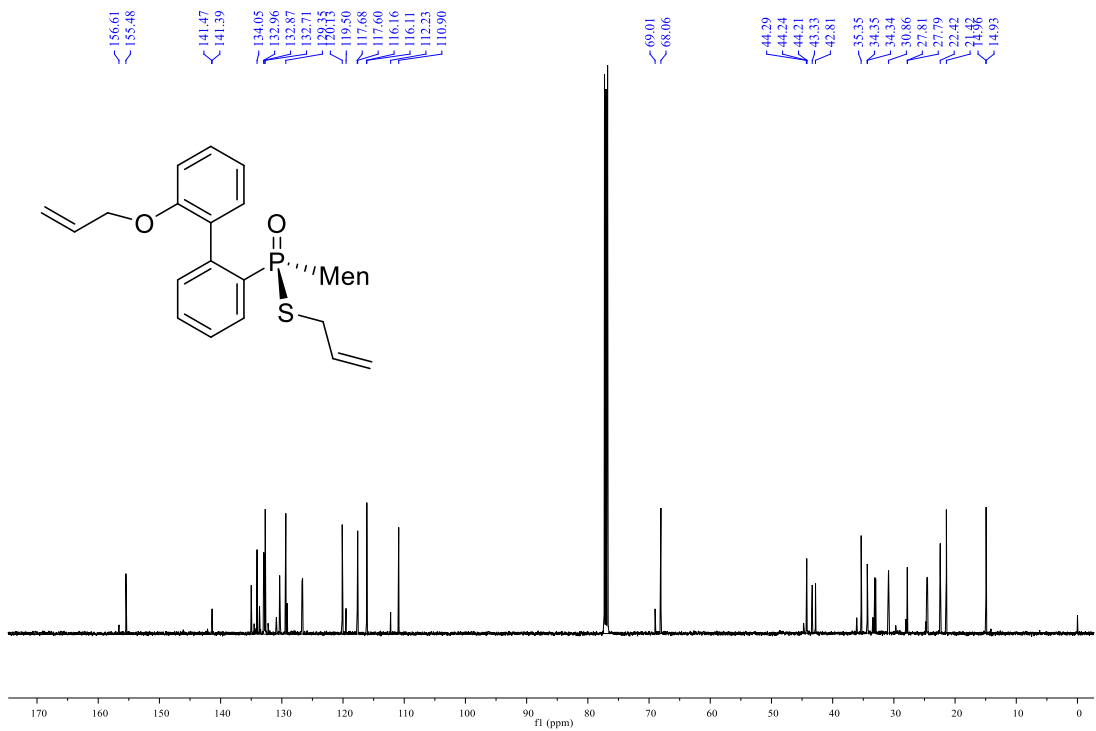

**S<sub>P</sub>-S-Phenethyl-((-)-menthyl)(2'-phenethoxy-[1,1'-biphenyl]-2-yl) phosphinothioate (S<sub>P</sub>-4g)**

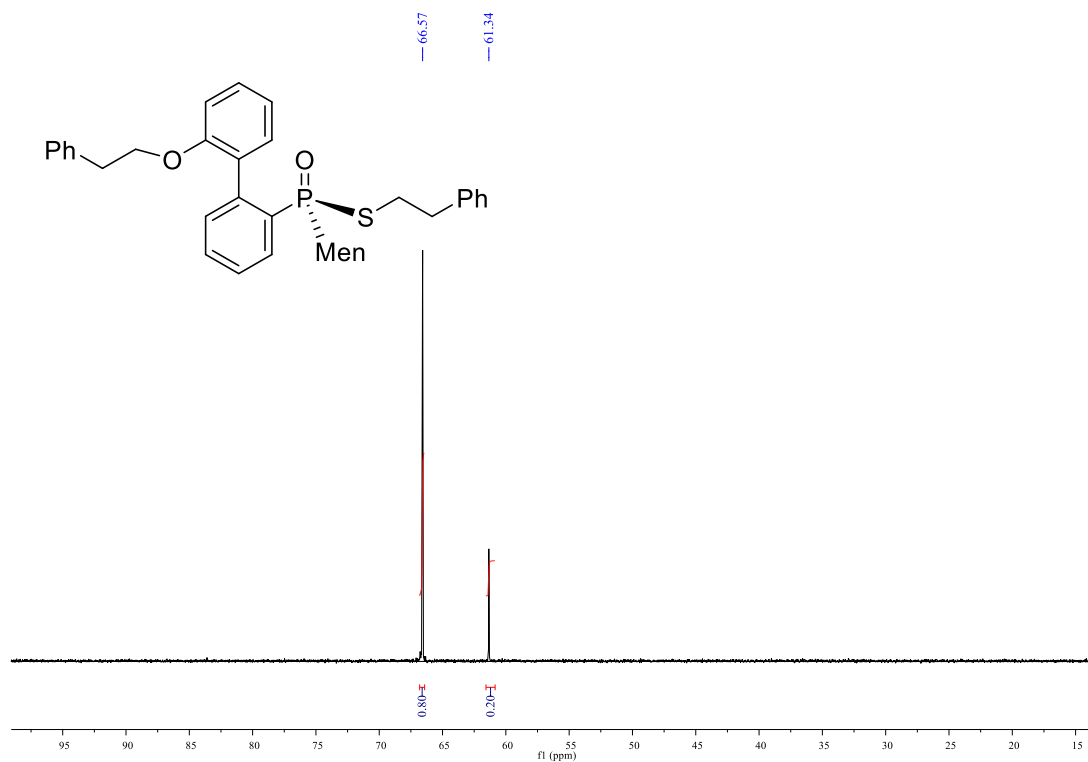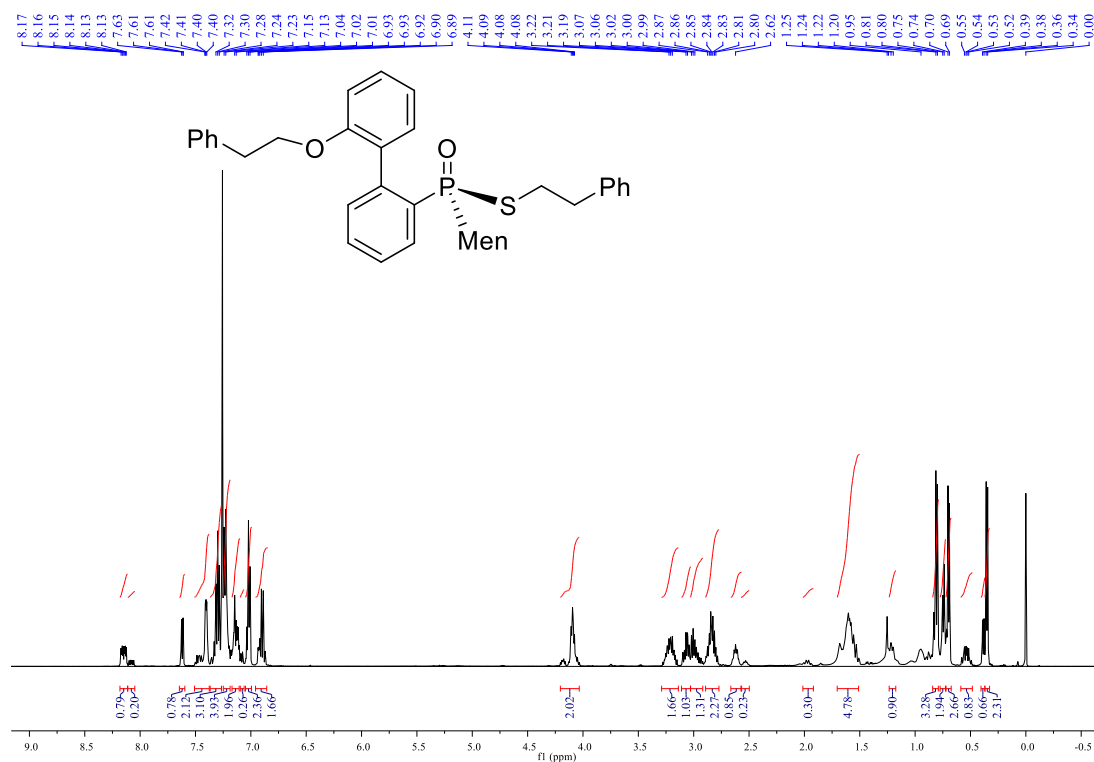

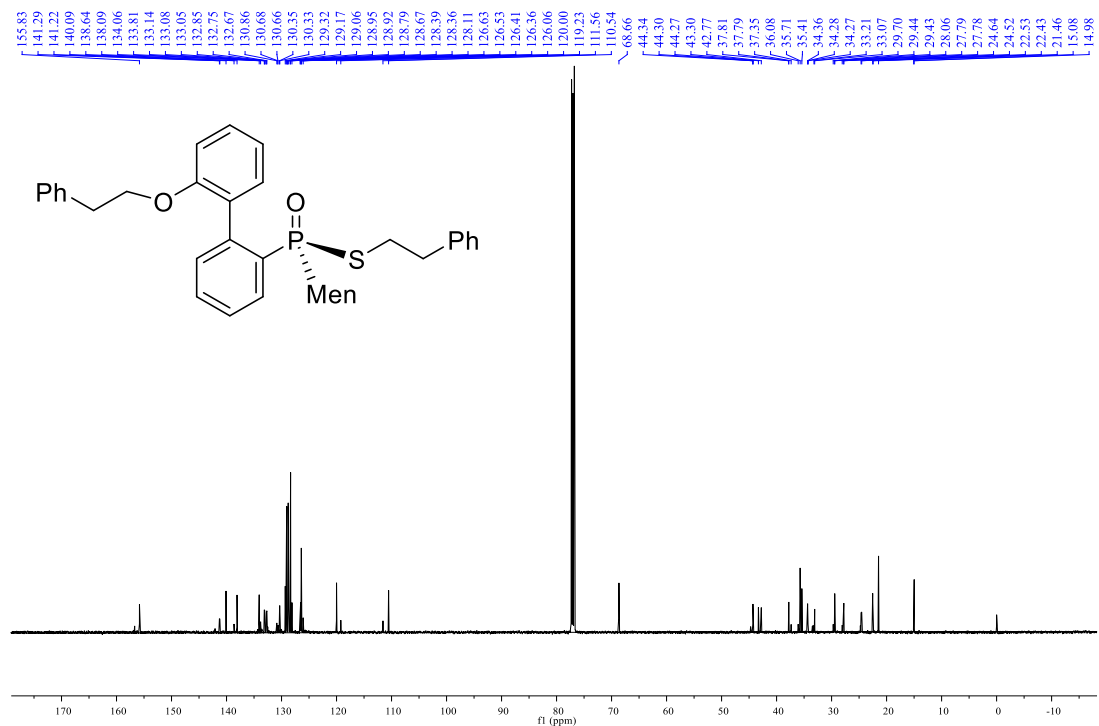

***S<sub>P</sub>*-S-(4-Methylbenzyl)-((-)-Menthyl)(2'-((4-Methylbenzyl)oxy)-[1,1'-biphenyl]-2-yl)phosphin  
othioate (*S<sub>P</sub>*-4j)**

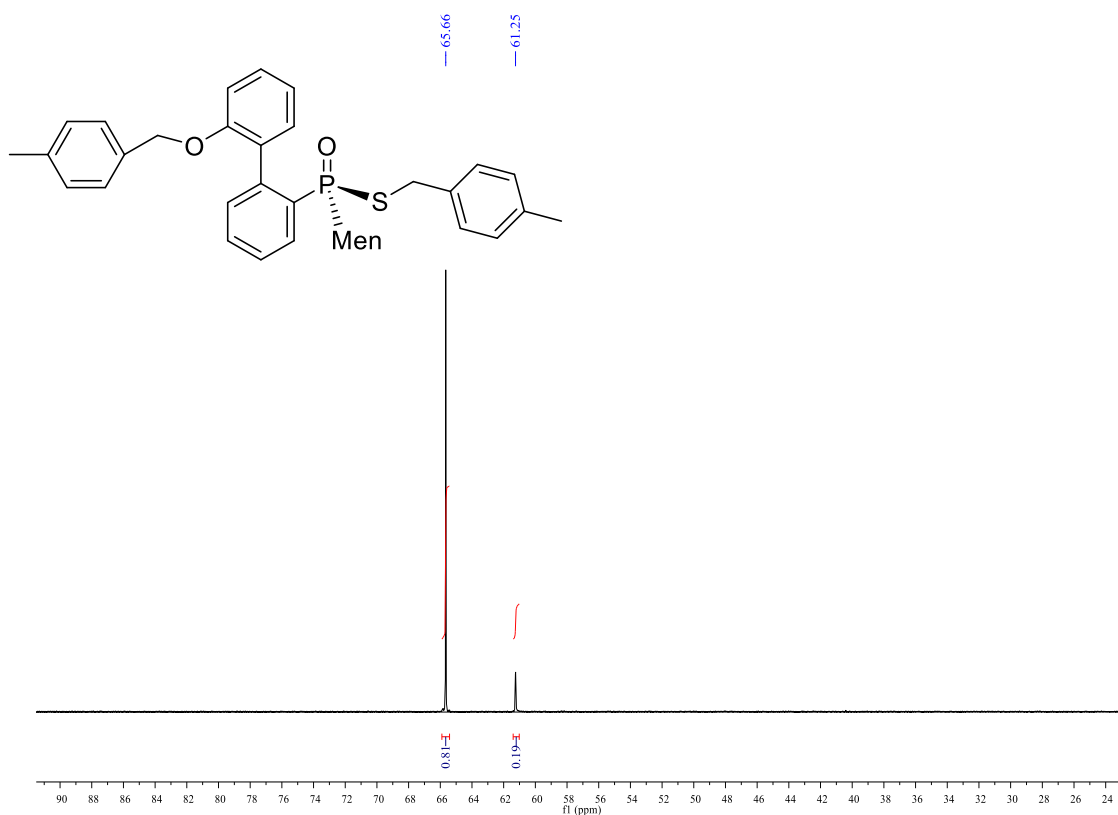

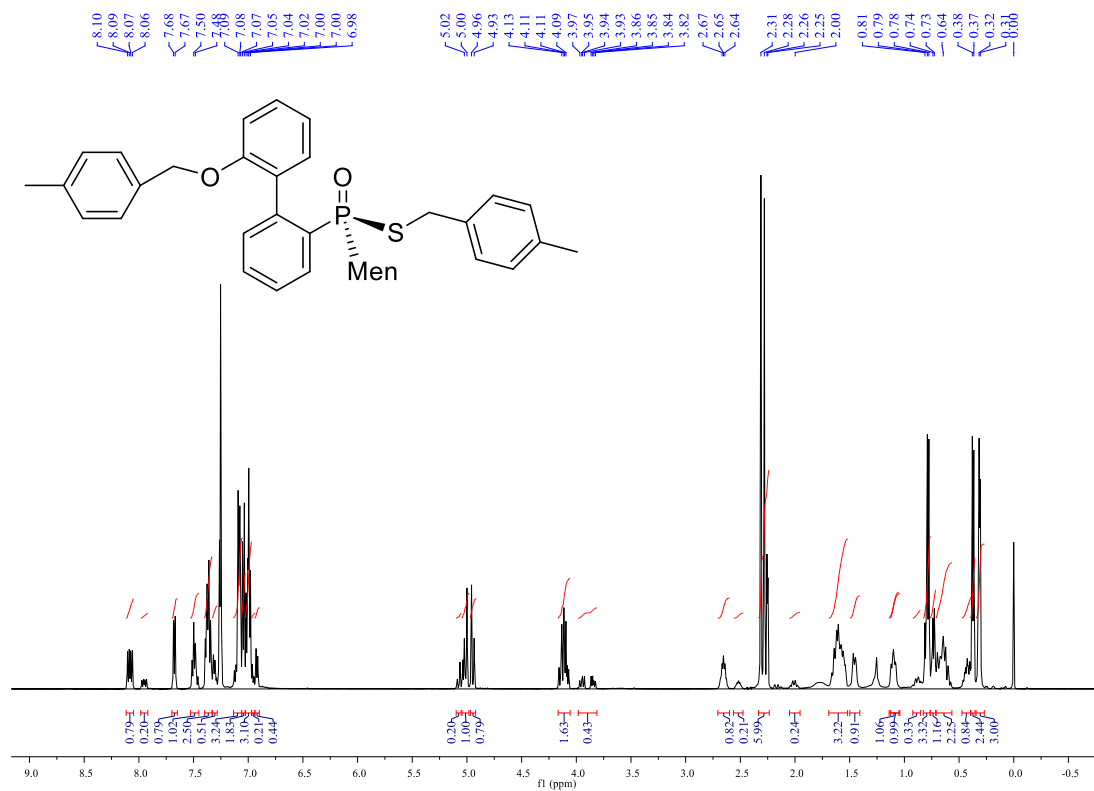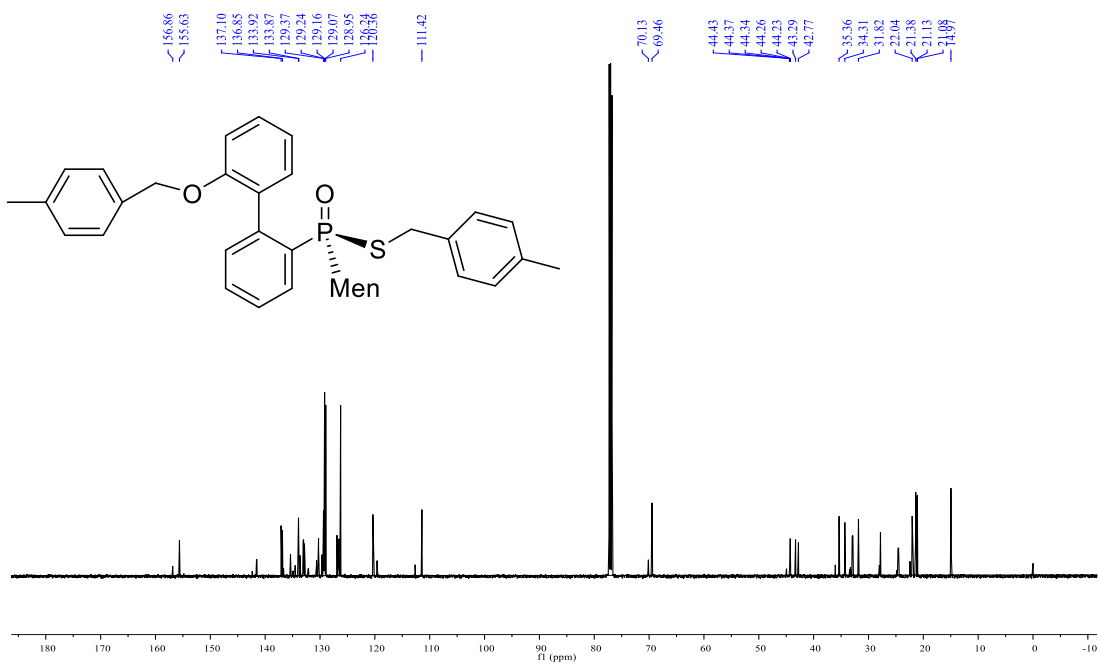

***S<sub>P</sub>*-S-(3-Methoxybenzyl)-((-)-menthyl)(2'-((3-methoxybenzyl)oxy)-[1,1'-biphenyl]-2-yl)phosphinothioate (*S<sub>P</sub>*-4k)**

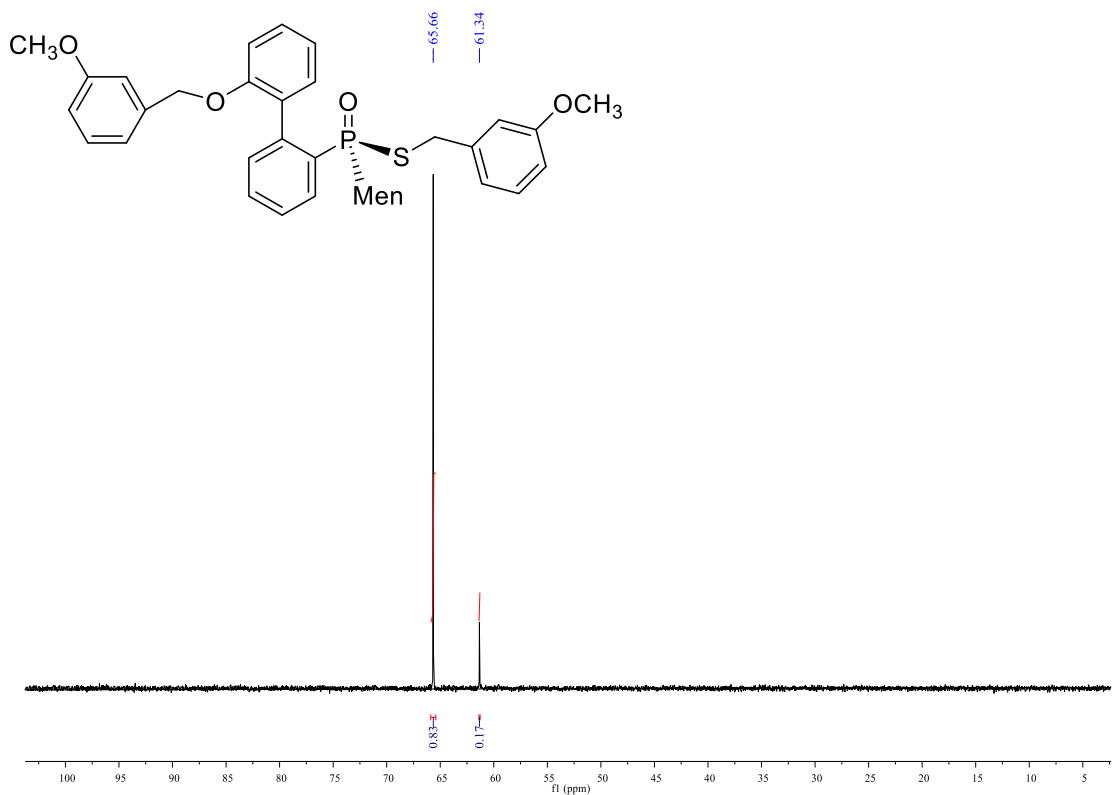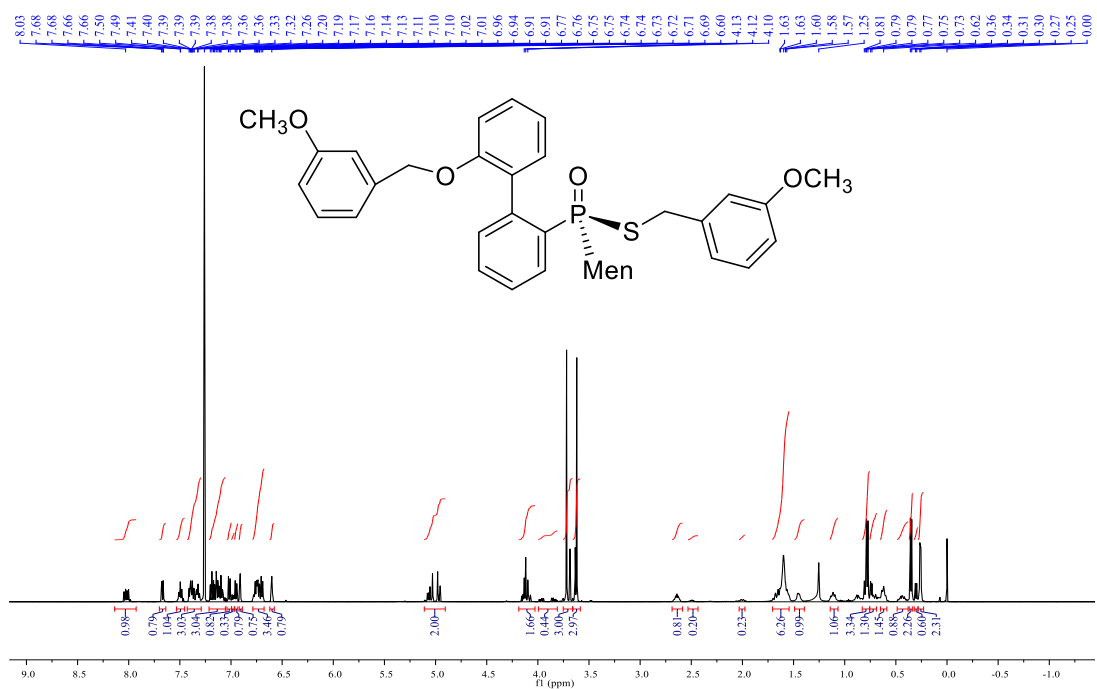

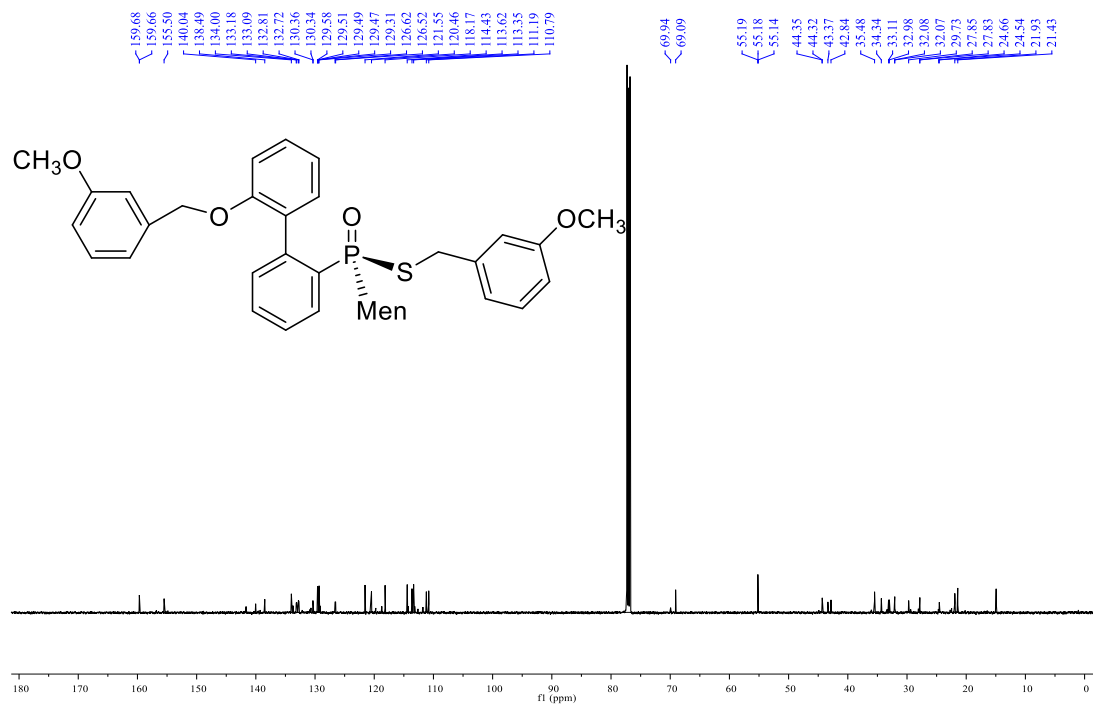

***S<sub>P</sub>*-S-(4-Chlorobenzyl)-(2'-((4-chlorobenzyl)oxy)-[1,1'-biphenyl]-2-yl)((-)-menthyl)phosphinotrioxide (*S<sub>P</sub>*-4I)**

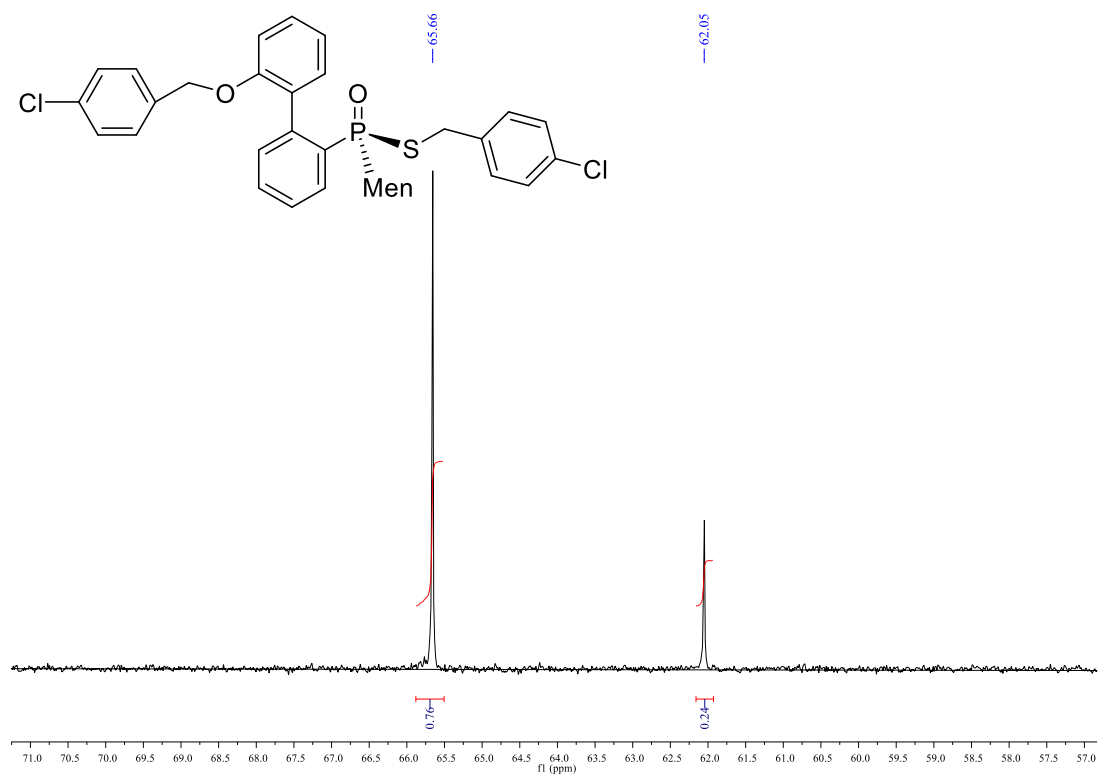

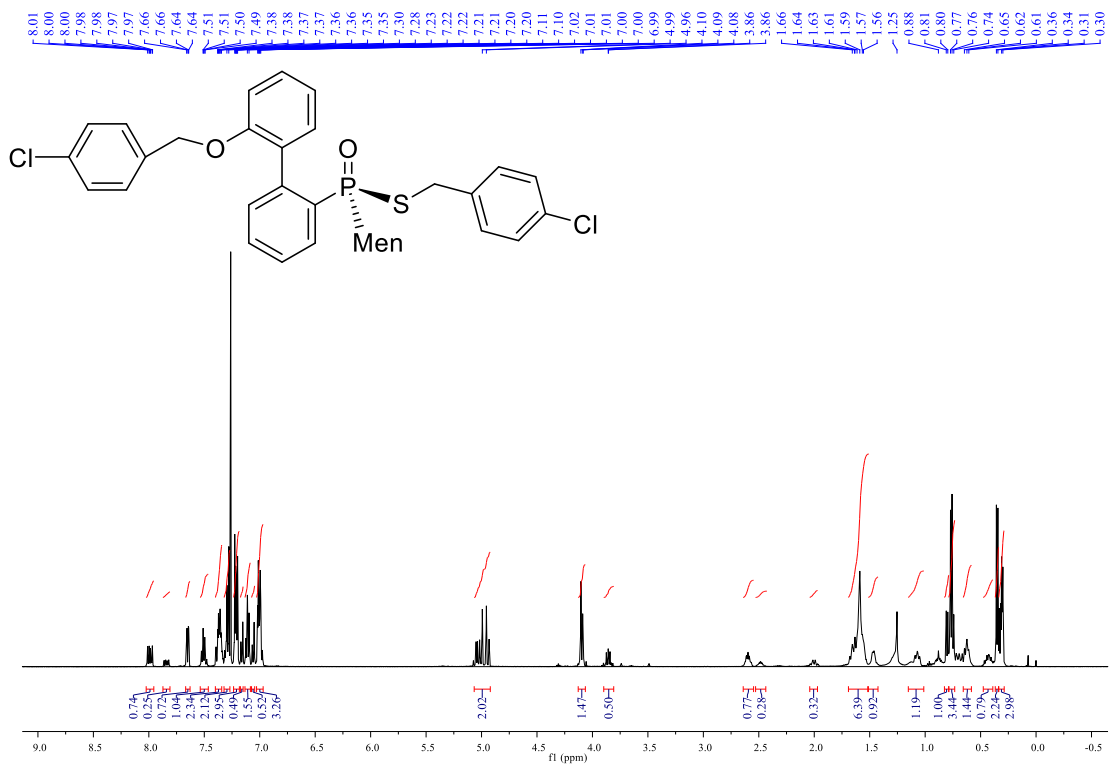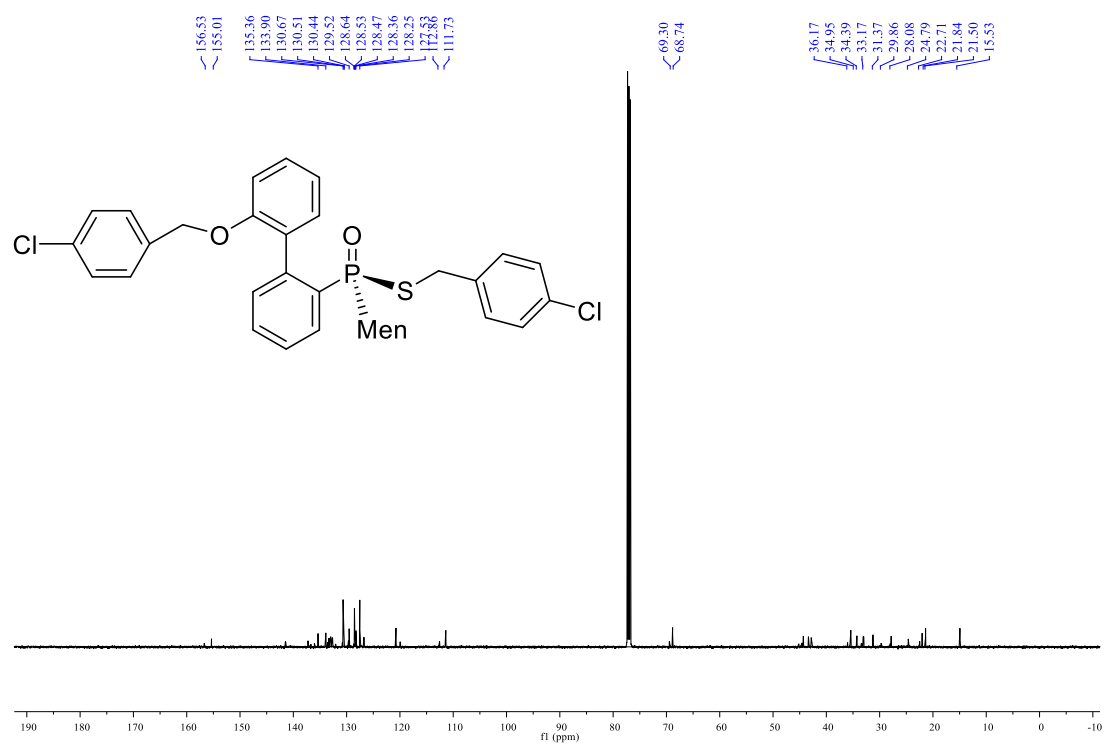

***R<sub>P</sub>*-6-((-)-Menthyl)dibenzo[*c,e*][1,2]-oxaphosphinine 6-oxide (*R<sub>P</sub>*-5)**

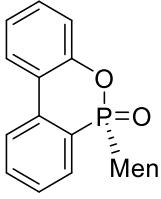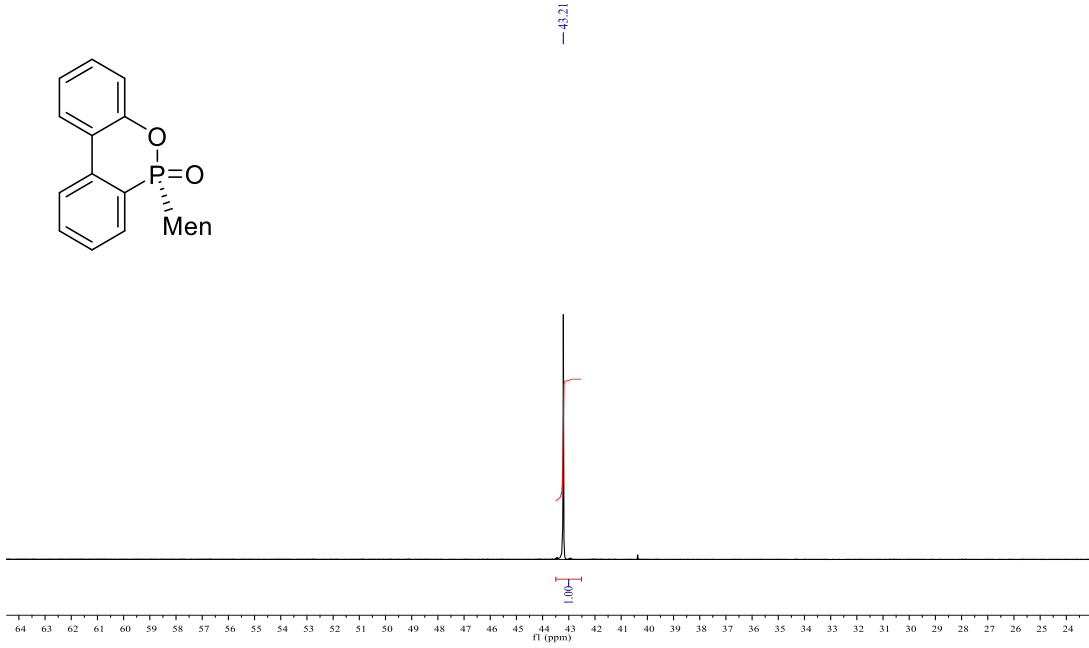

7.91  
7.89  
7.87  
7.86  
7.67  
7.50  
7.36  
7.27  
7.25  
7.24  
7.18  
7.16

2.64  
2.63  
2.61  
1.87  
1.85  
1.84  
1.74  
1.66  
1.64  
1.42  
1.10  
1.09  
1.08  
1.01  
1.00  
0.76  
0.75  
0.73

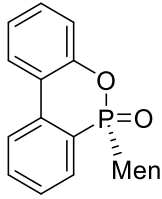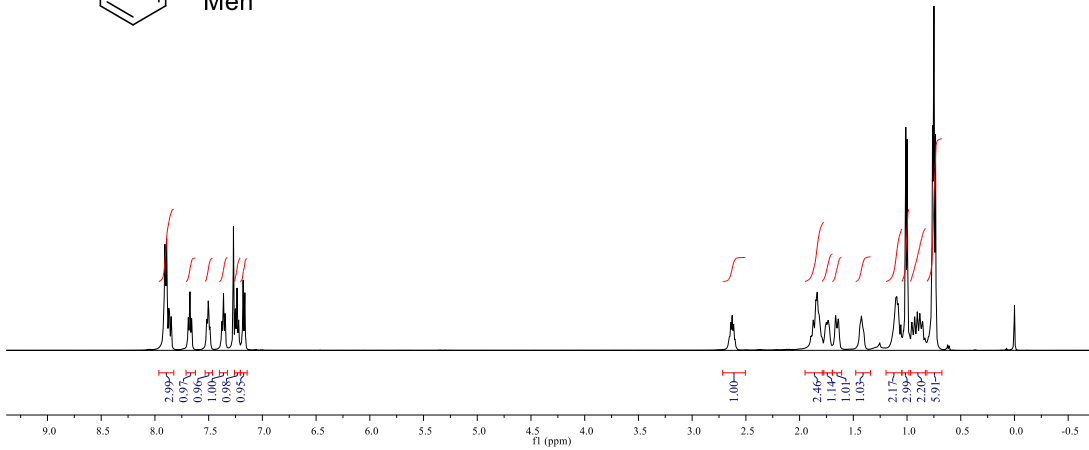



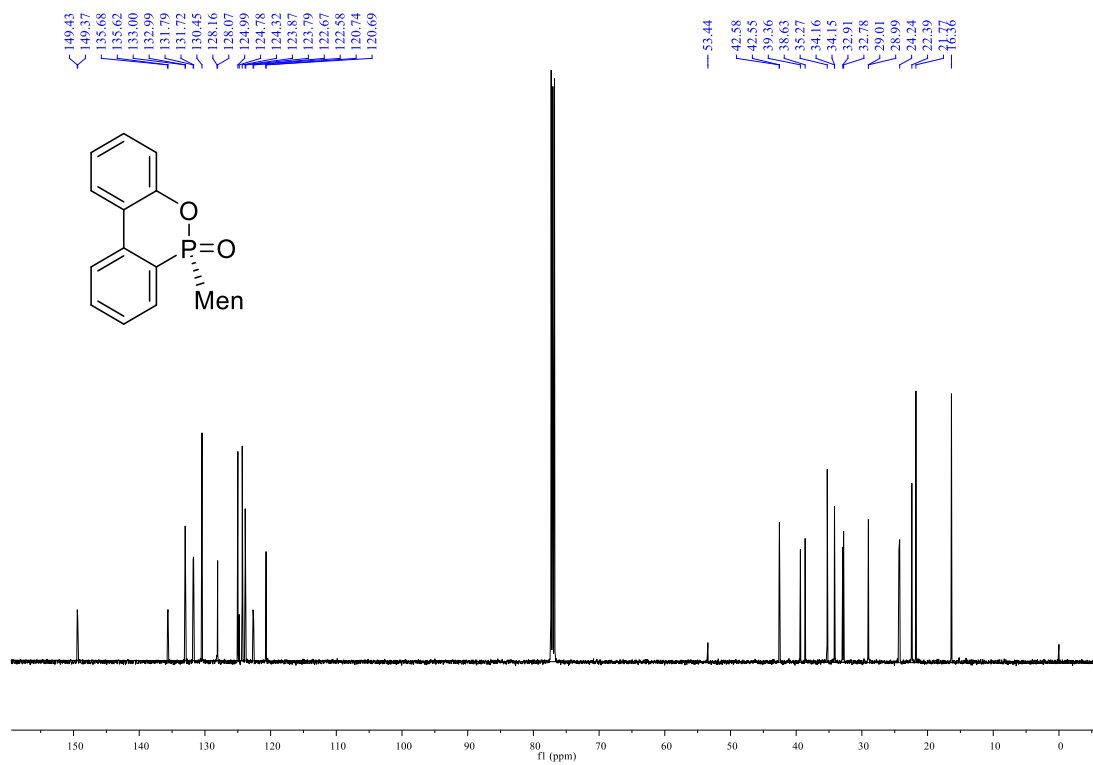

*Sp*-6-((-)-Menthyl)dibenzo[*c,e*][1,2]-oxaphosphinine 6-oxide (*Sp*-5')

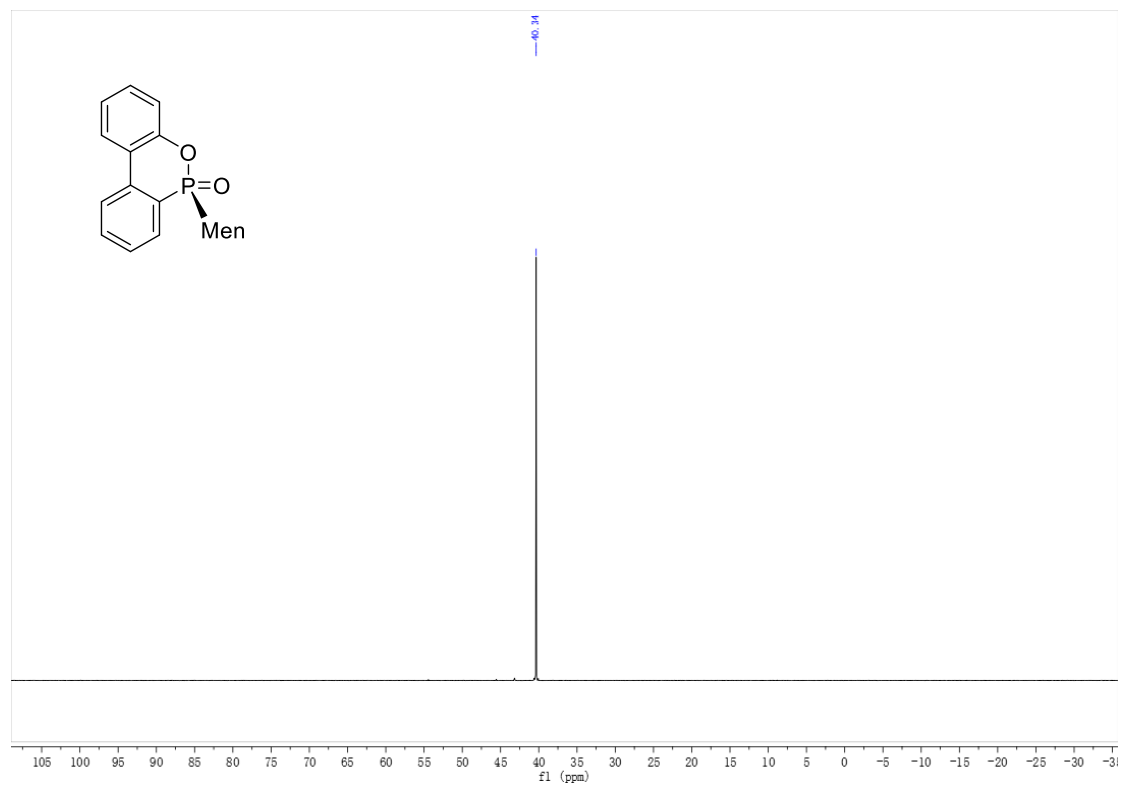

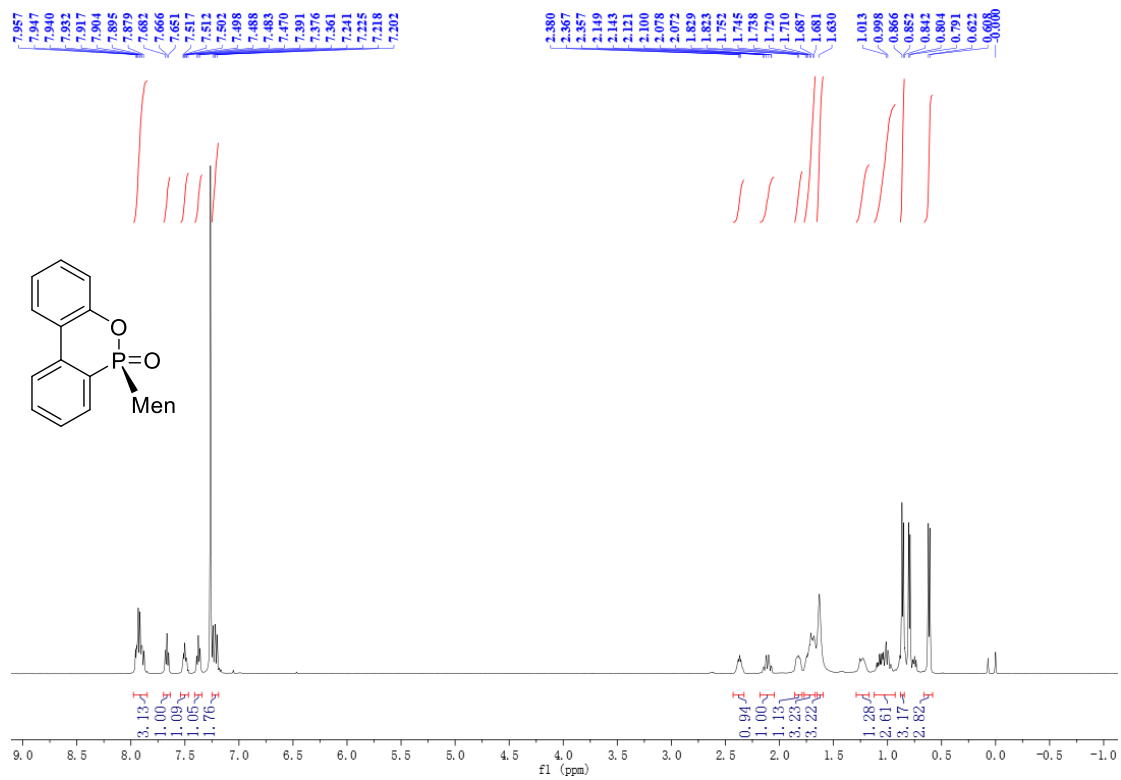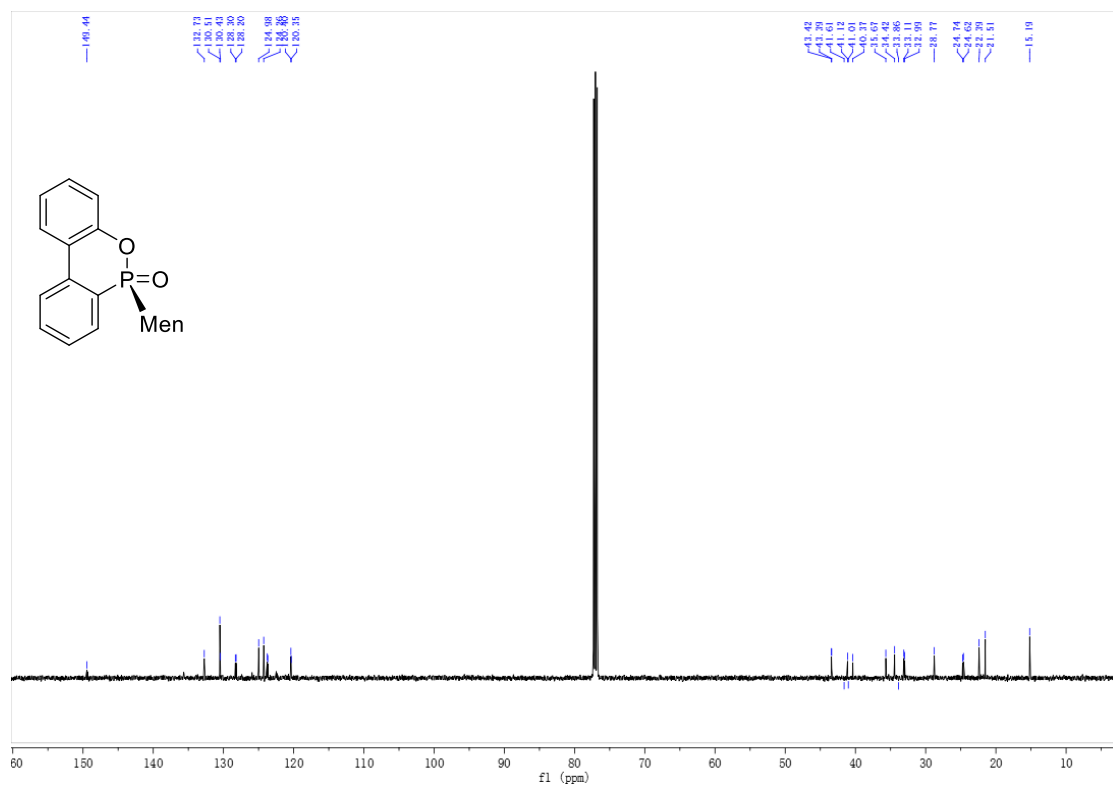

**S<sub>P</sub>-O-Benzyl-(2'-(benzyloxy)-[1,1'-biphenyl]-2-yl)((-)-menthyl)phosphinothioate (S<sub>P</sub>-6h)**

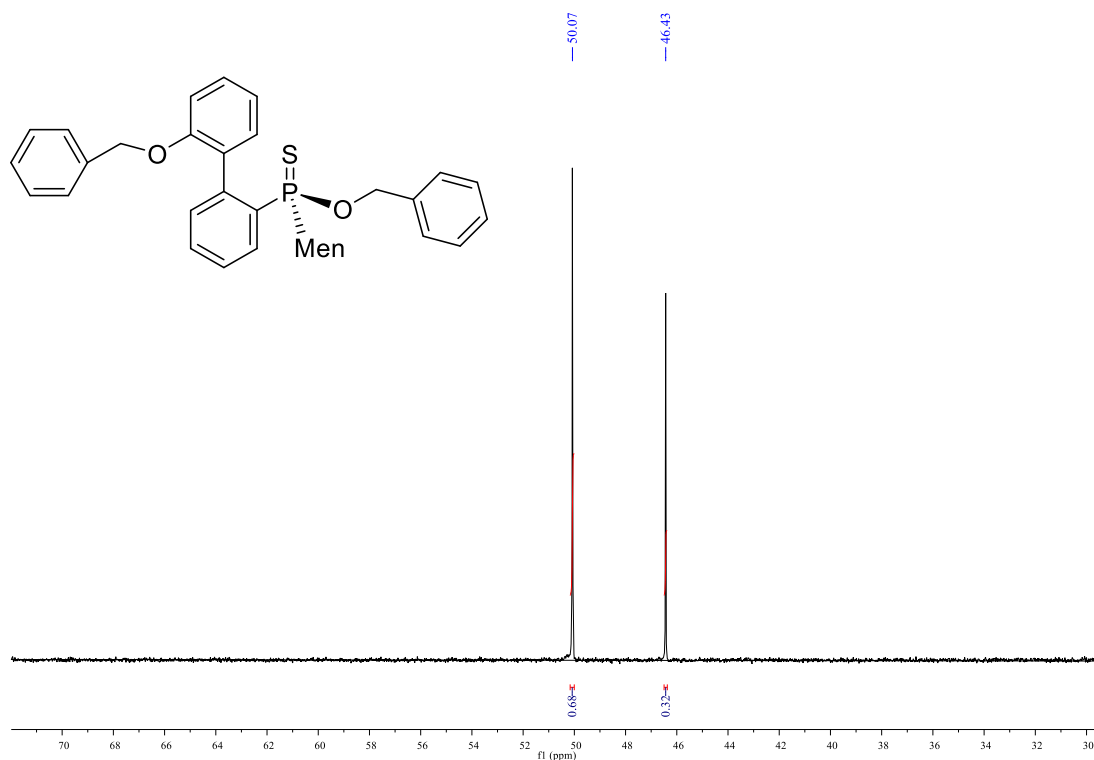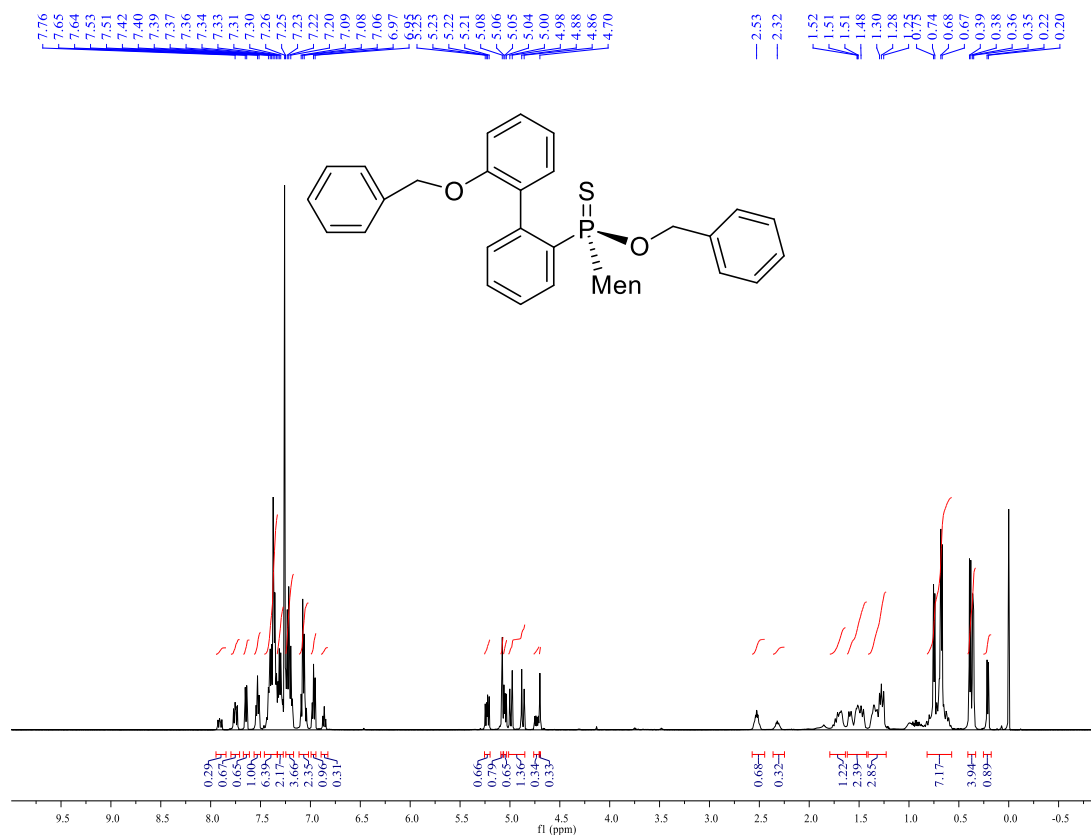

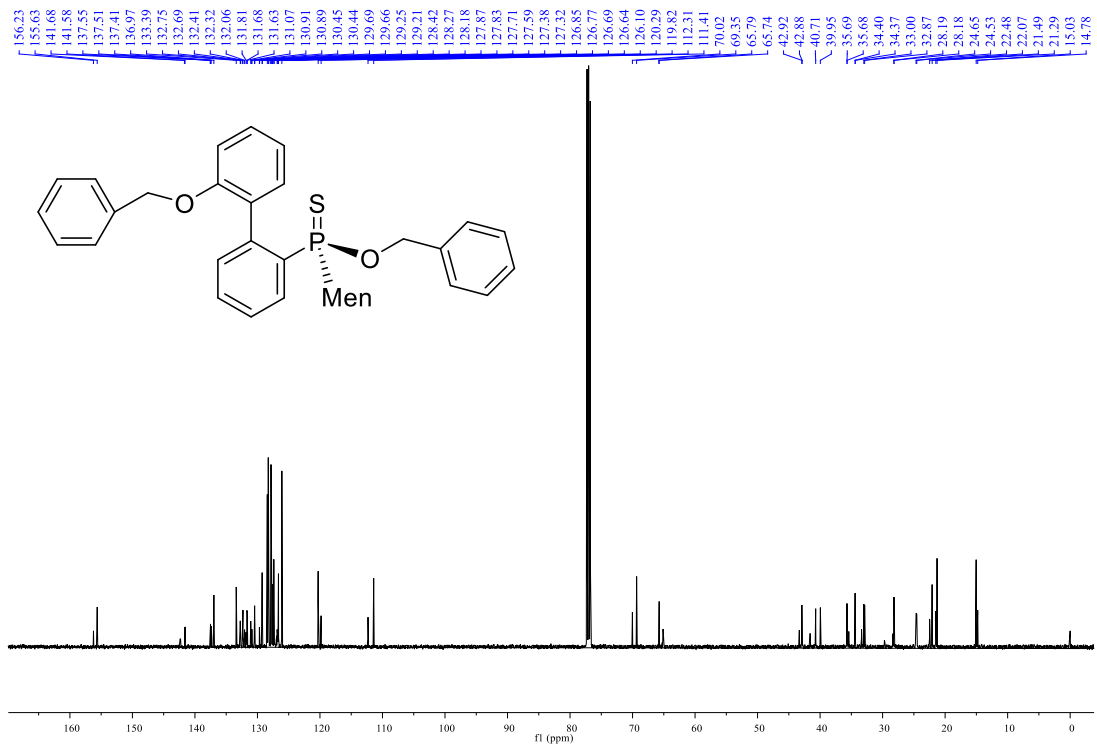

***S<sub>P</sub>*-*O*-(2-Methylbenzyl)-((-)-menthyl)(2'-((2-methylbenzyl)oxy)-[1,1'-biphenyl]-2-yl)phosphinothioate (*S<sub>P</sub>*-6i)**

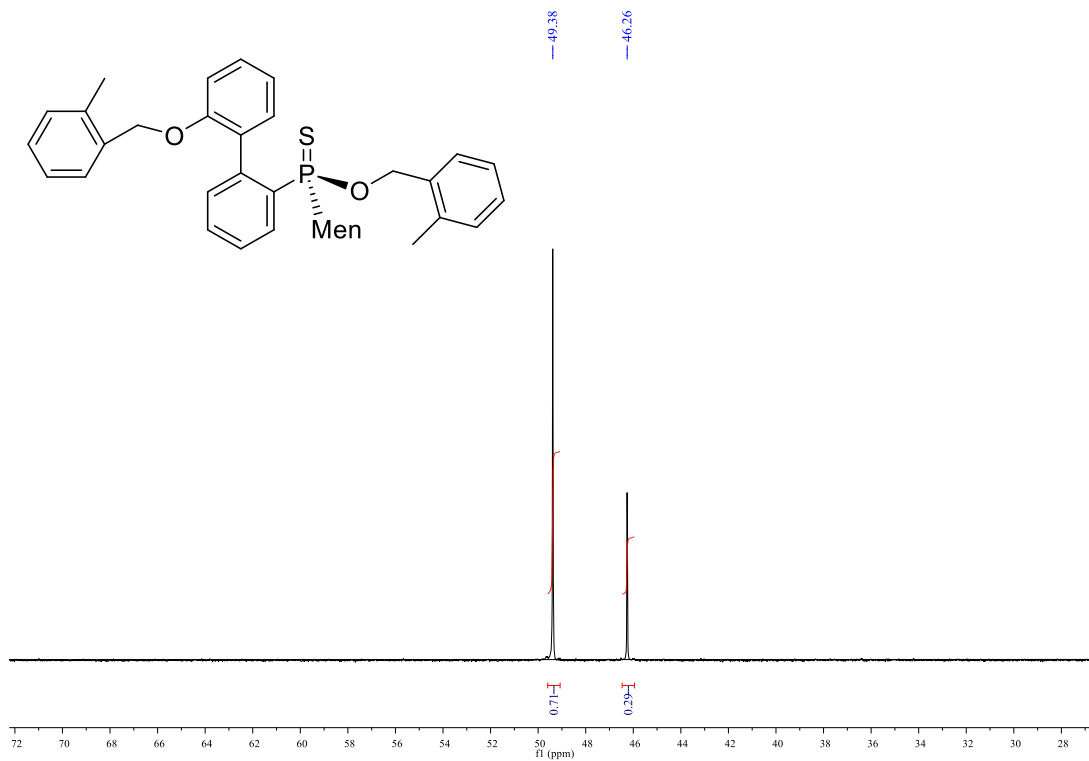

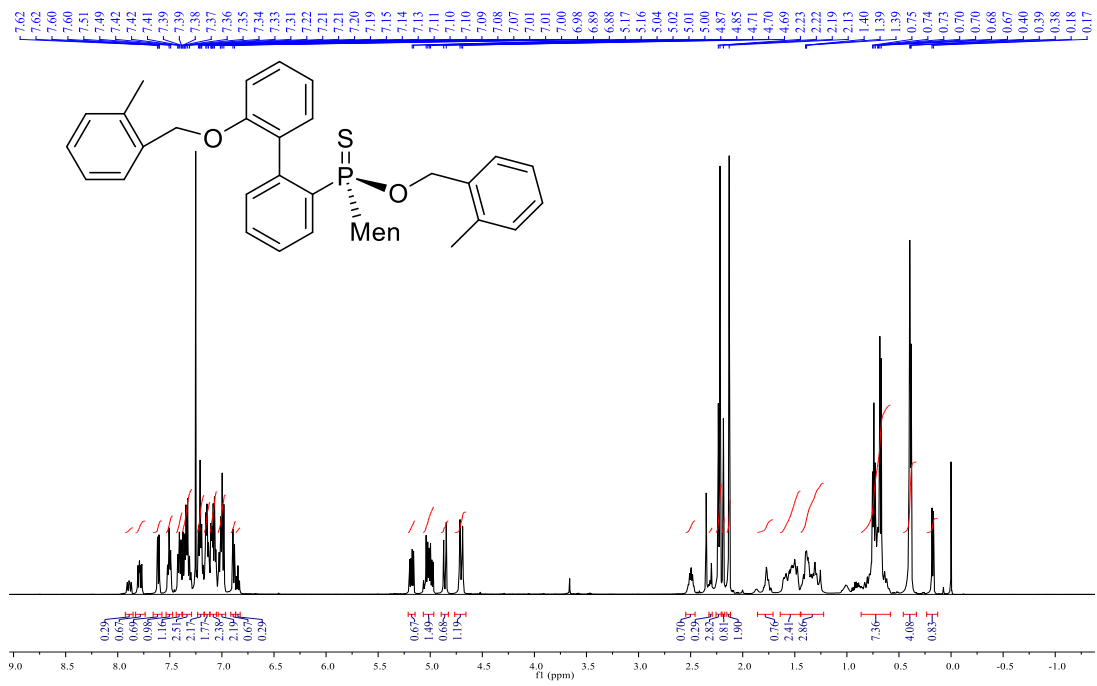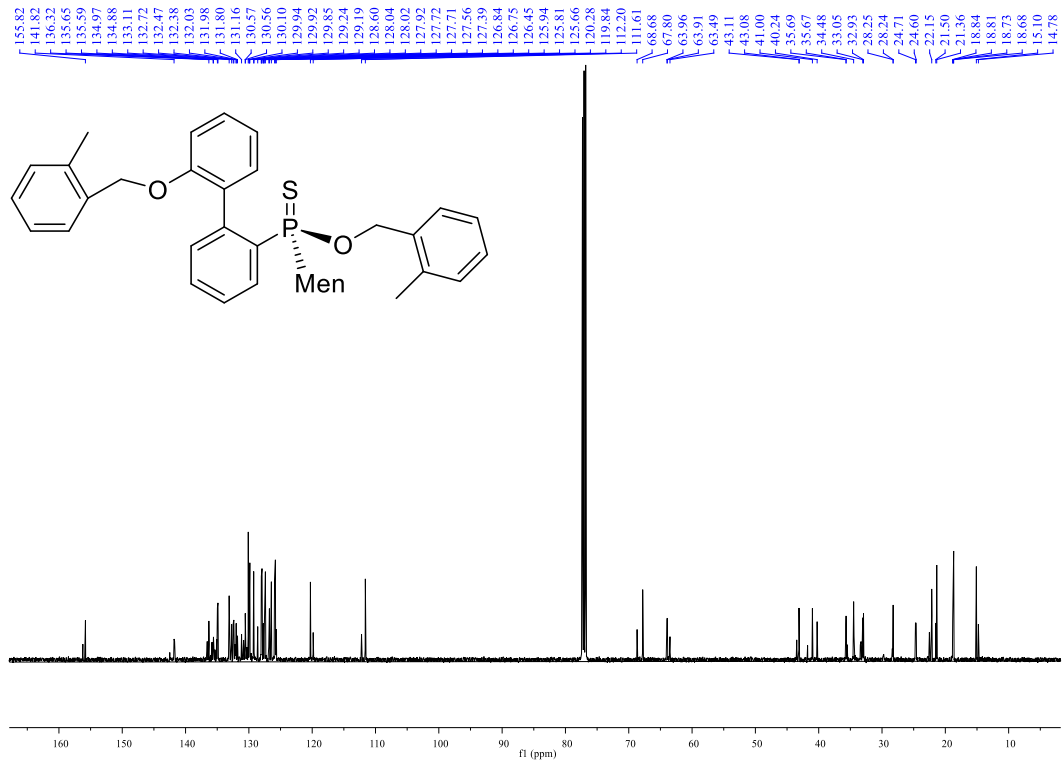

***S<sub>P</sub>*-*S*-Methyl-(2'-ethoxy-[1,1'-biphenyl]-2-yl)((-)-menthyl) phosphinothioate (*S<sub>P</sub>*-4a).**

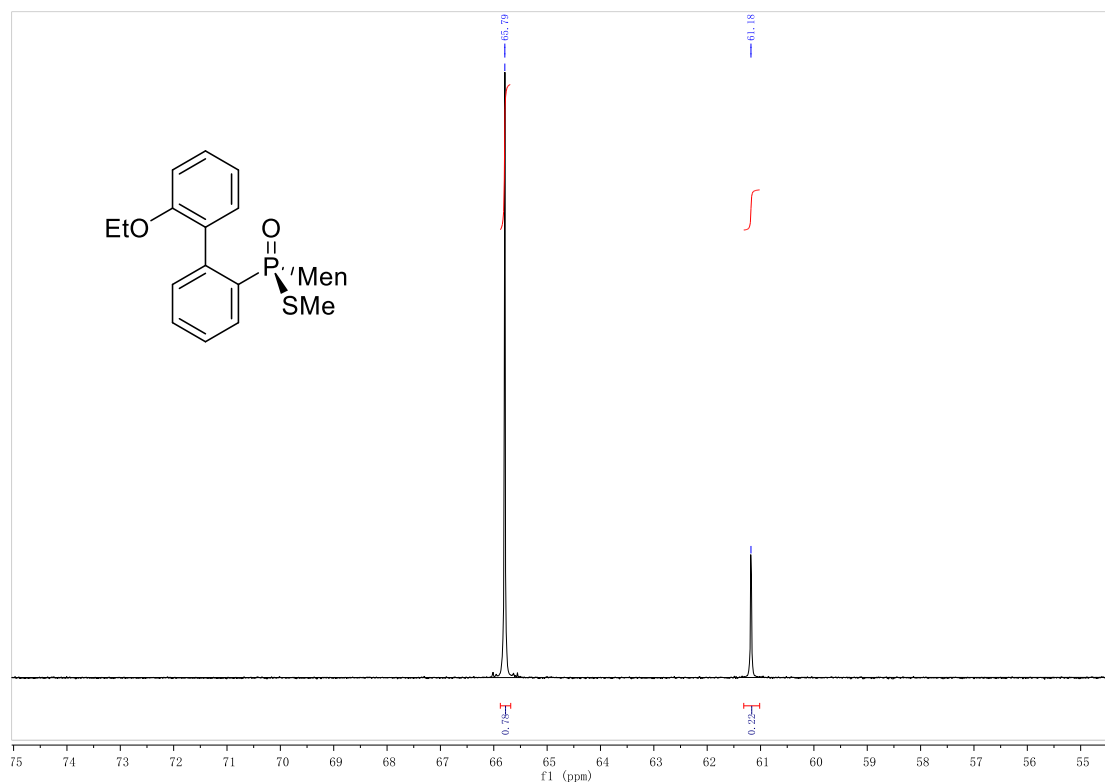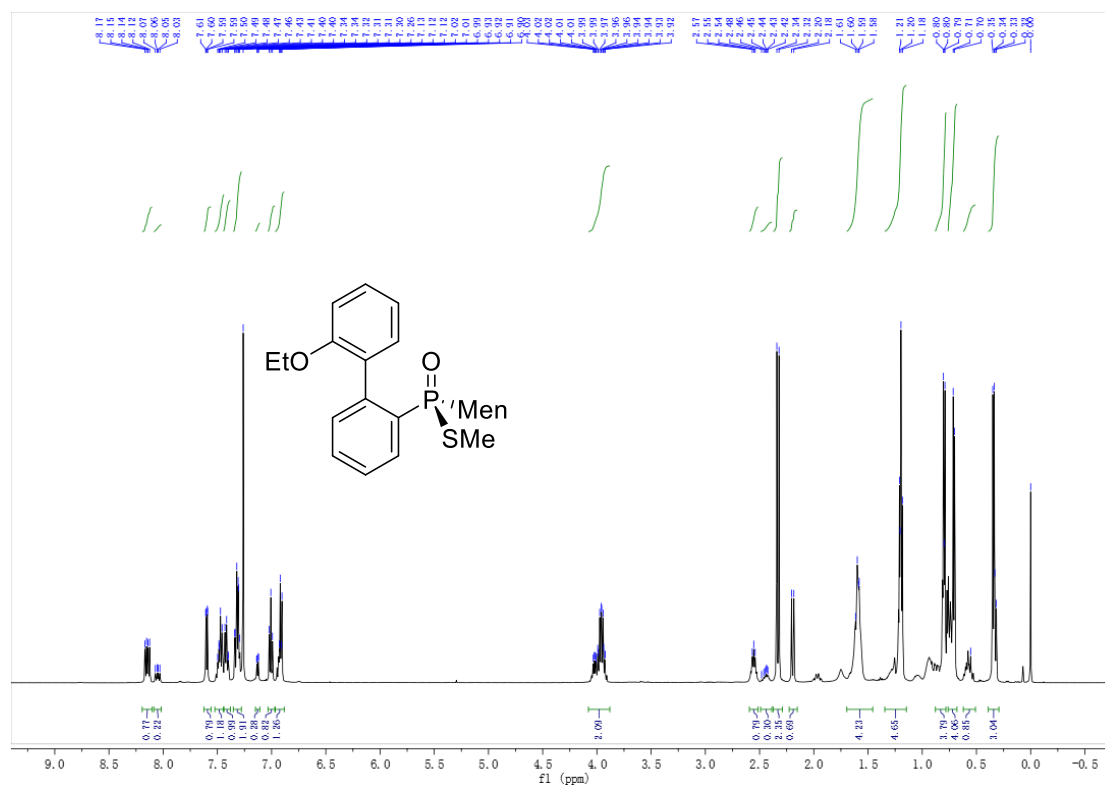

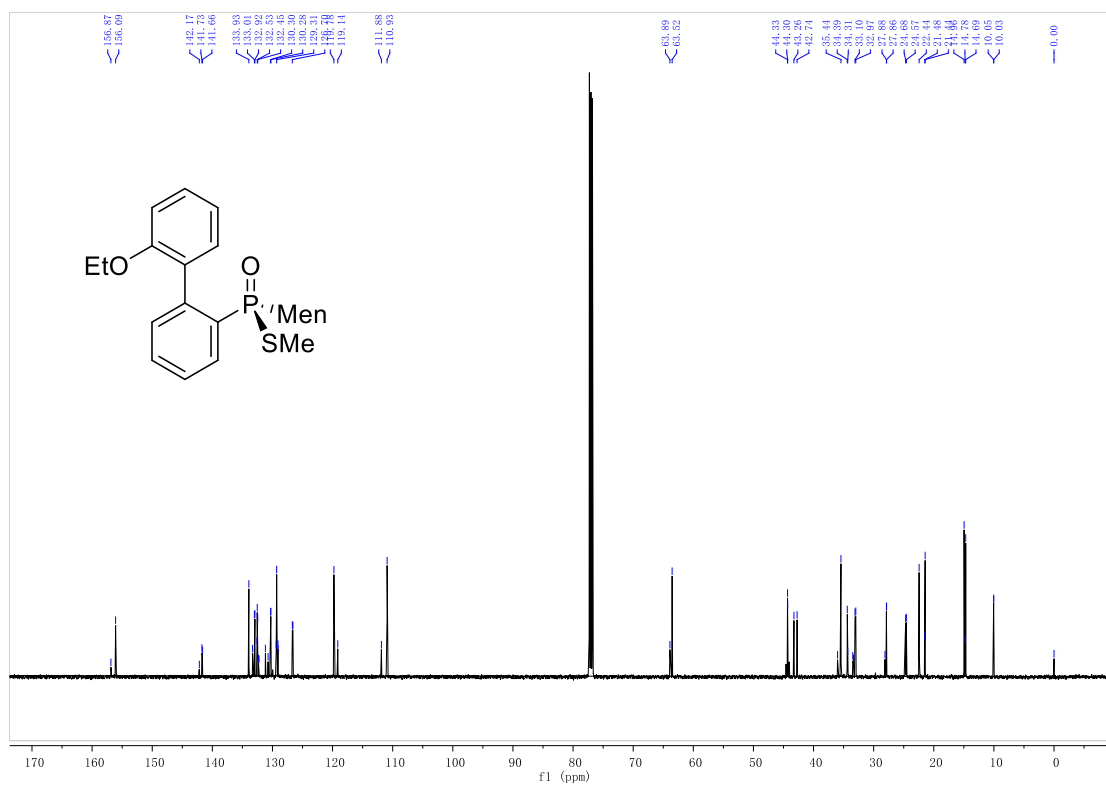

**$R_P$ -(2'-Ethoxy-[1,1'-biphenyl]-2-yl)(methyl)((-)-menthyl) phosphine oxide ( $R_P$ -7a)**

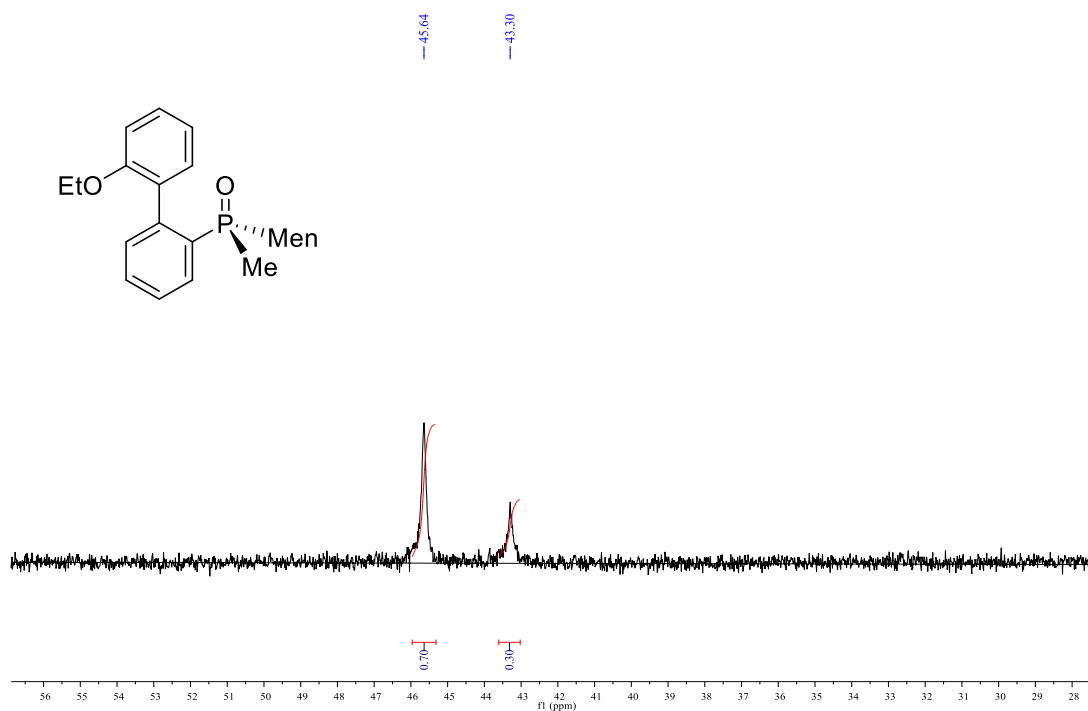

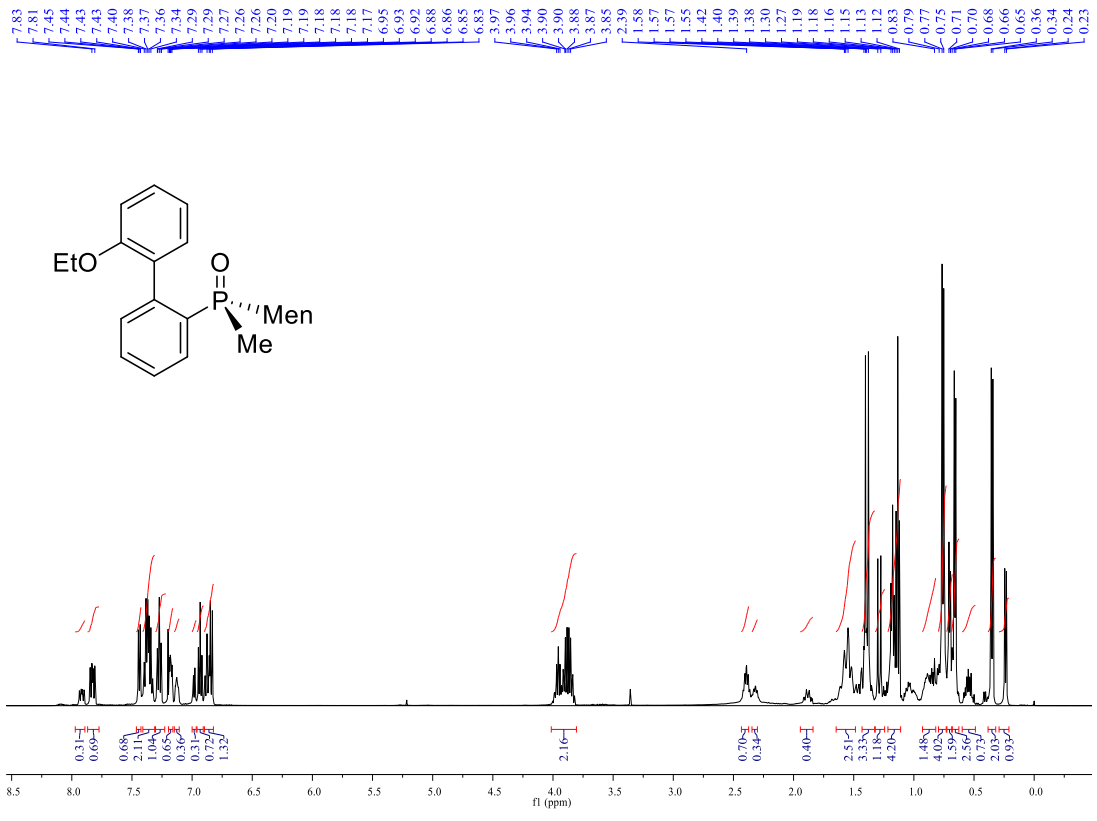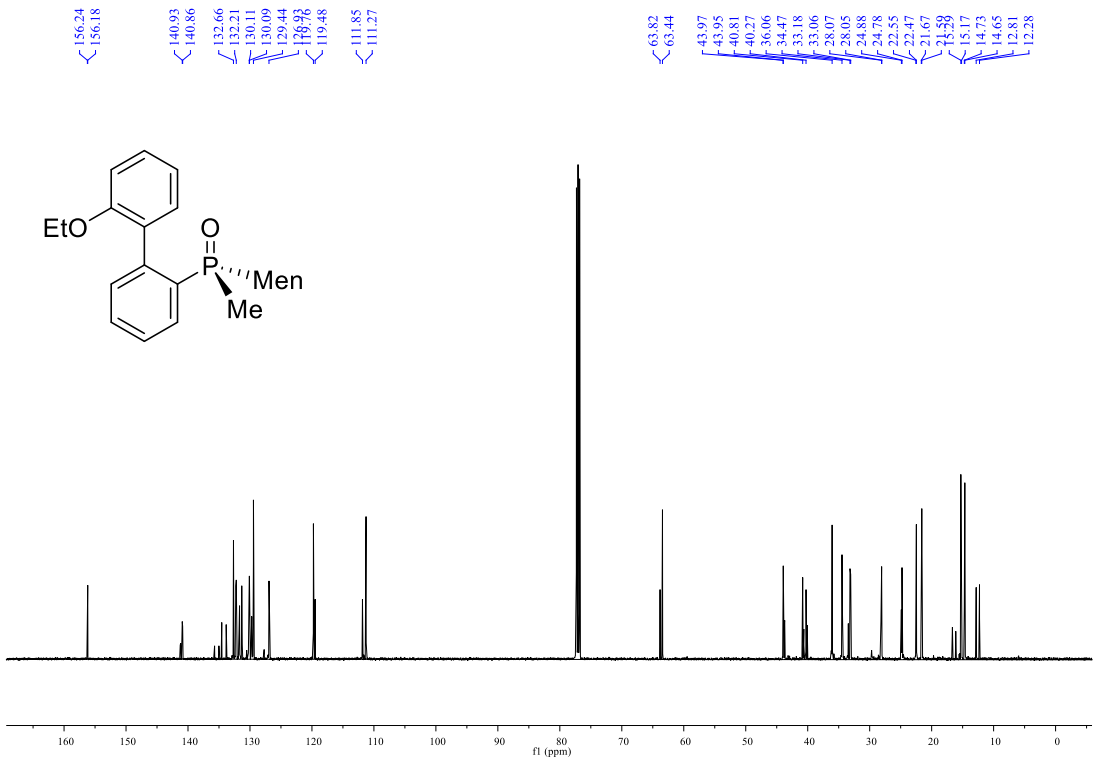



***R*<sub>P</sub>-(2'-Ethoxy-[1,1'-biphenyl]-2-yl)(ethyl)((-)-menthyl) phosphine oxide (*R*<sub>P</sub>-7b)**

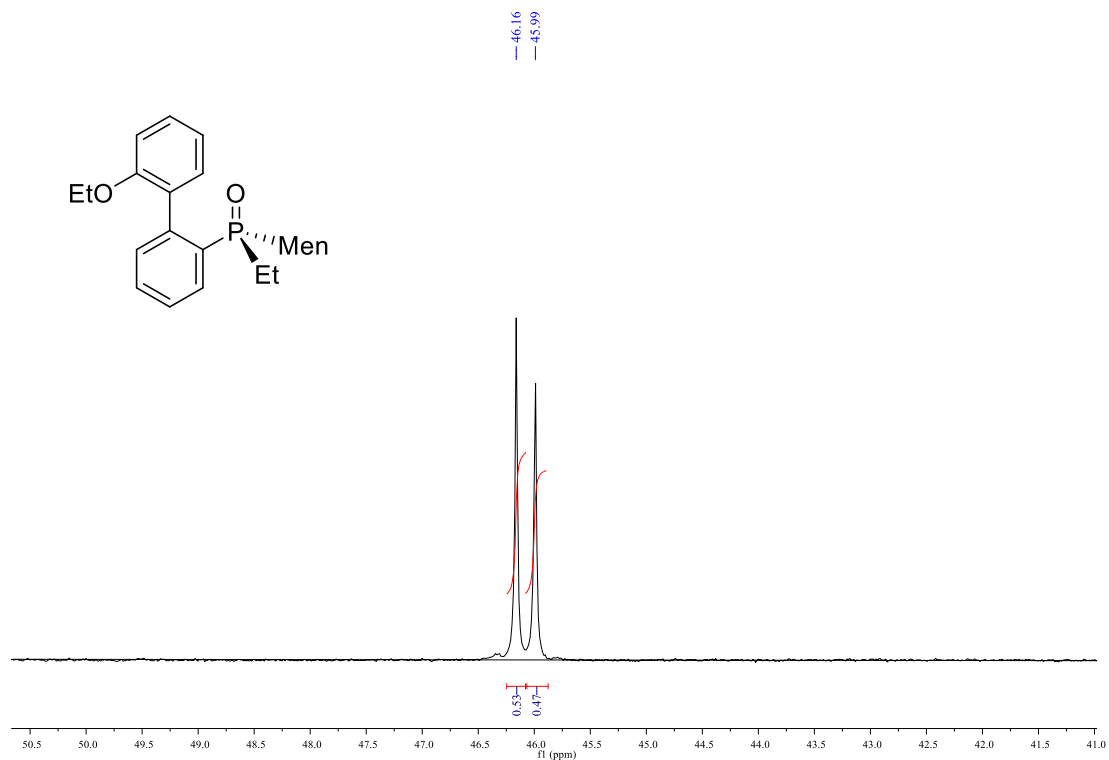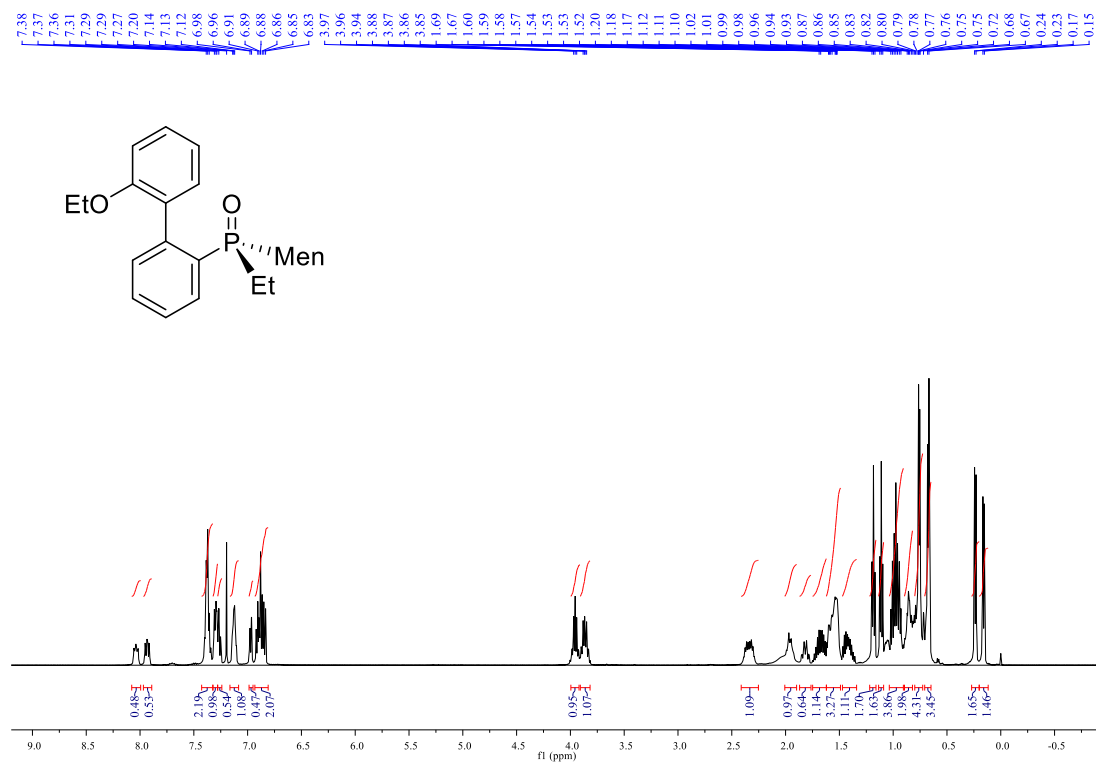

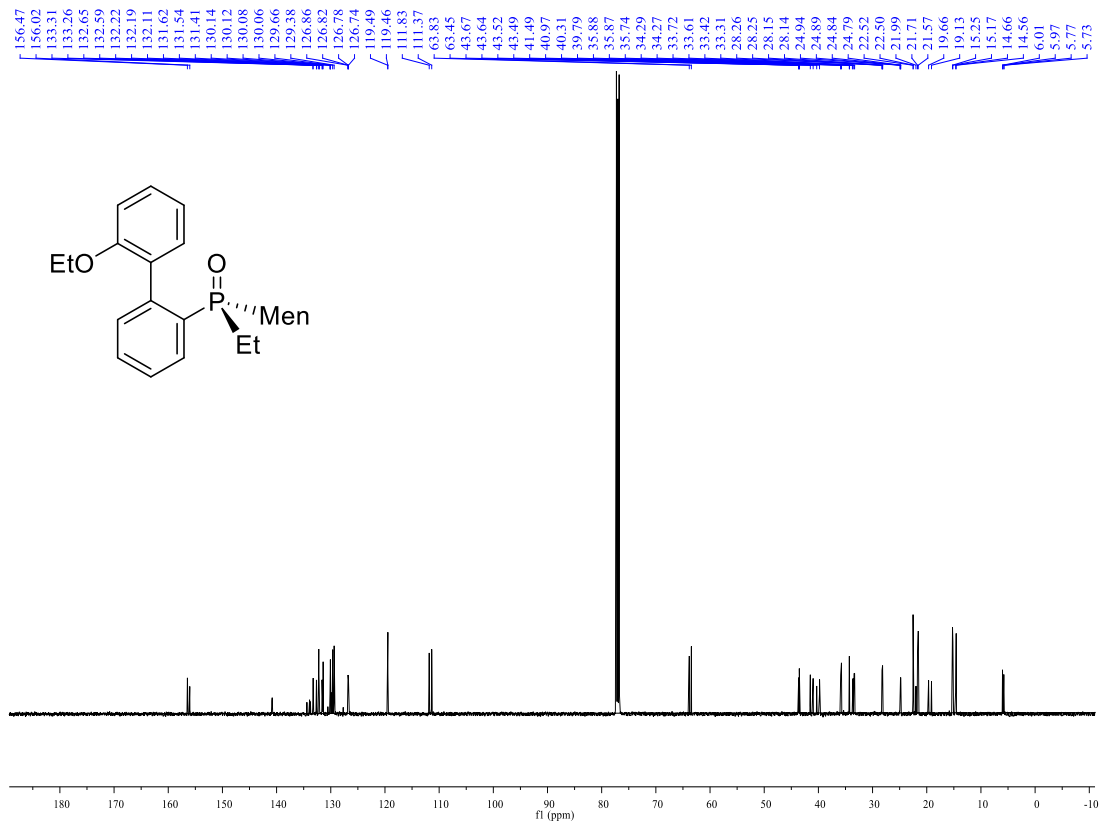

***R<sub>P</sub>*-Butyl (2'-ethoxy-[1,1'-biphenyl]-2-yl)((-)-menthyl) phosphine oxide (*R<sub>P</sub>*-7c)**

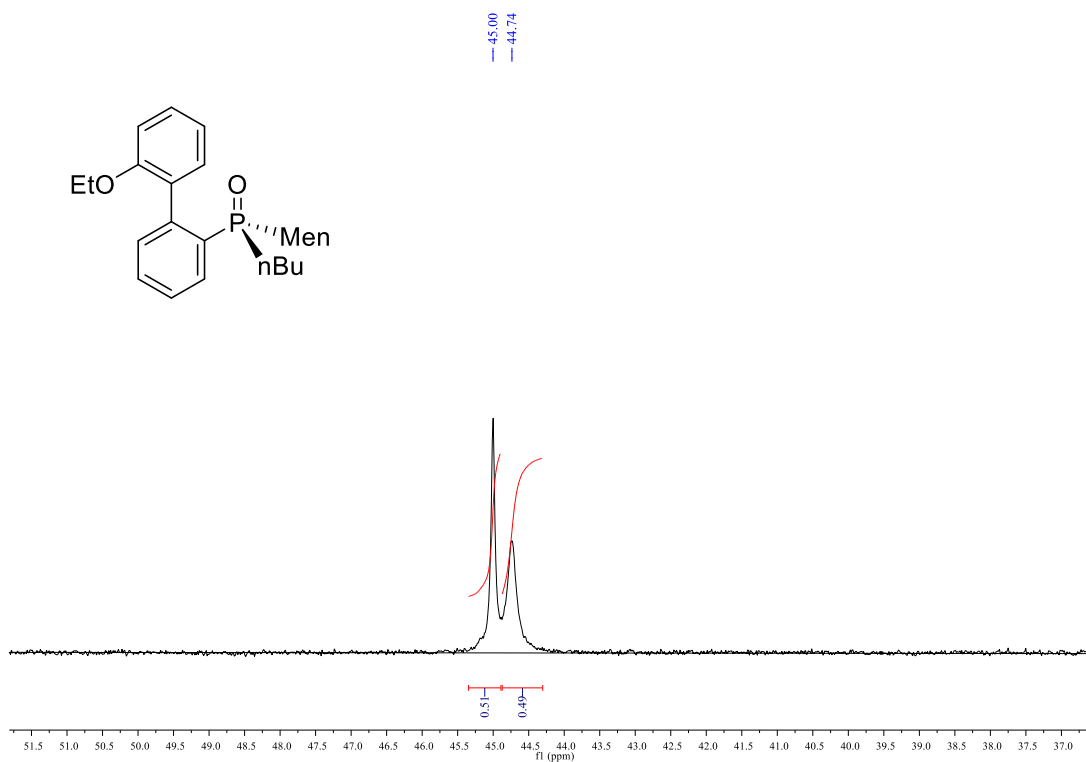

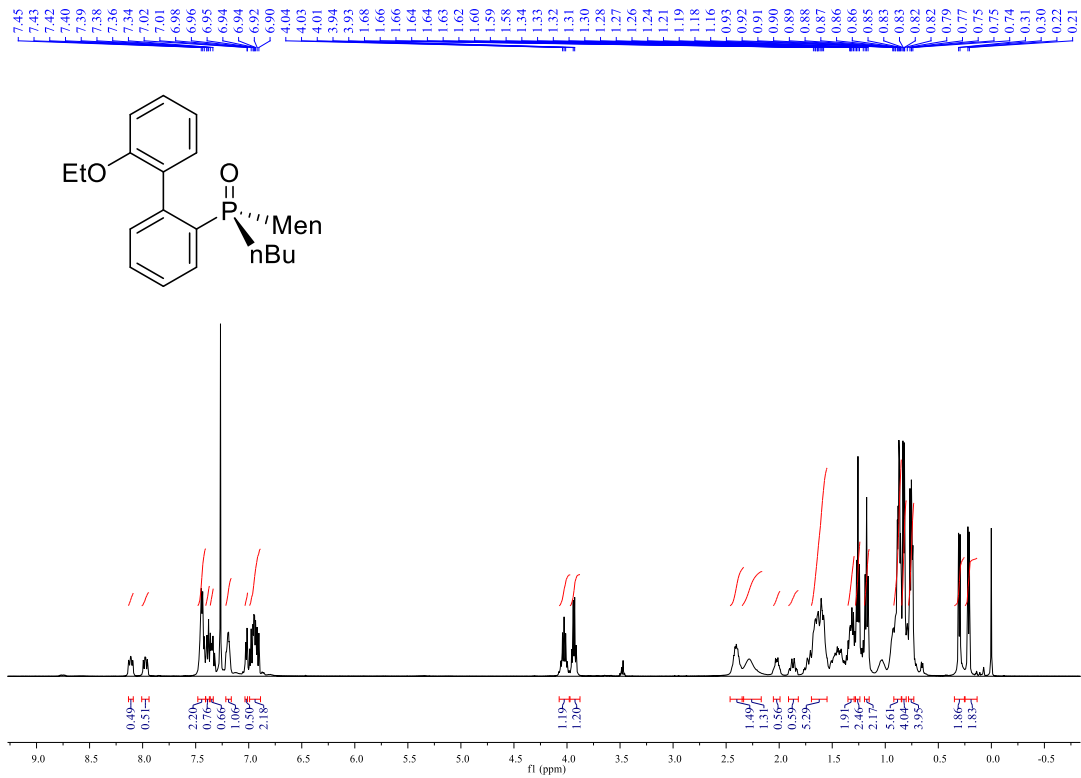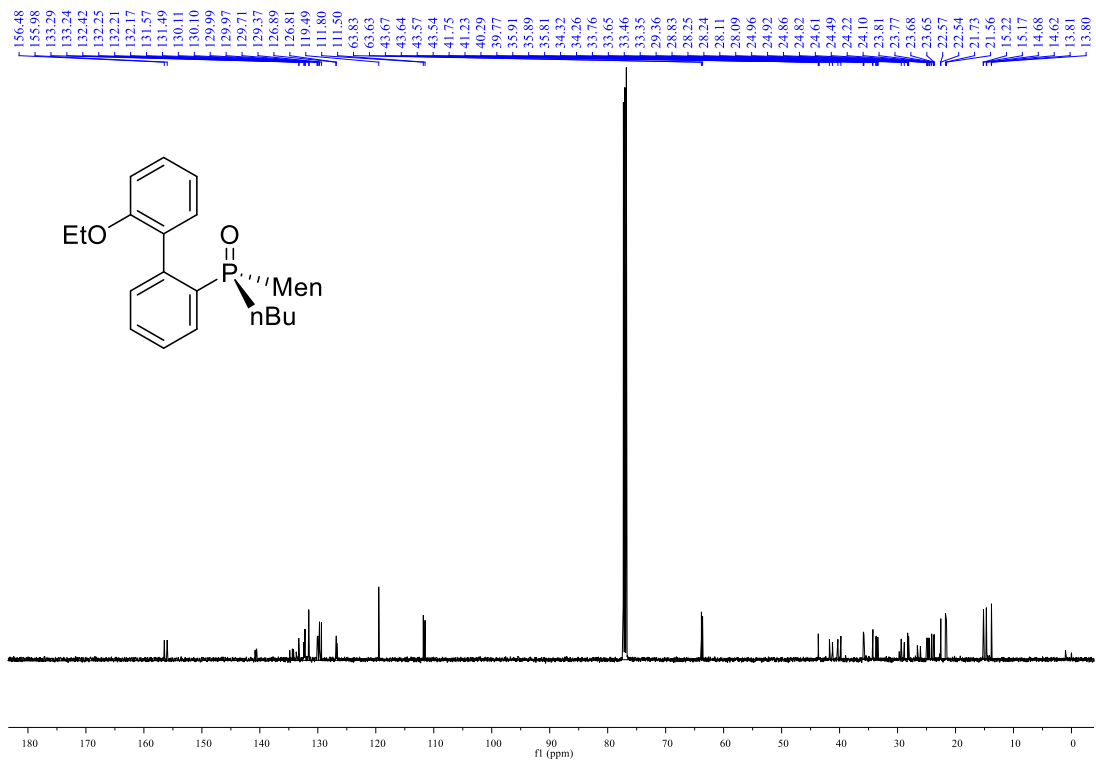

***R*<sub>P</sub>-(2'-Ethoxy-[1,1'-biphenyl]-2-yl)(isobutyl)((-)-menthyl) phosphine oxide (*R*<sub>P</sub>-7d)**

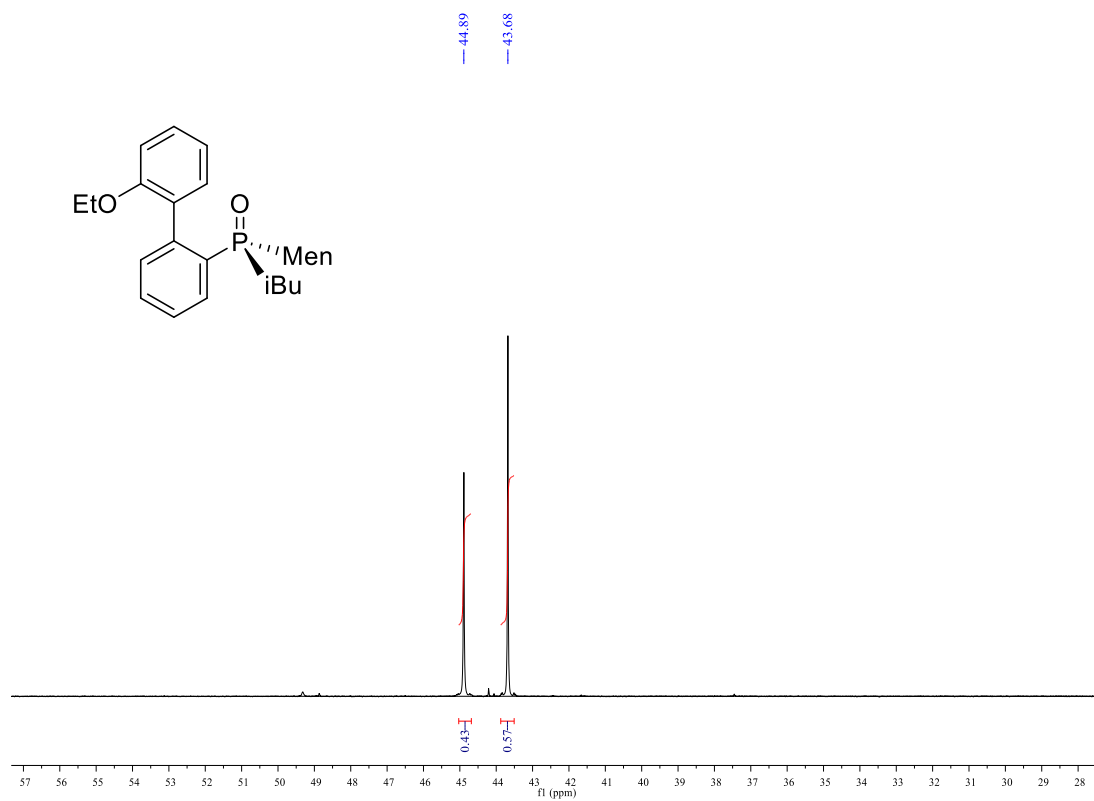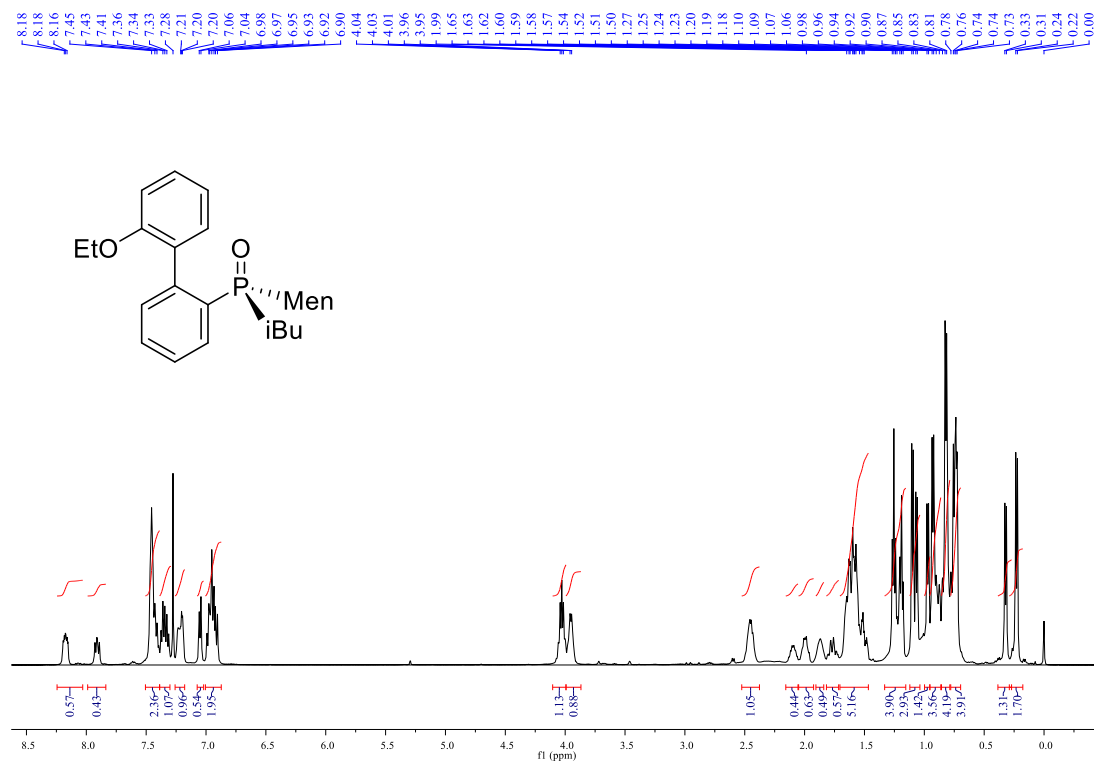

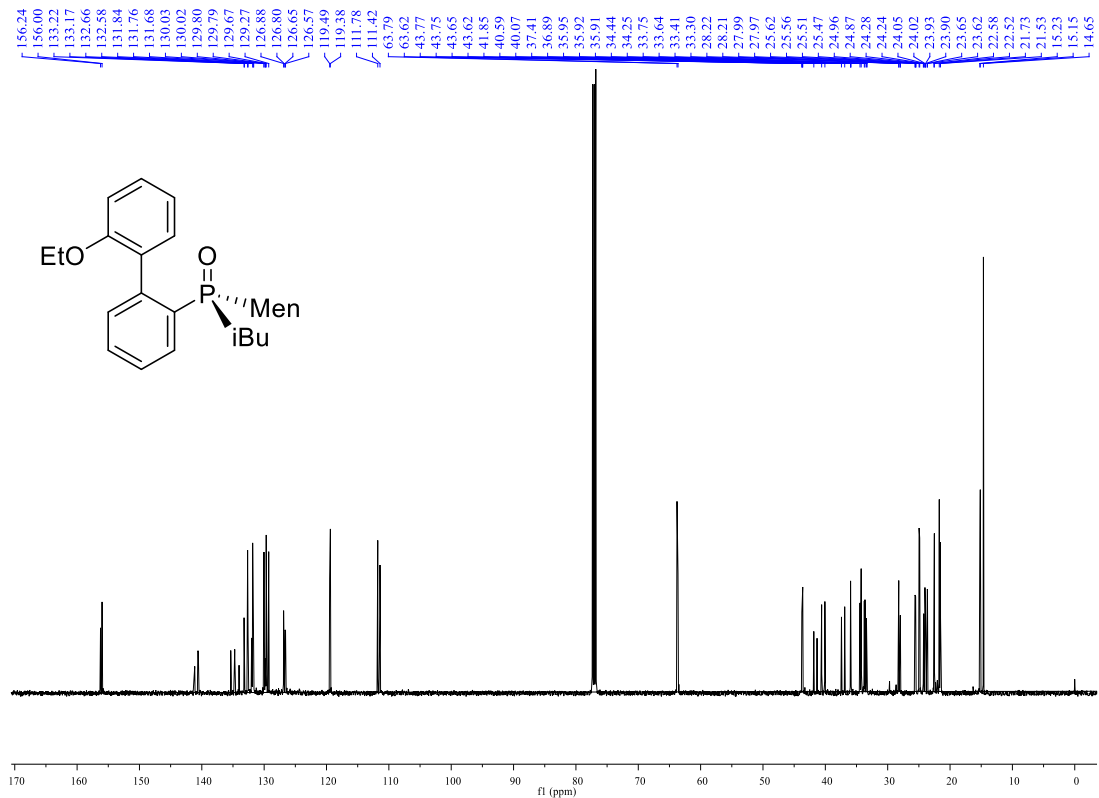

$R_P$ -Allyl (2'-ethoxy-[1,1'-biphenyl]-2-yl) ((-)-menthyl) phosphine oxide ( $R_P$ -7e)

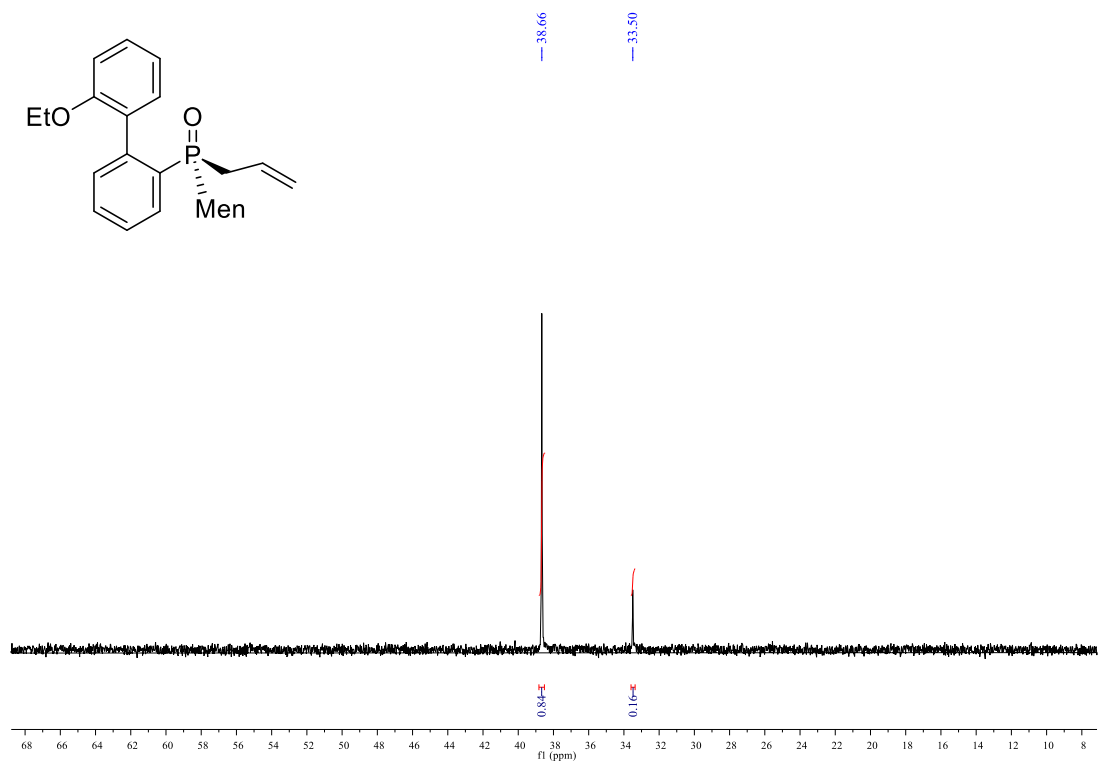

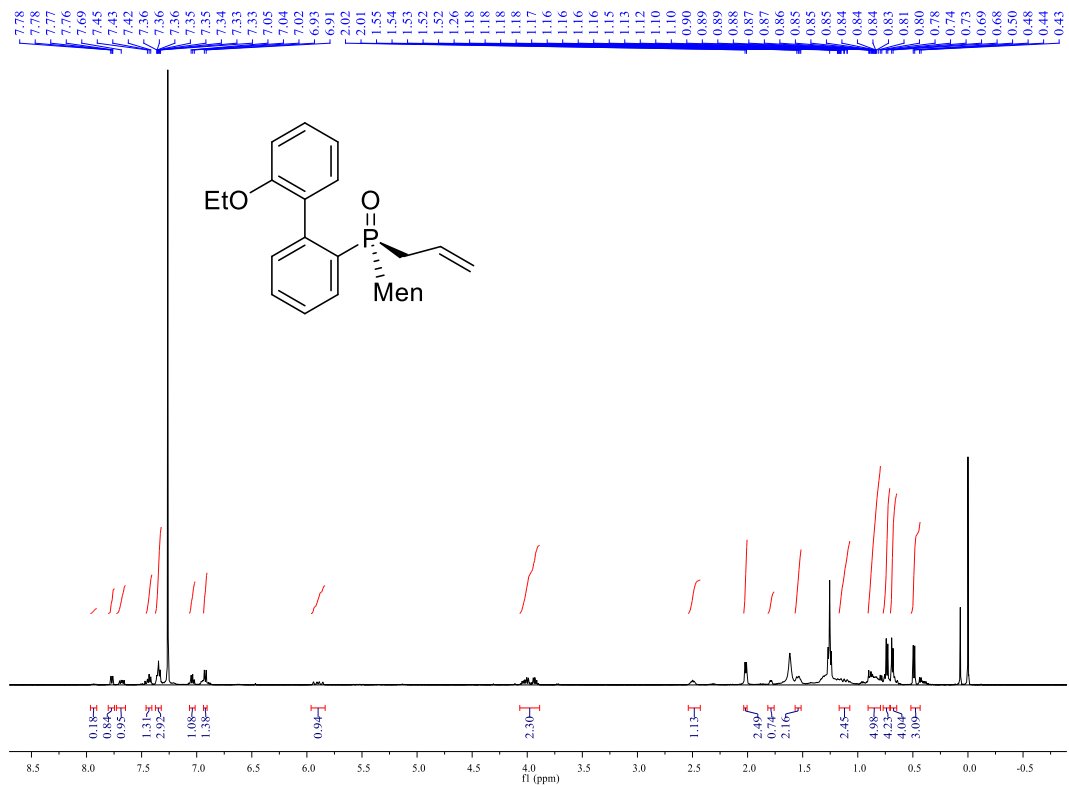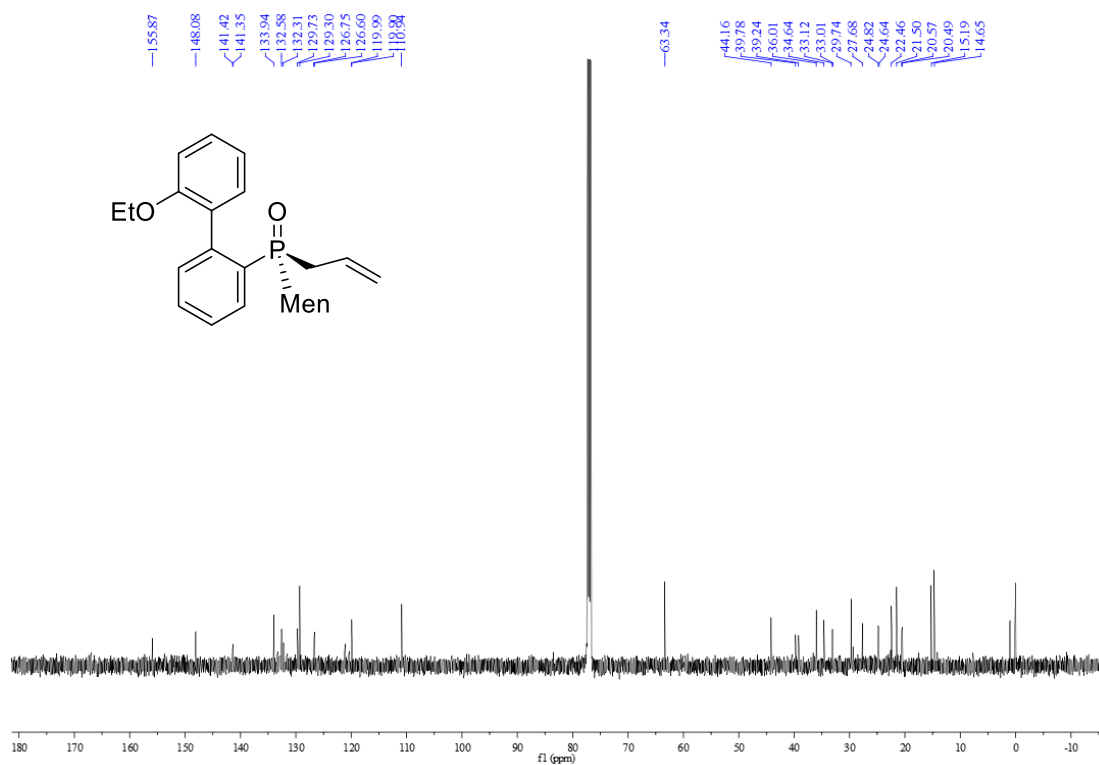

***R<sub>P</sub>*-Benzyl (2'-ethoxy-[1,1'-biphenyl]-2-yl)((-)-menthyl) phosphine oxide (*R<sub>P</sub>*-7f)**

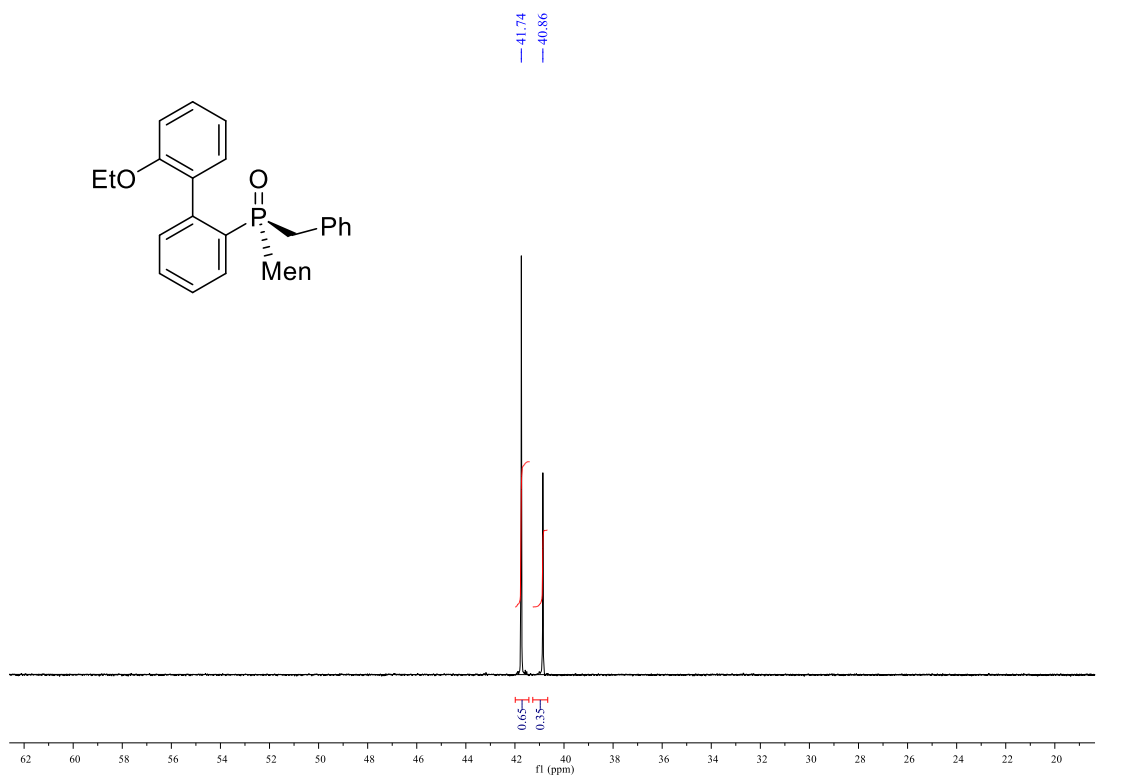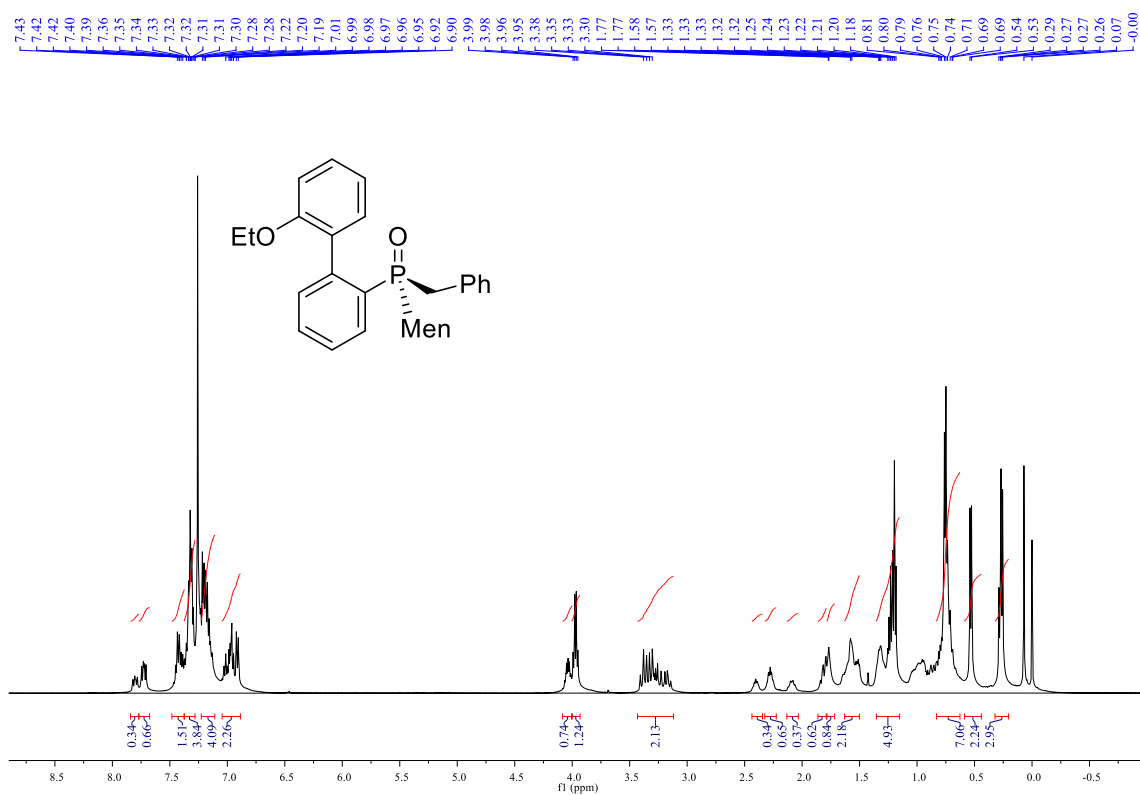

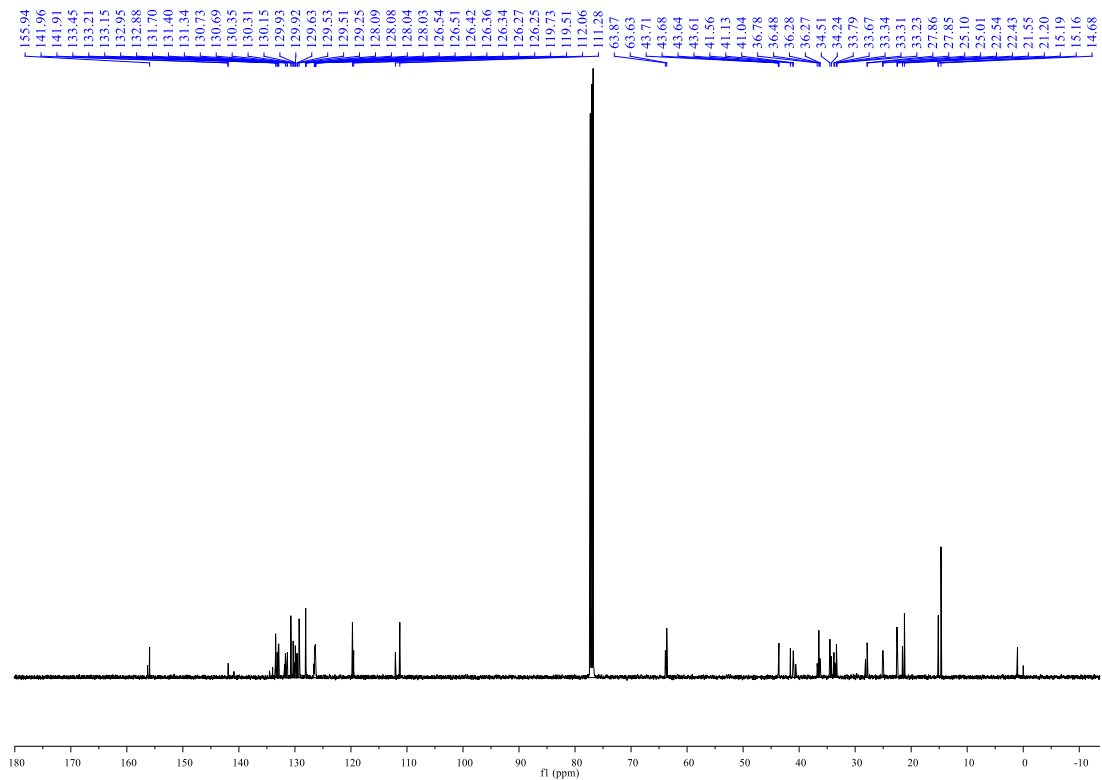

***R<sub>P</sub>*-(2'-Ethoxy-[1,1'-biphenyl]-2-yl)((-)-menthyl)(2-methylbenzyl) phosphine oxide (*R<sub>P</sub>*-7g)**

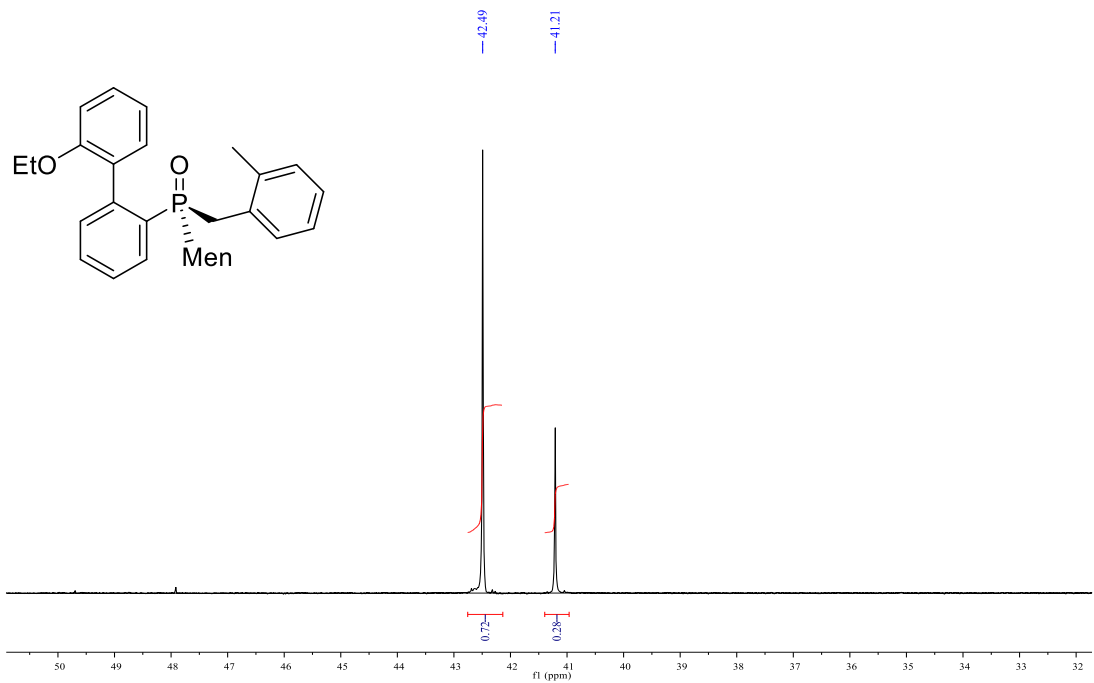



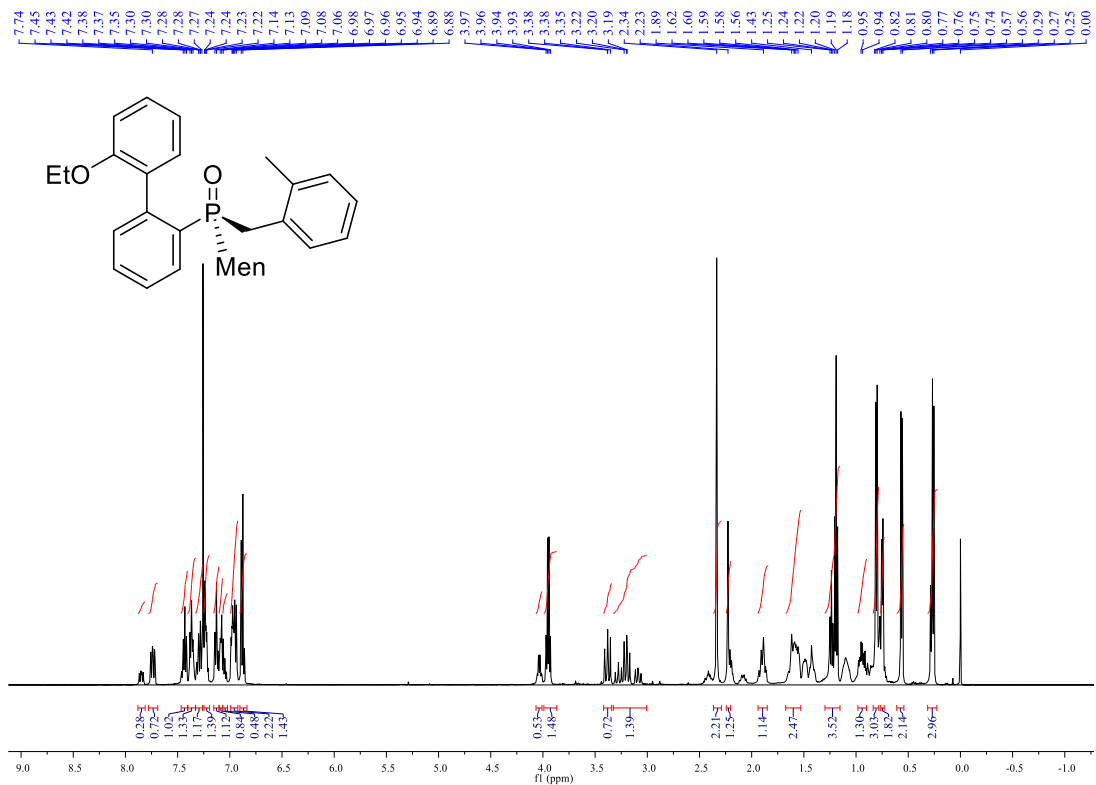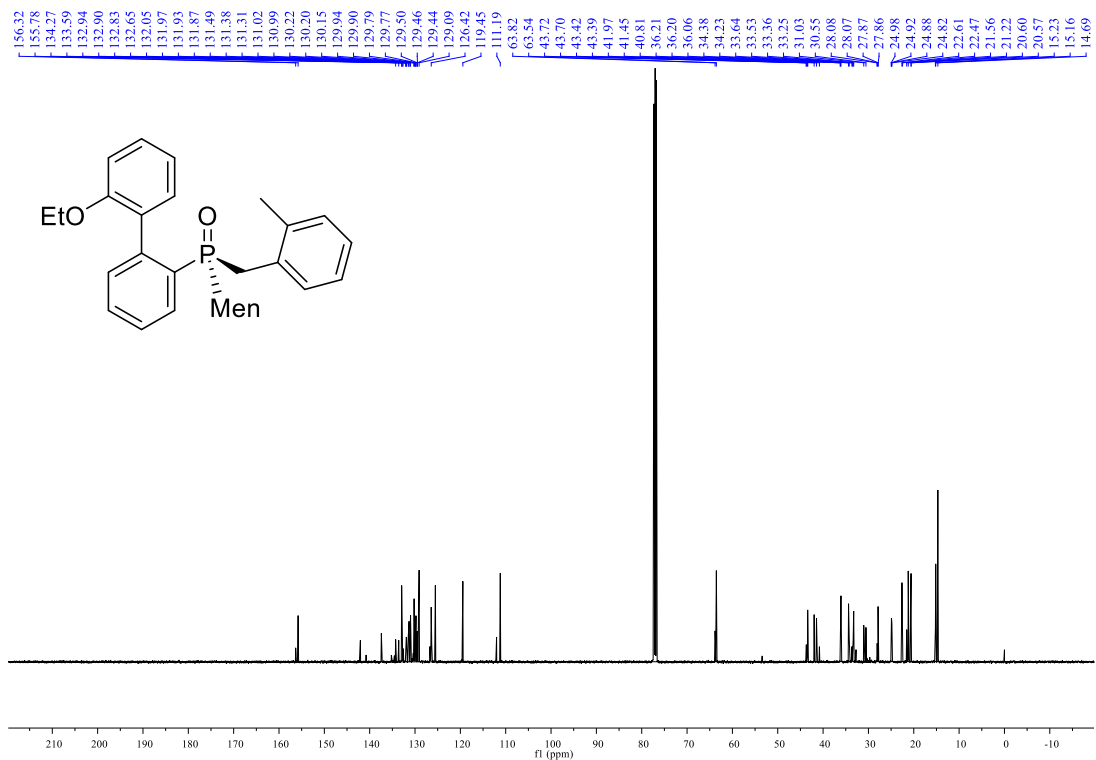

**$R_P$ -[2'-Ethoxy-[1,1'-biphenyl]-2-yl] ((-)-menthyl)(4-methylbenzyl) phosphine oxide ( $R_P$ -7h)**

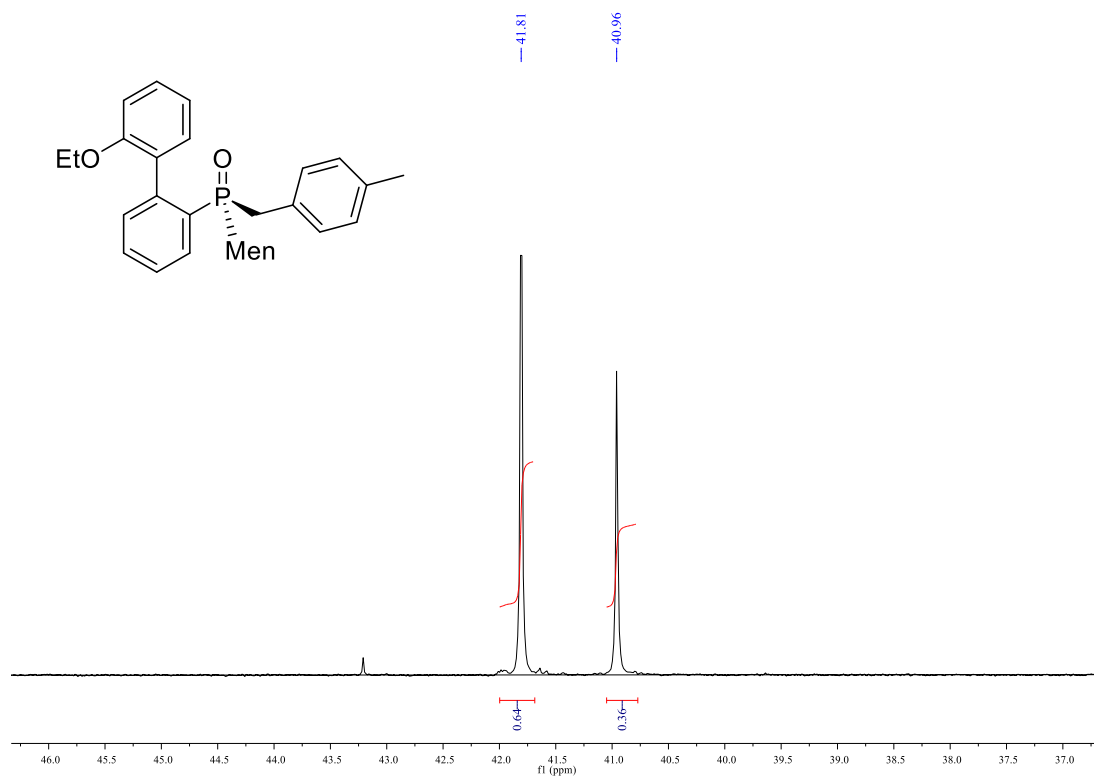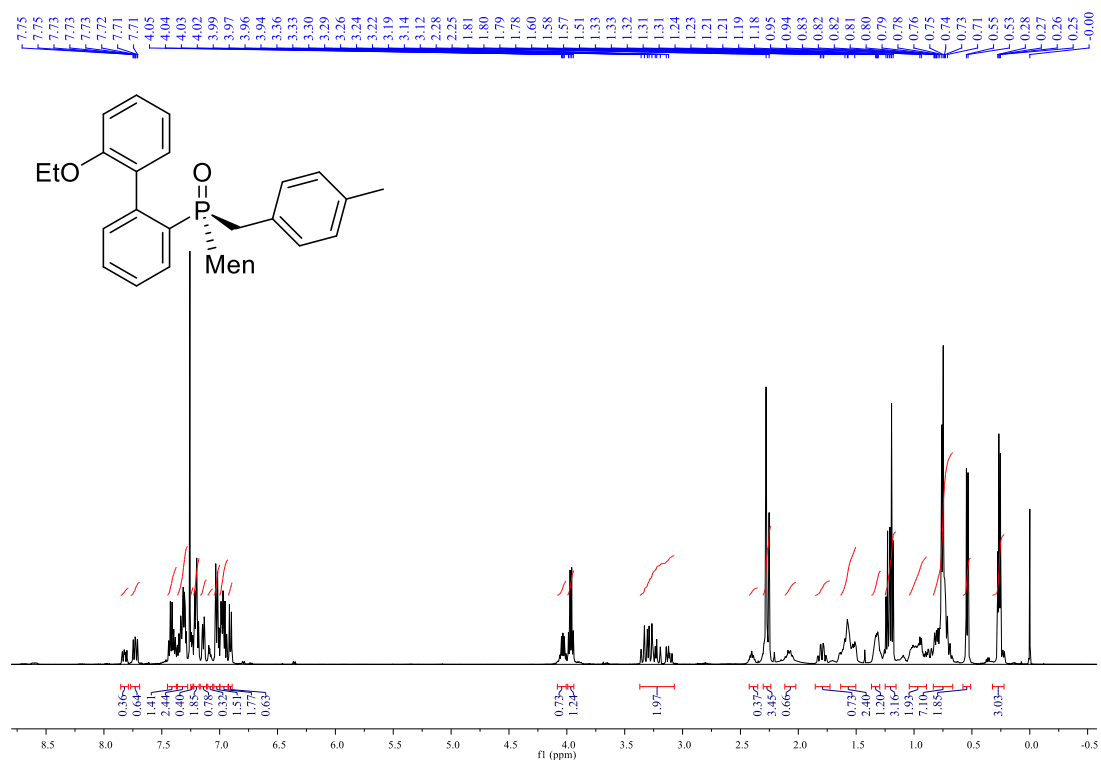

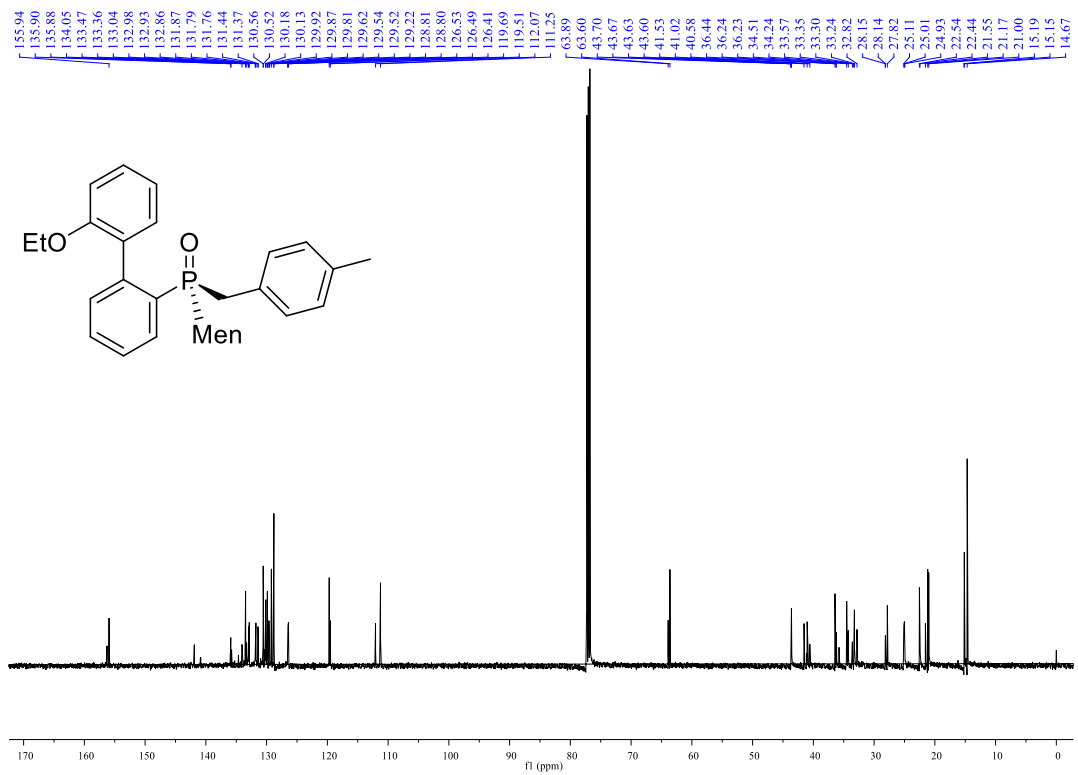

**$R_P$ -4-(tert-Butyl)benzyl(2'-ethoxy-[1,1'-biphenyl]-2-yl)((-)-menthyl) phosphine oxide ( $R_P$ -7i)**

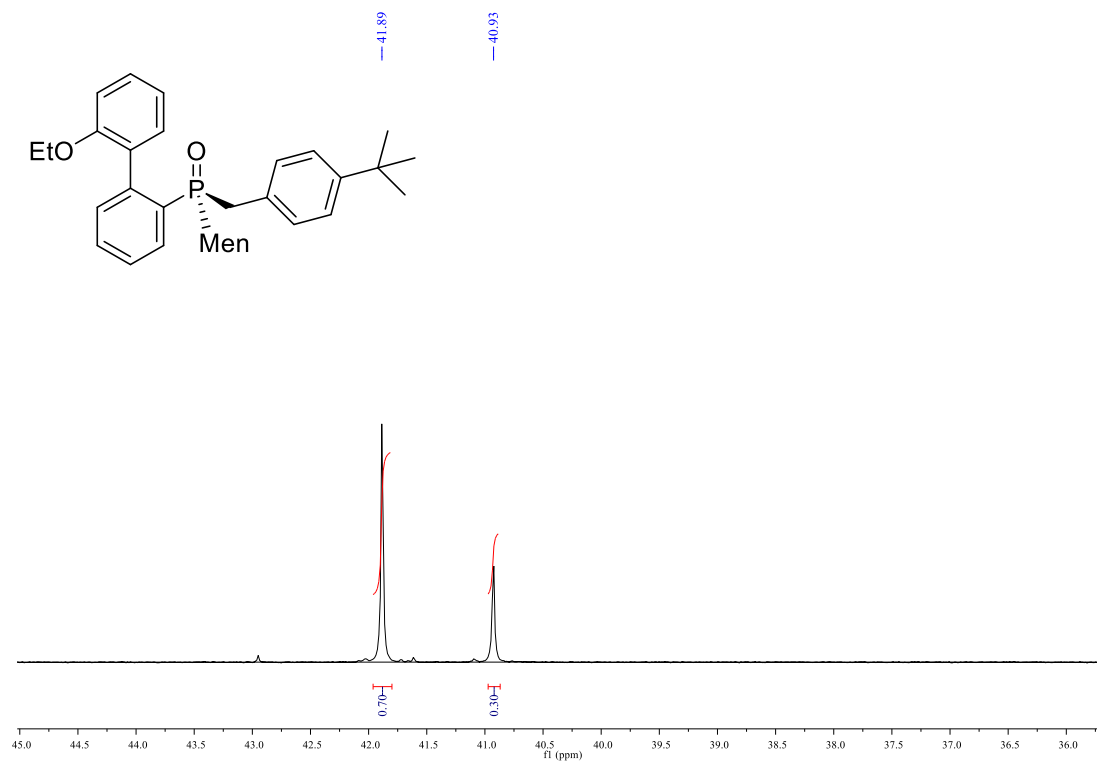

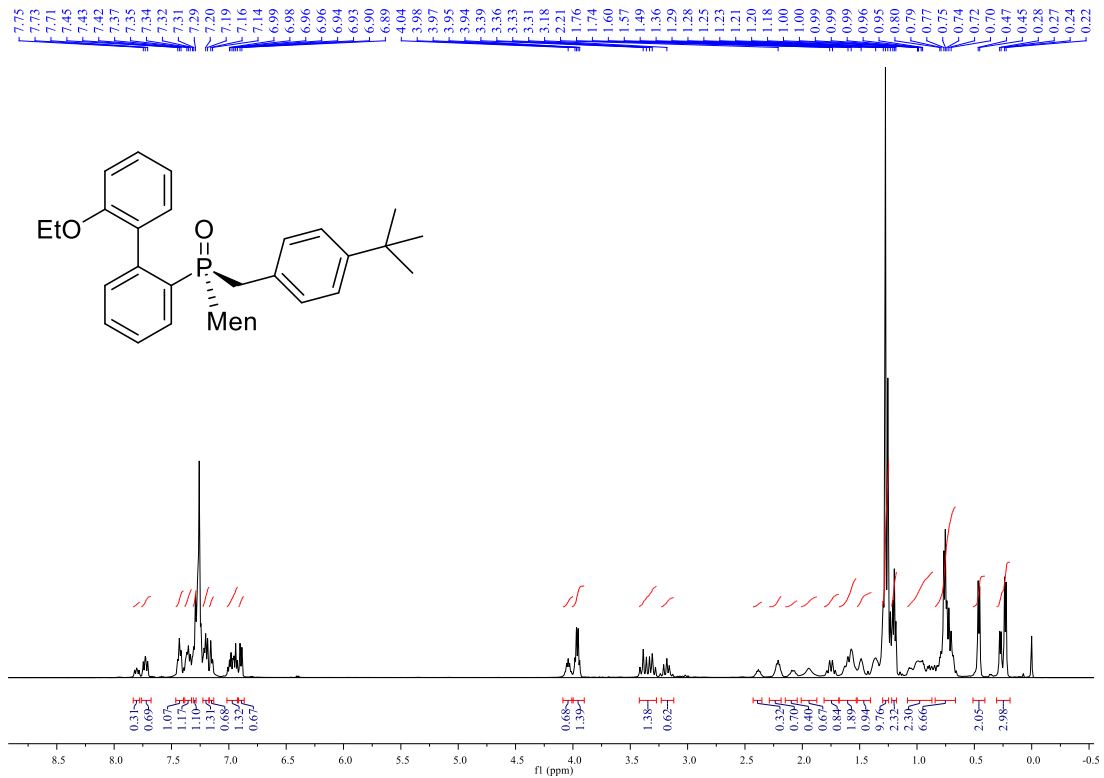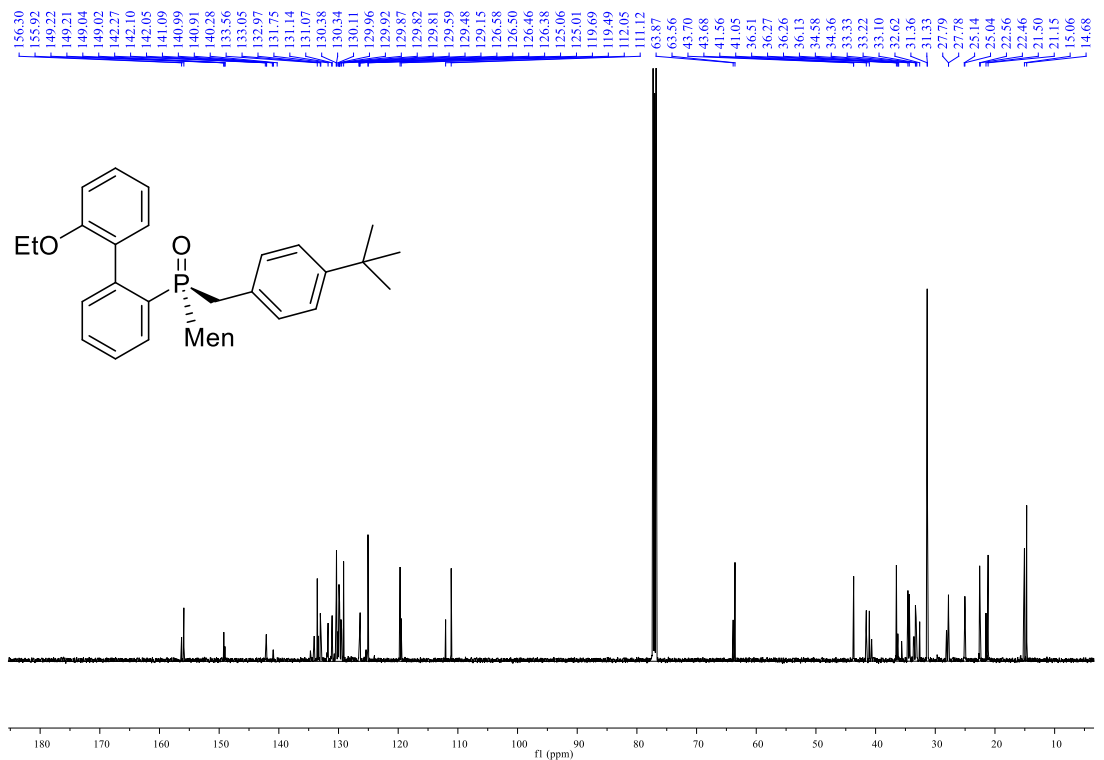

**$R_P$ -(2'-Ethoxy-[1,1'-biphenyl]-2-yl)((-)-menthyl)(3-methoxybenzyl) phosphine oxide ( $R_P$ -7j)**

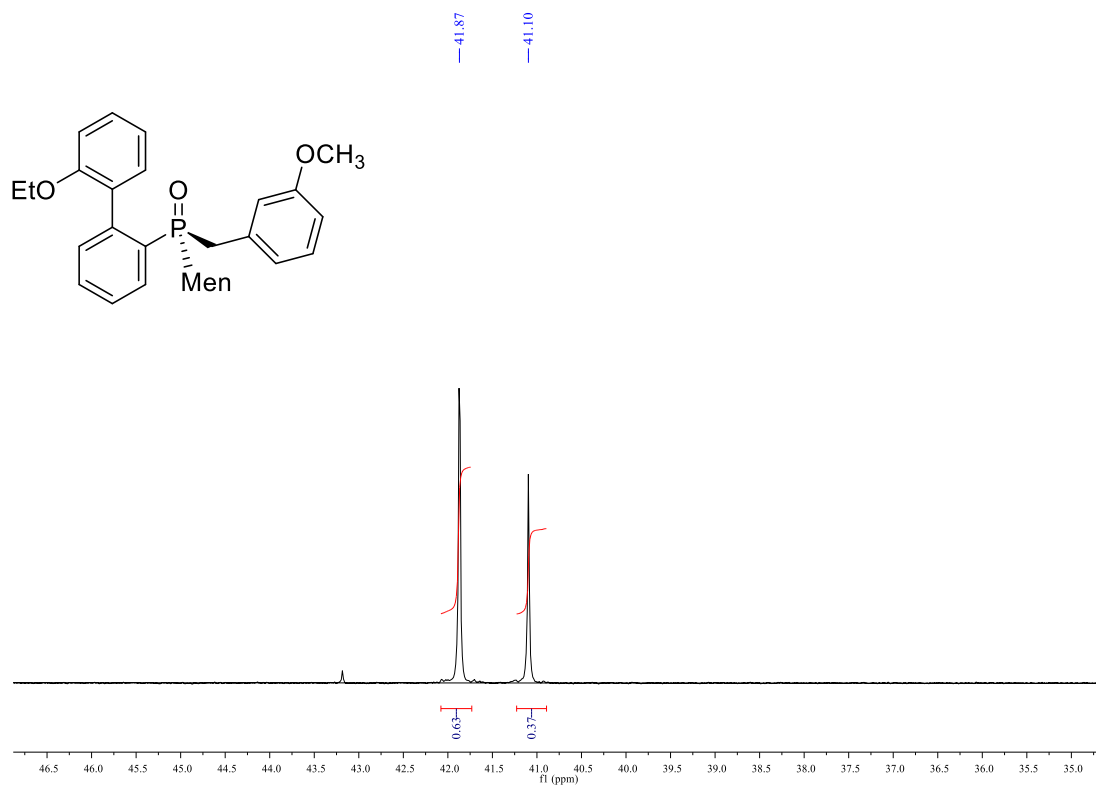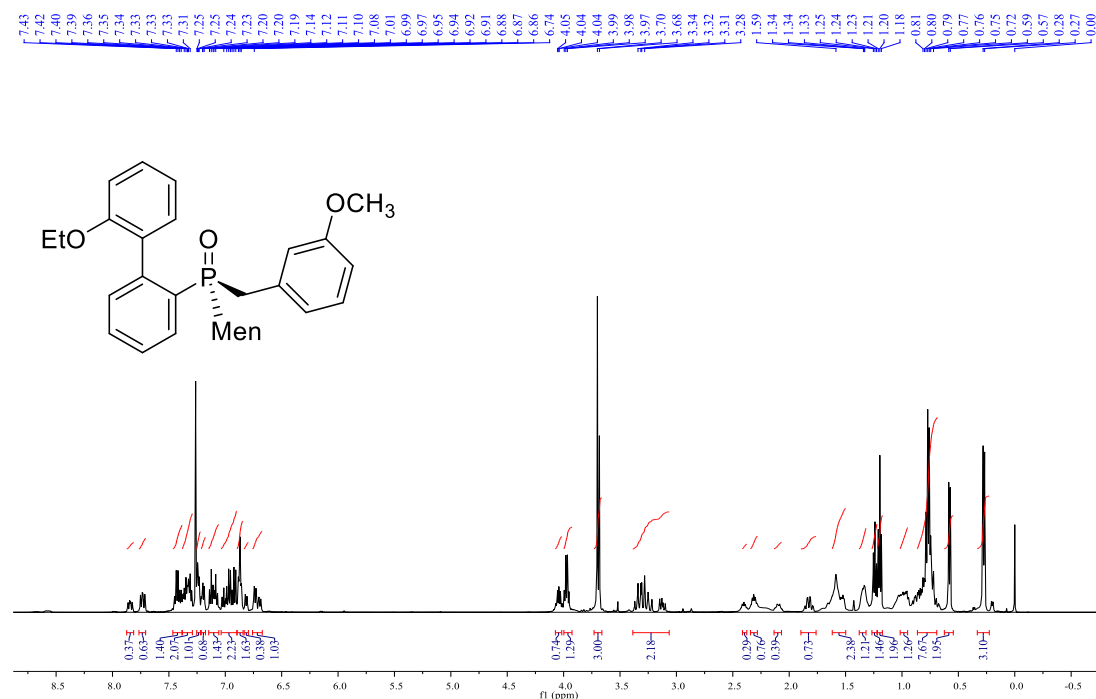

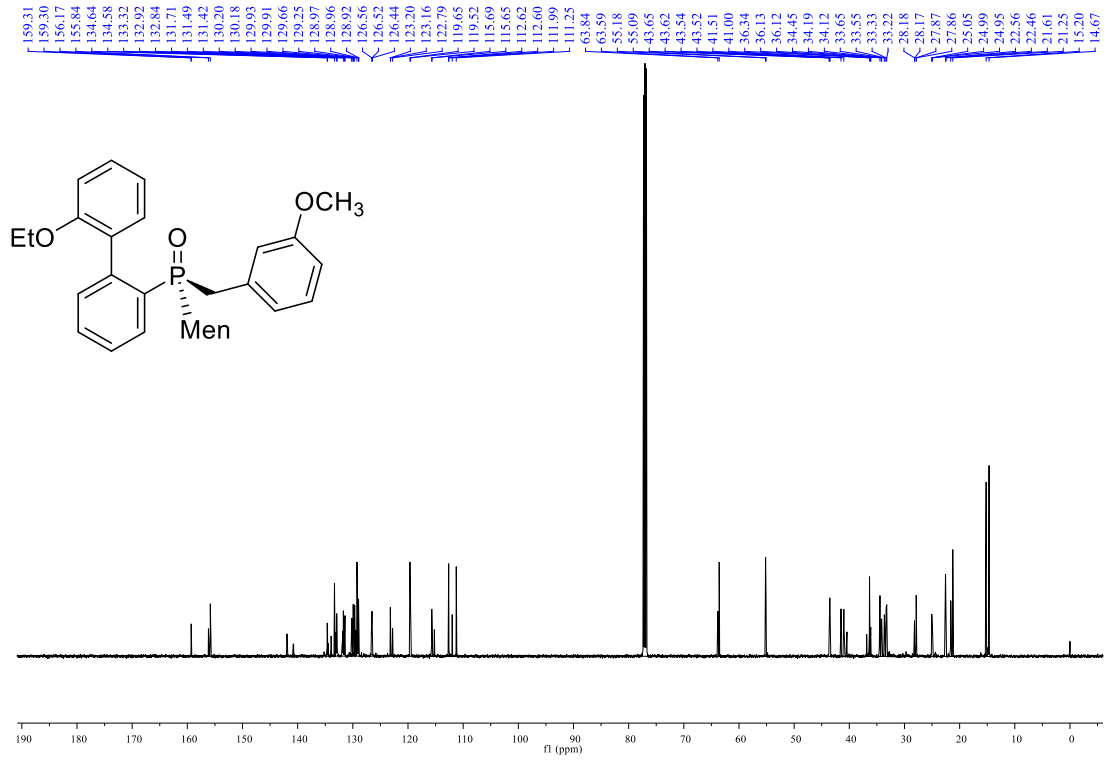

***R<sub>P</sub>*-2-(2-Chlorobenzyl)(2'-ethoxy-[1,1'-biphenyl]-2-yl)((-)-menthyl) phosphine oxide (*R<sub>P</sub>*-7k)**

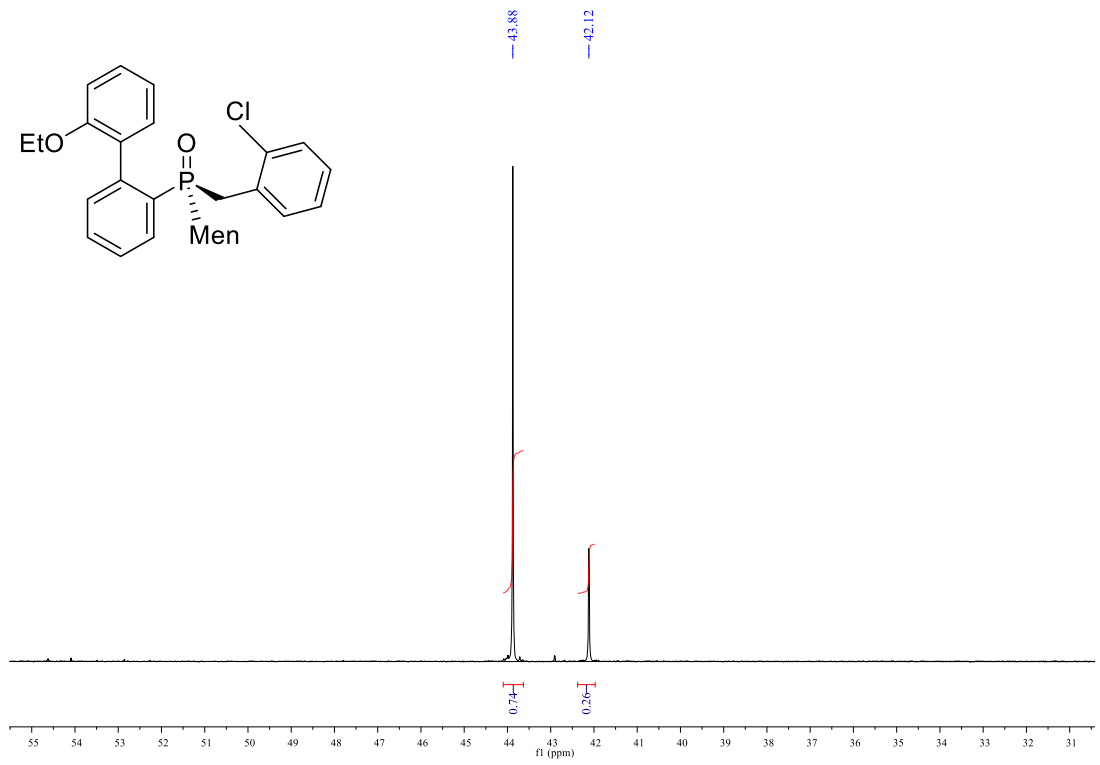

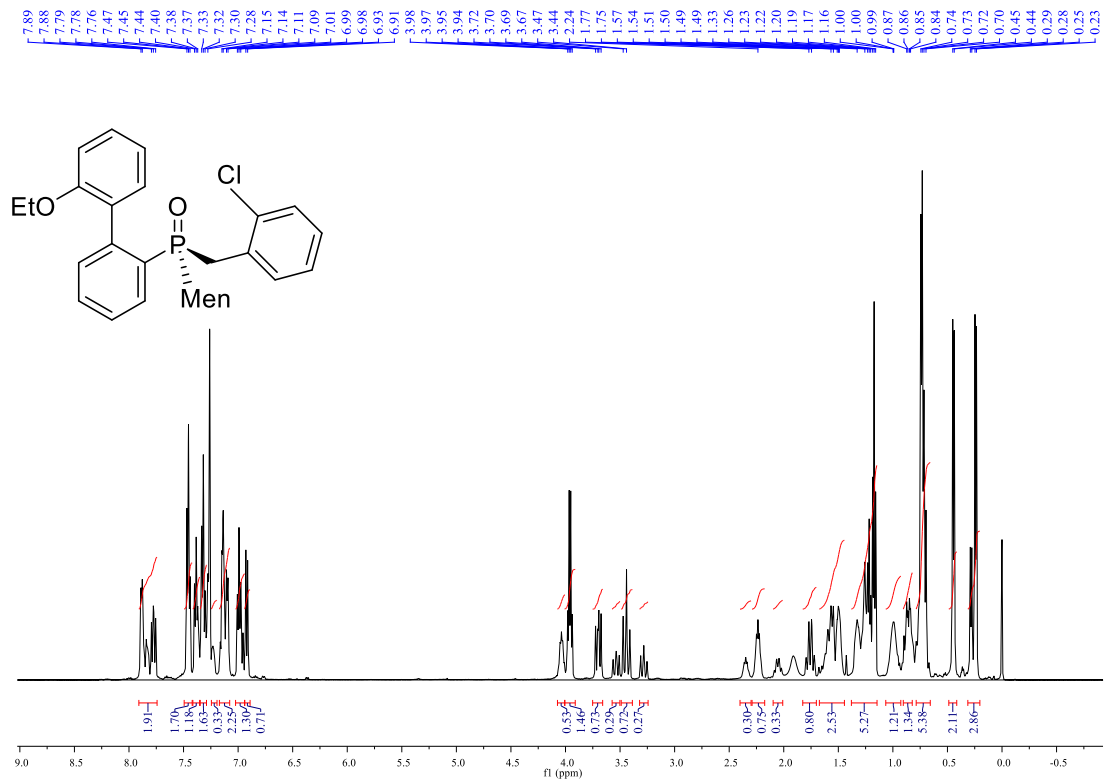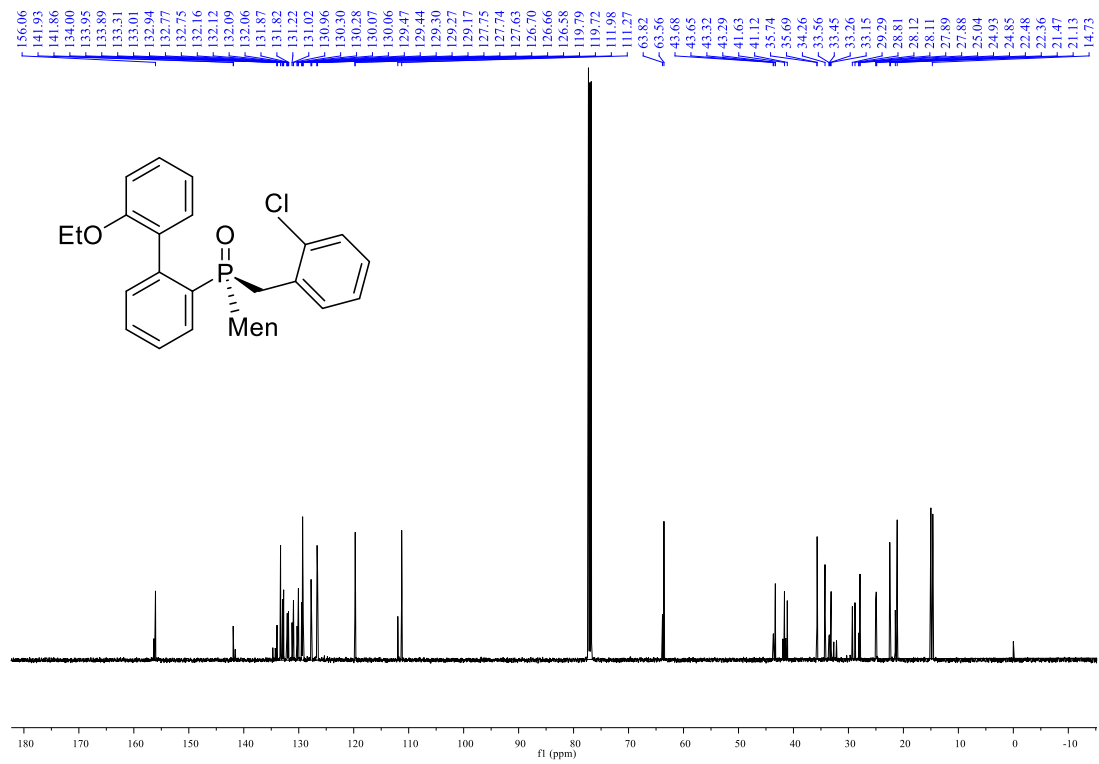

**$R_P$ -(4-Chlorobenzyl)(2'-ethoxy-[1,1'-biphenyl]-2-yl)((-)-menthyl) phosphine oxide ( $R_P$ -71)**

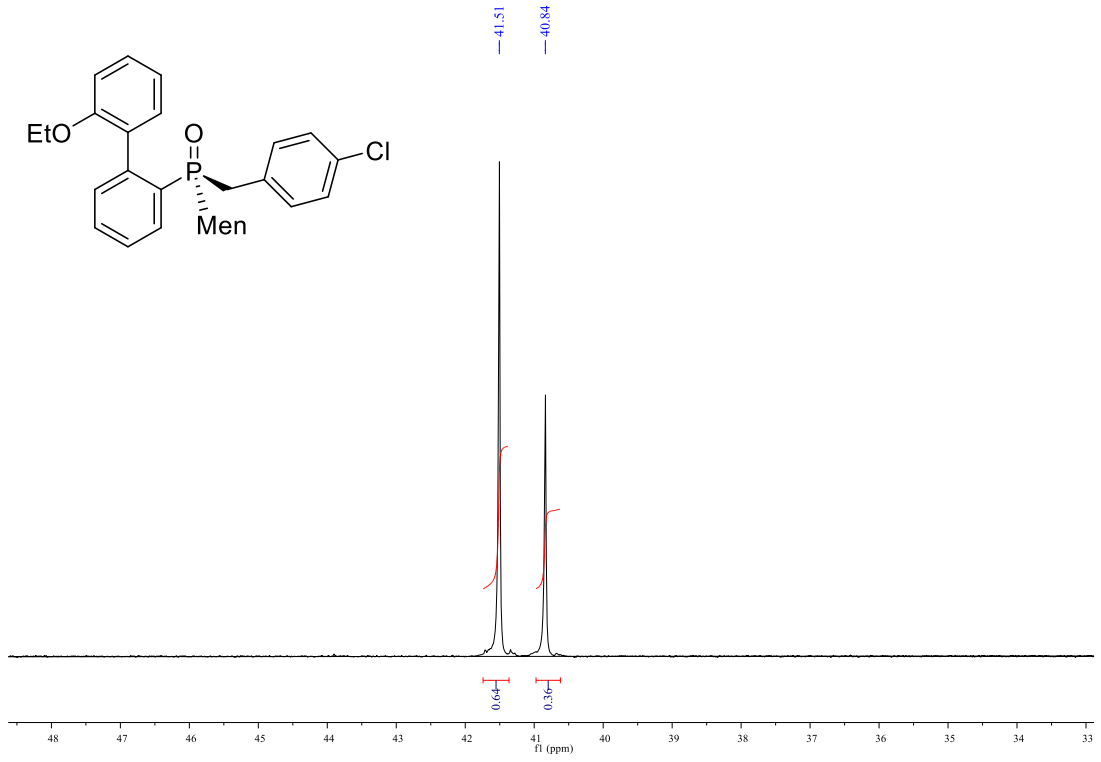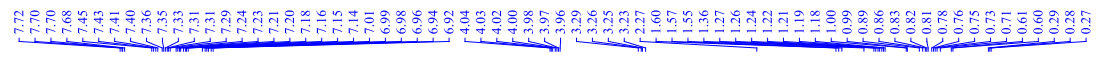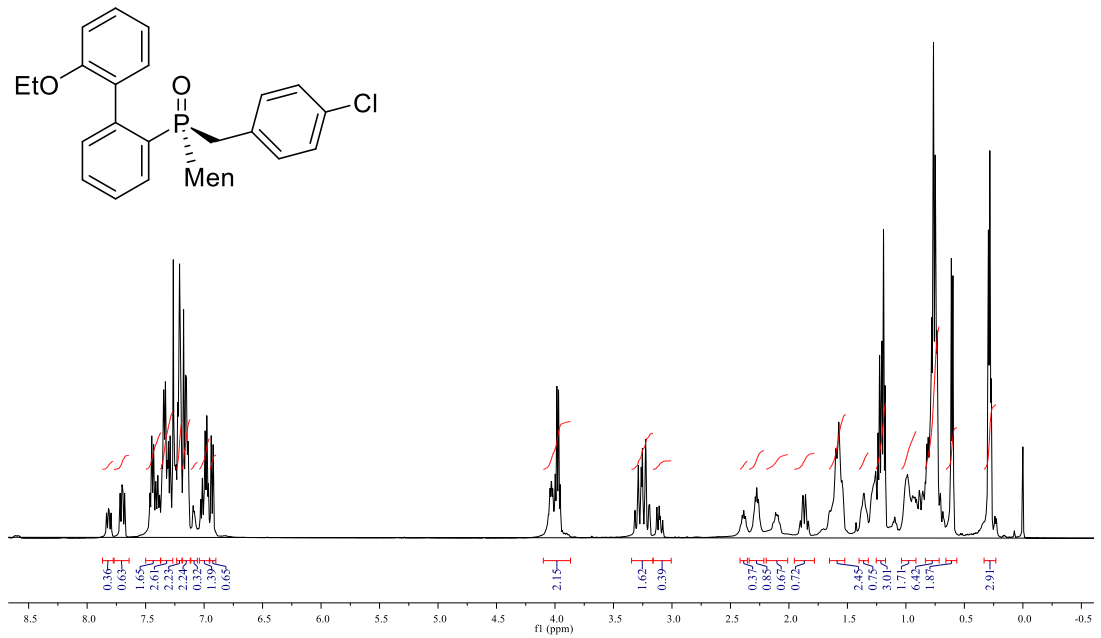



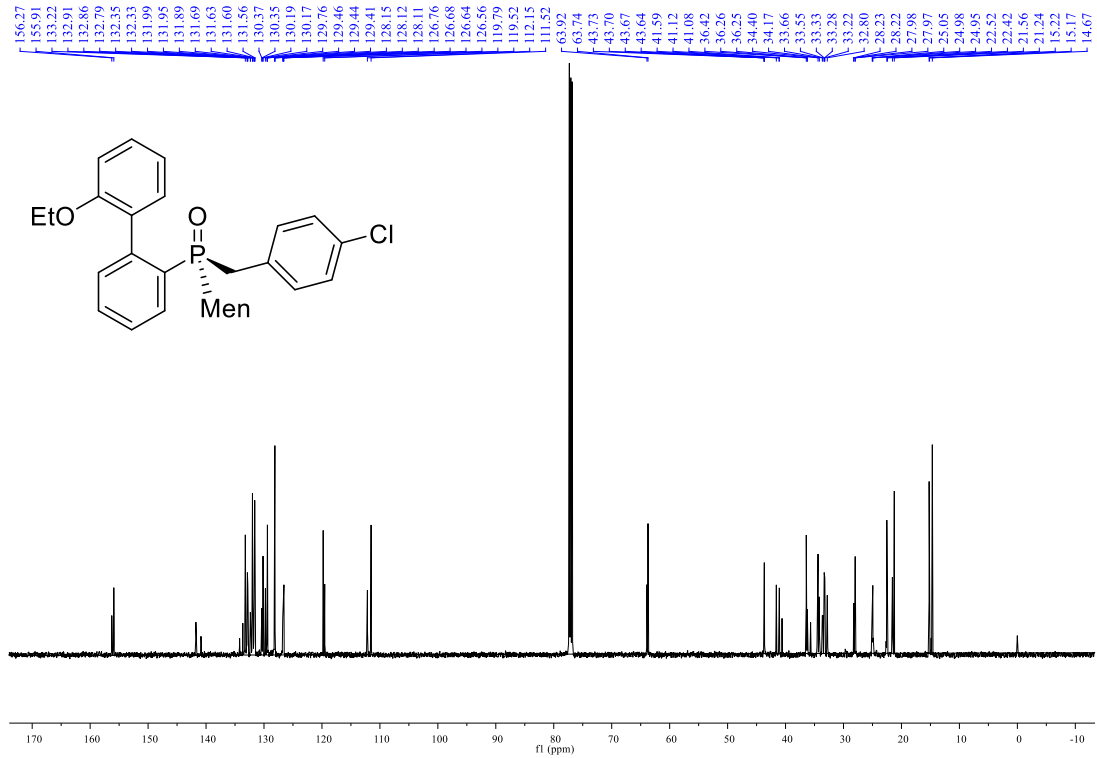

$(R_P)$ -(-)-Menthyl (2'-ethoxy-[1,1'-biphenyl]-2-yl) phosphine oxide ( $R_P$ -11)

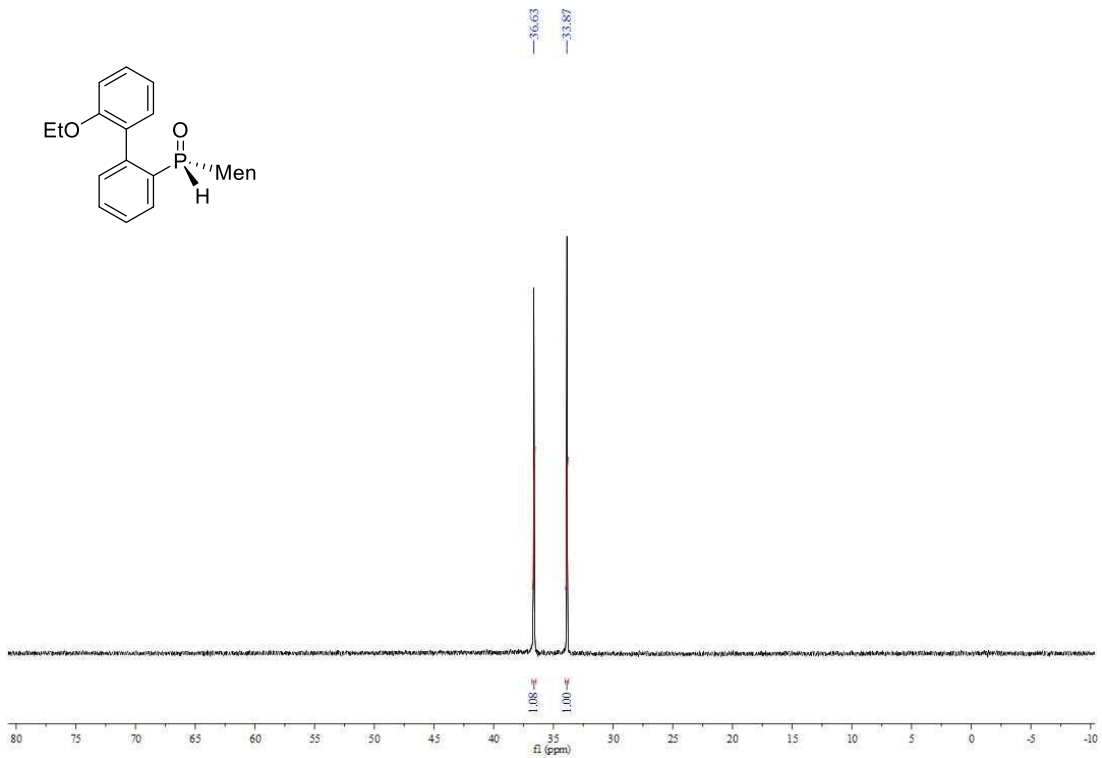

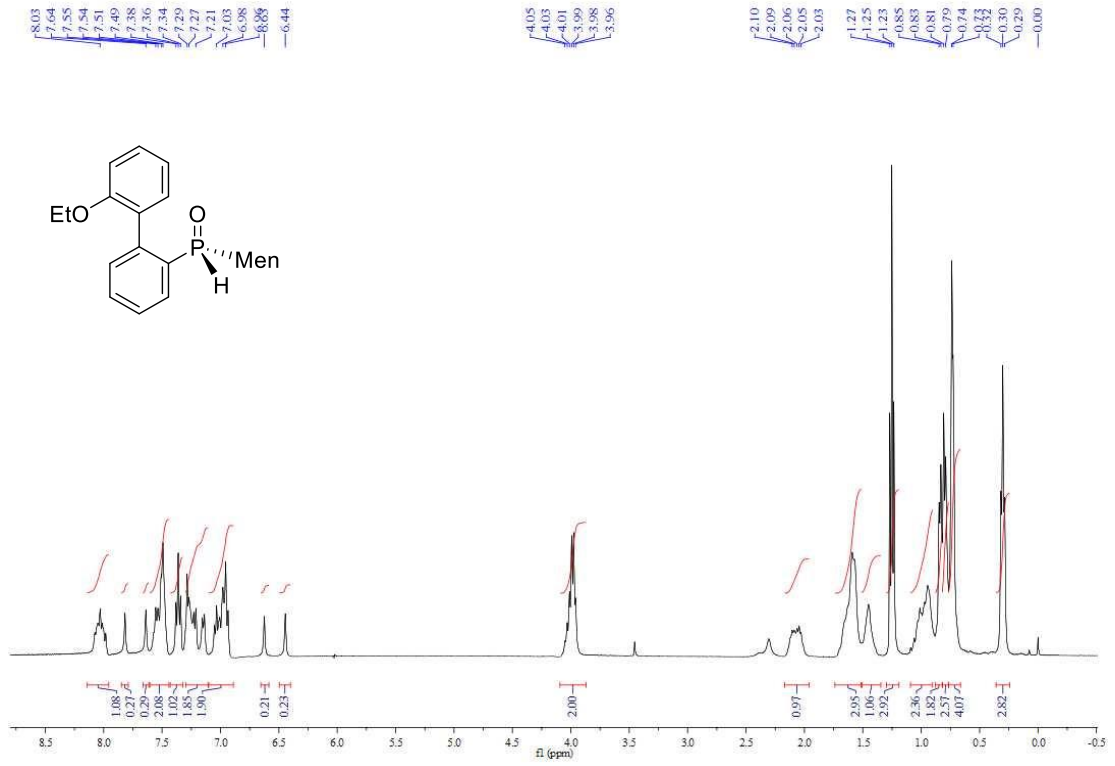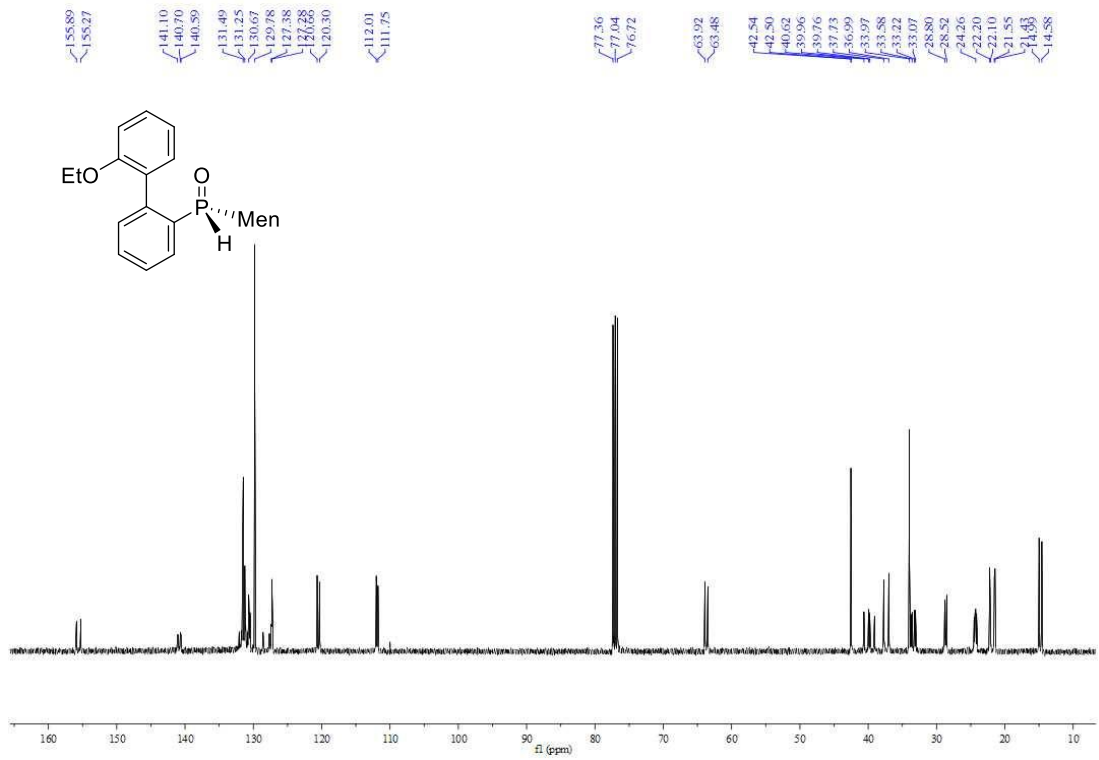

**$R_P$ -(2'-Ethoxy-[1,1'-biphenyl]-2-yl)(hydroxymethyl)((-)-menthyl) phosphine oxide ( $R_P$ -17)**

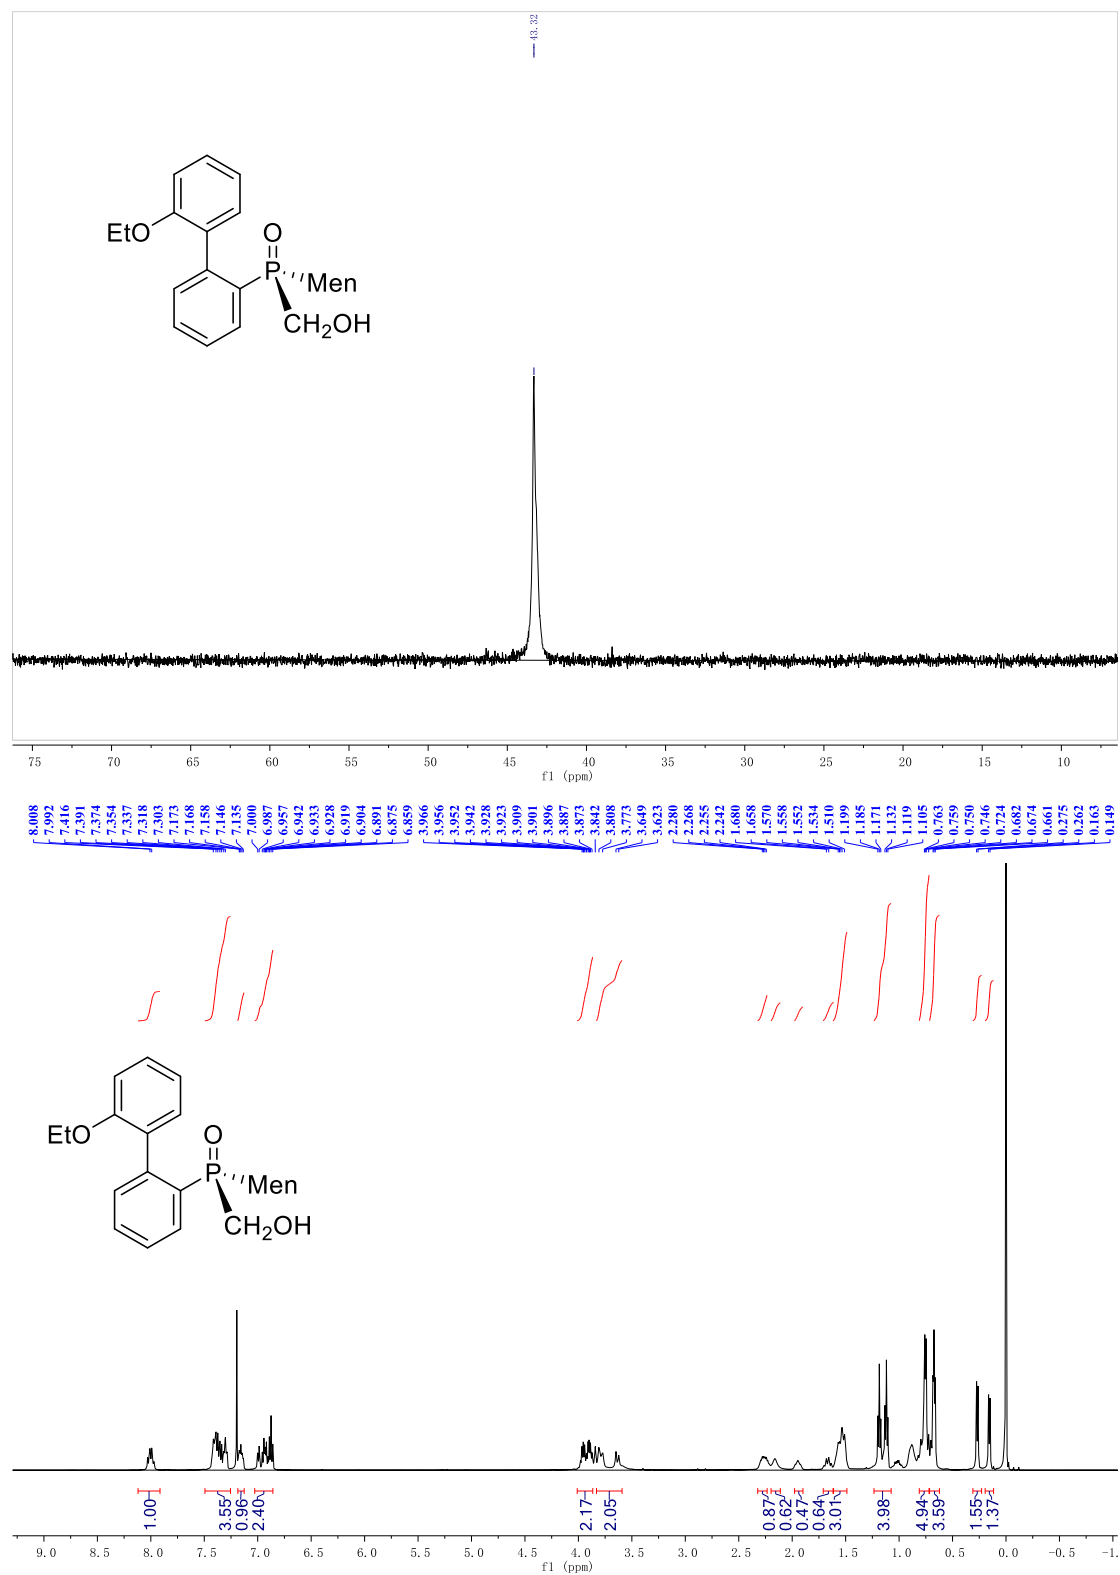

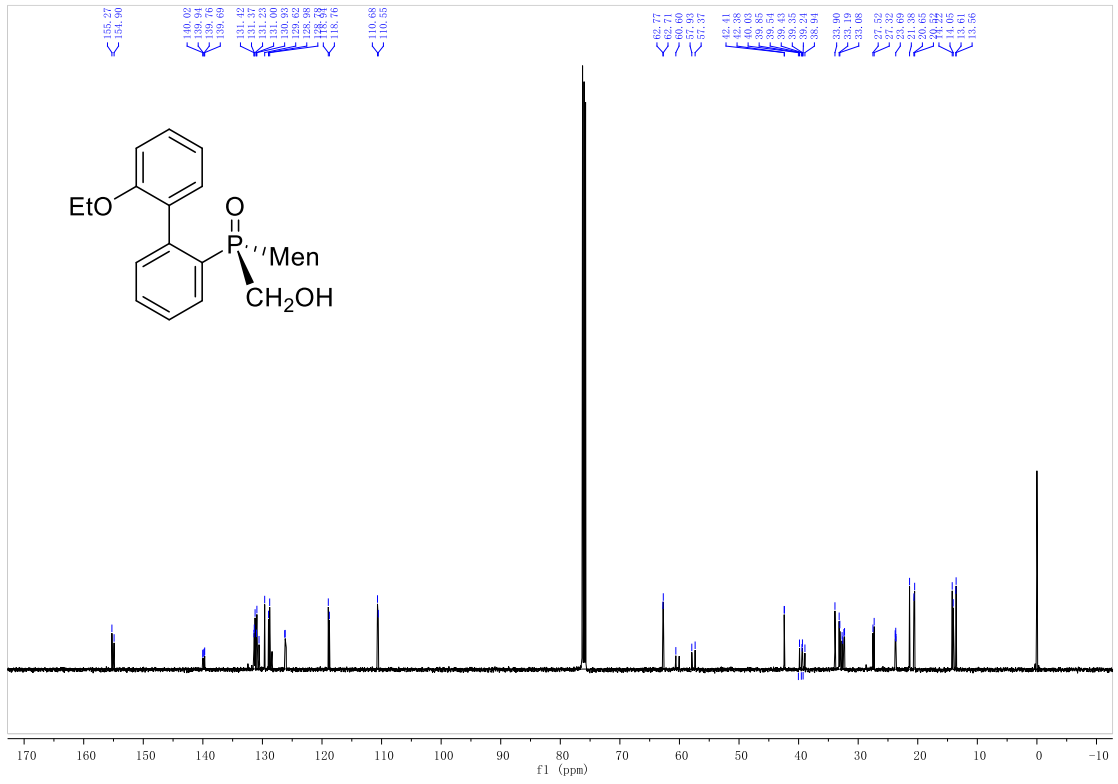

Supplement: d0qo00891e1.pdf [file d0qo00891e1.pdf]
